# Supplementary material for: MeiosisOnline: A Manually Curated Database for Tracking and Predicting Genes Associated With Meiosis
Source: Front Cell Dev Biol. 2021 Aug 13;9:673073. doi: 10.3389/fcell.2021.673073 (PMC8415030; doi:10.3389/fcell.2021.673073)
Supplement: Supplementary file 11 [file Table_6.XLSX]

## Sheet: Sheet1
Supplementary Table 6. GO analysis for known genes in meiosis
ONTOLOGY	ID	Description	GeneRatio	BgRatio	pvalue	p.adjust	qvalue	geneID	Count
Biological process	GO:0051321	meiotic cell cycle	133/494	309/23174	3.47279e-142	1.65548e-138	8.70026e-139	19355/22768/13164/54204/110147/50505/19357/22026/224826/17701/22589/13870/71711/18159/232174/230861/69260/18747/217716/18861/218914/17687/195434/54427/17350/211651/56371/12237/99412/15499/230103/223989/14748/12427/20437/54418/14087/17535/74237/56739/77053/12531/52864/26909/12566/11920/228421/224727/104362/17864/12317/64707/214901/76915/213389/75828/12316/74691/15270/381759/50796/60530/74369/75033…	133
Biological process	GO:1903046	meiotic cell cycle process	106/494	193/23174	3.03813e-127	7.24139e-124	3.80566e-124	19355/22768/13164/54204/110147/50505/224826/17701/22589/13870/71711/232174/230861/69260/217716/218914/17687/54427/17350/211651/56371/99412/15499/223989/14748/20437/54418/14087/17535/56739/77053/12531/52864/11920/228421/224727/17864/12317/64707/214901/76915/213389/75828/12316/74691/381759/50796/60530/74369/75033/69716/114714/22187/72415/235559/68298/19183/18817/30939/71846/70891/67141/114642/26972…	106
Biological process	GO:0140013	meiotic nuclear division	102/494	174/23174	1.81265e-126	2.8803e-123	1.51372e-123	19355/22768/13164/54204/110147/50505/224826/17701/71711/232174/230861/69260/217716/218914/17687/54427/17350/211651/56371/99412/15499/223989/14748/20437/54418/14087/17535/56739/77053/12531/52864/11920/228421/224727/17864/12317/64707/214901/76915/213389/75828/12316/74691/381759/50796/60530/74369/75033/69716/114714/22187/72415/235559/19183/18817/30939/71846/70891/67141/114642/26972/239083/74068/5599…	102
Biological process	GO:0000280	nuclear division	133/494	403/23174	1.38775e-123	1.65385e-120	8.69168e-121	19355/71175/22768/13164/218294/13614/21803/54204/110147/18591/21926/50505/12576/19357/224826/12540/17120/17701/22589/71711/13982/16211/232174/230861/69260/217716/218914/17687/54427/17350/211651/56371/12237/99412/15499/223989/14748/20437/54418/226026/14087/17535/56739/77053/12531/52864/11920/228421/224727/17864/12317/64707/214901/76915/213389/75828/16319/12316/73804/74691/381759/50796/60530/74369/…	133
Biological process	GO:0048285	organelle fission	134/494	450/23174	1.06977e-117	1.01992e-114	5.36012e-115	19355/71175/22768/13164/19017/218294/13614/21803/54204/110147/18591/21926/50505/12576/19357/224826/12540/17120/17701/22589/71711/13982/16211/232174/230861/69260/217716/218914/17687/54427/17350/211651/56371/12237/99412/15499/223989/14748/20437/54418/226026/14087/17535/56739/77053/12531/52864/11920/228421/224727/17864/12317/64707/214901/76915/213389/75828/16319/12316/73804/74691/381759/50796/60530/…	134
Biological process	GO:0022412	cellular process involved in reproduction in multicellular organism	113/494	431/23174	1.81054e-91	1.43848e-88	7.55981e-89	83557/22768/13164/76407/21803/235320/11651/54204/110147/20869/20779/12028/17311/224826/19401/66722/13870/27356/83964/19242/58230/15463/18159/232174/18472/69260/18747/217716/13363/54427/17350/15499/230103/13435/223989/20437/54418/14087/381022/16590/56739/12531/16336/11920/228421/17450/17864/64707/214901/18291/17685/12316/74691/381759/50796/22702/60530/19725/74369/75033/69716/114714/22187/26910/577…	113
Biological process	GO:0007127	meiosis I	70/494	107/23174	2.53338e-91	1.72523e-88	9.06684e-89	110147/50505/224826/71711/230861/69260/217716/17687/54427/17350/211651/20437/54418/17535/56739/77053/12531/52864/11920/224727/17864/214901/76915/213389/74691/381759/50796/74369/75033/69716/114714/22187/235559/19183/18817/30939/71846/67141/114642/26972/239083/55993/15512/68549/110958/13404/71241/75459/83456/83558/12190/19361/66197/12877/105988/20878/73679/74075/50878/67981/104271/20957/66654/98558…	70
Biological process	GO:0061982	meiosis I cell cycle process	71/494	112/23174	4.03776e-91	2.406e-88	1.26446e-88	110147/50505/224826/13870/71711/230861/69260/217716/17687/54427/17350/211651/20437/54418/17535/56739/77053/12531/52864/11920/224727/17864/214901/76915/213389/74691/381759/50796/74369/75033/69716/114714/22187/235559/19183/18817/30939/71846/67141/114642/26972/239083/55993/15512/68549/110958/13404/71241/75459/83456/83558/12190/19361/66197/12877/105988/20878/73679/74075/50878/67981/104271/20957/66654…	71
Biological process	GO:0007059	chromosome segregation	90/494	313/23174	2.85122e-76	1.5102e-73	7.93673e-74	71175/12189/54204/110147/50505/19357/17120/22589/71711/22196/16211/21976/57261/66140/217716/218914/17687/17350/211651/12237/13205/66468/13018/54418/226026/17535/219114/56739/77053/52864/11920/228421/224727/67241/214901/75828/16319/73804/74369/58186/75033/69716/114714/20877/72415/68298/230936/18817/30939/67052/71846/23834/67141/26972/239083/55993/70385/68549/110958/13404/13605/21335/75459/11799/83…	90
Biological process	GO:0098813	nuclear chromosome segregation	78/494	254/23174	1.98906e-68	9.48186e-66	4.98312e-66	71175/54204/110147/50505/19357/17120/22589/71711/16211/217716/218914/17687/17350/211651/12237/54418/226026/17535/56739/77053/52864/11920/228421/224727/75828/16319/73804/74369/75033/69716/114714/20877/72415/68298/230936/18817/30939/67052/71846/23834/67141/26972/239083/55993/70385/68549/110958/13404/13605/21335/75459/11799/83558/12190/268697/18005/107995/12877/105988/12236/73679/74075/50878/67981/7…	78
Biological process	GO:0045132	meiotic chromosome segregation	52/494	95/23174	7.63096e-62	3.30698e-59	1.73796e-59	54204/110147/50505/71711/217716/218914/17687/17350/211651/54418/17535/56739/77053/52864/11920/224727/75828/74369/75033/69716/114714/72415/18817/30939/71846/26972/239083/55993/68549/110958/13404/75459/83558/12190/12877/105988/12236/73679/74075/50878/67981/104271/20957/66654/98558/20962/76850/22210/668929/384619/17451/240697	52
Biological process	GO:0007292	female gamete generation	56/494	144/23174	8.60612e-56	3.41878e-53	1.79672e-53	13164/54204/20779/13870/71567/19242/18159/217716/17687/17350/15499/230103/223989/54418/381022/56739/12531/16336/11920/18291/12316/381759/50796/75033/69716/114714/22187/26910/18817/72504/66634/67141/26972/14566/55993/68549/110958/13404/12190/20899/268697/20878/50878/67981/320558/20962/11576/22417/18795/229357/19229/54611/384619/53422/240697/22697	56
Biological process	GO:0007281	germ cell development	76/494	335/23174	9.42574e-56	3.45634e-53	1.81646e-53	83557/22768/13164/76407/235320/11651/110147/20869/20779/12028/17311/19401/66722/13870/27356/83964/19242/58230/15463/18159/18472/69260/18747/13363/17350/230103/223989/54418/381022/16590/56739/12531/16336/11920/18291/17685/12316/381759/50796/22702/19725/74369/75033/69716/26910/57749/72504/67141/26972/14566/239083/74068/15512/13404/71241/75514/12190/20899/268697/20878/67981/20957/20962/22417/18795/2…	76
Biological process	GO:0007140	male meiotic nuclear division	38/494	50/23174	7.13867e-54	2.43072e-51	1.27745e-51	224826/232174/69260/217716/54427/17350/20437/14087/56739/11920/228421/17864/64707/214901/74691/60530/74369/69716/114714/22187/70891/114642/26972/74068/15512/68549/110958/13404/71241/83456/83558/12190/73679/50878/104271/320558/98558/76850	38
Biological process	GO:0045143	homologous chromosome segregation	40/494	60/23174	8.19093e-53	2.60308e-50	1.36803e-50	110147/217716/17687/17350/211651/54418/17535/56739/77053/11920/224727/74369/75033/69716/18817/30939/71846/26972/239083/55993/13404/75459/83558/12190/12877/105988/73679/74075/50878/67981/104271/20957/66654/98558/20962/76850/22210/668929/384619/240697	40
Biological process	GO:0070192	chromosome organization involved in meiotic cell cycle	42/494	70/23174	1.80185e-52	5.36839e-50	2.82132e-50	110147/22589/217716/17687/17350/211651/17535/56739/77053/11920/224727/75828/74369/75033/69716/114714/68298/71846/26972/239083/55993/68549/13404/75459/83558/19361/12877/12236/73679/74075/50878/67981/104271/20957/66654/98558/20962/76850/22210/668929/384619/240697	42
Biological process	GO:0006310	DNA recombination	67/494	278/23174	5.7412e-51	1.6099e-48	8.46072e-49	71175/12189/19366/21803/50505/225160/22632/21750/224826/70238/13870/71567/54125/71711/18970/58230/18861/17687/17350/56626/14375/226026/17535/56739/52864/26909/11920/22594/67241/214901/76915/213389/17685/15270/12545/71890/60530/58186/75033/69716/114714/235559/19183/19362/12144/12649/171506/66634/26972/239083/55993/13404/75459/83558/12190/19361/73679/104271/20957/20962/12053/22210/19364/668929/3846…	67
Biological process	GO:0006281	DNA repair	80/494	464/23174	5.47754e-49	1.45064e-46	7.62371e-47	19355/71175/12189/19366/218294/67030/11350/50505/22632/22059/211064/19357/59026/70238/19359/13649/22589/13870/71567/54125/71711/18970/58230/99375/217716/18861/71702/17687/17350/211651/56371/15499/56626/223989/14375/54418/226026/14087/17535/56739/52864/26909/12566/11920/68026/22594/20937/67241/17685/21849/15270/12545/71890/60530/58186/69716/114714/15361/235559/19362/30939/18140/12144/12649/66634/2…	80
Biological process	GO:0048608	reproductive structure development	75/494	449/23174	7.17596e-45	1.80041e-42	9.46192e-43	71175/16867/14180/11651/26362/26416/18591/26413/12576/20869/20779/211064/12028/17311/20683/19401/56218/13649/22589/13870/27356/13039/100986/11835/65247/19242/17289/13982/69260/22174/75605/13363/54427/15904/15499/11614/14087/26395/16590/56739/16336/11920/228421/18291/12155/17685/21849/12316/50796/70248/22187/56449/26972/14566/55993/13404/83558/12190/73679/104271/320558/11576/22417/12050/229357/192…	75
Biological process	GO:0061458	reproductive system development	75/494	453/23174	1.37912e-44	3.28713e-42	1.72753e-42	71175/16867/14180/11651/26362/26416/18591/26413/12576/20869/20779/211064/12028/17311/20683/19401/56218/13649/22589/13870/27356/13039/100986/11835/65247/19242/17289/13982/69260/22174/75605/13363/54427/15904/15499/11614/14087/26395/16590/56739/16336/11920/228421/18291/12155/17685/21849/12316/50796/70248/22187/56449/26972/14566/55993/13404/83558/12190/73679/104271/320558/11576/22417/12050/229357/192…	75
Biological process	GO:0007129	synapsis	33/494	49/23174	5.91895e-44	1.3436e-41	7.0612e-42	110147/217716/17687/17350/211651/17535/56739/77053/224727/75033/69716/71846/26972/239083/55993/13404/75459/83558/12877/73679/74075/50878/67981/104271/20957/66654/98558/20962/76850/22210/668929/384619/240697	33
Biological process	GO:0051052	regulation of DNA metabolic process	73/494	439/23174	1.59472e-43	3.45548e-41	1.816e-41	12189/19017/108058/21803/11651/110147/18591/50505/16476/225160/26413/22059/20779/12028/56637/21750/70238/12540/13649/22589/52463/13870/58230/18159/99375/18861/218914/54427/17350/606496/15499/13435/12578/81702/54418/17535/52864/12566/11920/17450/22594/20937/214901/213389/17685/21849/12545/71890/60530/58186/20877/19362/12144/12534/12649/171506/15519/67141/12428/12190/19361/18005/71988/104271/12053/…	73
Biological process	GO:0051783	regulation of nuclear division	53/494	194/23174	1.76076e-43	3.64937e-41	1.9179e-41	19355/71175/22768/13164/218294/13614/21803/18591/21926/12576/19357/12540/17120/17701/22589/13982/230861/56371/12237/14748/226026/11920/12317/213389/381759/50796/69716/20877/18817/30939/67052/12649/23834/67141/70385/68549/21335/11799/268697/18005/107995/12236/67981/22417/18795/229776/17702/54611/20843/22210/378430/328440/17451	53
Biological process	GO:0048477	oogenesis	40/494	94/23174	5.84208e-42	1.16038e-39	6.09832e-40	13164/20779/13870/19242/18159/17350/230103/223989/54418/381022/56739/12531/16336/11920/18291/12316/381759/50796/75033/69716/26910/72504/67141/26972/14566/13404/12190/20899/268697/20878/67981/22417/18795/229357/19229/54611/384619/53422/240697/22697	40
Biological process	GO:0045787	positive regulation of cell cycle	64/494	347/23174	5.27894e-41	1.00659e-38	5.29005e-39	71175/12189/13164/108058/218294/22062/13614/21803/11651/12567/18591/21926/11350/225160/12576/22059/20779/19357/19401/17701/13649/22589/99375/18472/230861/57261/18747/15499/13205/12578/81702/226026/12531/12317/213389/20466/76123/12545/50796/114714/20877/67052/12534/12649/70891/23834/67141/15512/68549/13605/11799/12190/268697/22417/67117/18795/229776/17702/16848/22061/22210/14632/328440/671232	64
Biological process	GO:0007346	regulation of mitotic cell cycle	73/494	492/23174	5.07307e-40	9.30129e-38	4.88823e-38	71175/12189/108058/218294/22062/13614/21803/11651/12567/18591/21926/11350/12576/22059/19357/12540/17120/216166/13649/22589/71711/13982/99375/18472/57261/12237/15499/13205/12578/81702/226026/244329/17535/12531/12566/11920/17685/20466/16319/76123/12545/381759/50796/69716/114714/20877/117229/235559/18817/30939/12144/67052/12534/72119/12649/23834/67141/70385/15512/21335/11799/12190/268697/18005/66197…	73
Biological process	GO:0007548	sex differentiation	56/494	288/23174	3.27409e-37	5.78059e-35	3.03795e-35	71175/16867/14180/26362/20779/12028/17311/19401/56218/22589/13870/27356/100986/11835/65247/17289/13982/69260/22174/13363/11614/12416/14087/16590/56739/16336/11920/228421/18291/12155/17685/12316/50796/22187/56449/26972/14566/55993/13404/71241/83558/12190/73679/104271/320558/11576/22417/12050/229357/14308/16848/22061/76850/16875/54562/668929	56
Biological process	GO:0051445	regulation of meiotic cell cycle	31/494	57/23174	4.44416e-37	7.56619e-35	3.97636e-35	19355/22768/13164/17701/18159/230861/18747/56371/230103/14748/12531/12317/213389/12316/381759/50796/69716/67141/68549/107995/67981/22417/18795/17702/16848/54611/22210/378430/328440/671232/17451	31
Biological process	GO:0045786	negative regulation of cell cycle	66/494	449/23174	6.36994e-36	1.04709e-33	5.50289e-34	19355/12189/22768/218294/22062/21803/12567/26416/21926/11350/225160/12576/22059/20869/12568/19357/17120/13649/22589/71711/13982/18159/434204/99375/18747/18004/71702/218914/56371/12237/230103/12578/12580/244329/26395/17535/11920/12317/17685/381759/50796/69716/20877/117229/235559/18817/30939/12144/67052/12534/12649/23834/67141/70385/11799/83456/268697/18005/12236/67981/19211/229776/20843/378430/520…	66
Biological process	GO:0090068	positive regulation of cell cycle process	51/494	248/23174	3.33957e-35	5.30658e-33	2.78884e-33	71175/12189/13164/108058/218294/22062/13614/21803/11651/12567/18591/21926/22059/19357/17701/13649/22589/99375/230861/57261/18747/13205/12578/81702/226026/12531/213389/20466/76123/12545/50796/114714/20877/67052/12534/23834/67141/15512/68549/13605/11799/268697/22417/18795/229776/17702/22061/22210/14632/328440/671232	51
Biological process	GO:2000241	regulation of reproductive process	44/494	171/23174	5.66488e-35	8.71112e-33	4.57807e-33	19355/22768/13164/12576/20869/20779/17701/11835/13982/18159/230861/14595/18747/56371/230103/14748/12531/16336/12317/213389/12316/381759/50796/69716/67141/14566/68549/107995/20878/67981/22417/12801/18795/229357/17702/16848/54611/18119/20181/22210/378430/328440/671232/17451	44
Biological process	GO:0006302	double-strand break repair	48/494	220/23174	1.91195e-34	2.84821e-32	1.49685e-32	71175/12189/19366/50505/22632/22059/19357/70238/13870/71567/54125/71711/18970/58230/17350/15499/56626/223989/14375/54418/226026/17535/56739/52864/11920/22594/67241/17685/15270/12545/71890/60530/69716/114714/19362/12144/12649/66634/26972/13404/12190/19361/71988/104271/19364/668929/384619/240697	48
Biological process	GO:0070193	synaptonemal complex organization	22/494	25/23174	2.32422e-34	3.35745e-32	1.76448e-32	110147/217716/56739/224727/69716/18817/71846/26972/15512/75459/83558/12877/74075/67981/104271/20957/66654/20962/76850/22210/668929/240697	22
Biological process	GO:0044770	cell cycle phase transition	60/494	393/23174	1.26415e-33	1.77242e-31	9.31482e-32	12189/108058/218294/21803/11651/12567/17863/12576/22059/19357/17120/216166/22195/13649/99375/57261/56371/15904/12237/13205/12578/81702/12427/12580/17535/12531/12566/11920/20466/12545/69716/114714/20877/235559/18817/12144/67052/12534/12649/70891/23834/67141/12428/70385/15512/21335/11799/268697/66197/12236/18647/18795/19211/229776/22061/14632/328440/52004/671232/17451	60
Biological process	GO:0045137	development of primary sexual characteristics	47/494	218/23174	1.71807e-33	2.34002e-31	1.22978e-31	16867/14180/20779/12028/17311/19401/56218/22589/13870/27356/100986/11835/13982/69260/13363/11614/12416/14087/16590/56739/16336/11920/228421/18291/12155/17685/12316/50796/22187/56449/26972/14566/55993/13404/83558/12190/73679/11576/22417/12050/229357/14308/16848/76850/16875/54562/668929	47
Biological process	GO:0000819	sister chromatid segregation	43/494	178/23174	6.1374e-33	8.12693e-31	4.27105e-31	71175/19357/17120/22589/16211/218914/12237/226026/17535/56739/11920/228421/75828/16319/73804/69716/114714/20877/72415/68298/230936/18817/30939/67052/23834/67141/70385/68549/21335/11799/268697/18005/107995/105988/12236/50878/67981/71988/140557/20962/20843/668929/17451	43
Biological process	GO:0008406	gonad development	46/494	214/23174	9.82095e-33	1.26531e-30	6.64975e-31	16867/14180/20779/12028/17311/19401/56218/22589/13870/27356/100986/11835/13982/69260/13363/11614/14087/16590/56739/16336/11920/228421/18291/12155/17685/12316/50796/22187/56449/26972/14566/55993/13404/83558/12190/73679/11576/22417/12050/229357/14308/16848/76850/16875/54562/668929	46
Biological process	GO:0040020	regulation of meiotic nuclear division	24/494	37/23174	1.2264e-31	1.53849e-29	8.08541e-30	19355/22768/13164/17701/230861/56371/14748/12317/213389/381759/50796/69716/67141/68549/107995/67981/22417/18795/17702/54611/22210/378430/328440/17451	24
Biological process	GO:0007131	reciprocal meiotic recombination	25/494	44/23174	8.75119e-31	1.06966e-28	5.62155e-29	50505/224826/71711/17687/17350/52864/214901/76915/213389/69716/114714/235559/19183/26972/239083/55993/13404/75459/83558/19361/73679/20957/20962/22210/240697	25
Biological process	GO:1901987	regulation of cell cycle phase transition	50/494	289/23174	9.32165e-31	1.11091e-28	5.8383e-29	12189/108058/218294/21803/11651/12567/12576/22059/19357/17120/216166/13649/99375/57261/56371/12237/13205/12578/81702/17535/12531/12566/11920/20466/12545/69716/114714/20877/235559/18817/12144/67052/12534/12649/23834/67141/70385/15512/11799/268697/12236/18795/19211/229776/22061/14632/328440/52004/671232/17451	50
Biological process	GO:0035825	homologous recombination	25/494	45/23174	1.93065e-30	2.24473e-28	1.1797e-28	50505/224826/71711/17687/17350/52864/214901/76915/213389/69716/114714/235559/19183/26972/239083/55993/13404/75459/83558/19361/73679/20957/20962/22210/240697	25
Biological process	GO:0044772	mitotic cell cycle phase transition	54/494	355/23174	3.13331e-30	3.5563e-28	1.86899e-28	12189/108058/218294/21803/11651/12567/17863/12576/22059/19357/17120/216166/13649/99375/57261/15904/12237/13205/12578/81702/12427/12580/17535/12531/12566/11920/20466/12545/69716/114714/20877/235559/18817/12144/67052/12534/12649/70891/23834/67141/12428/70385/15512/21335/11799/268697/66197/12236/18647/18795/19211/229776/328440/52004	54
Biological process	GO:0007130	synaptonemal complex assembly	19/494	22/23174	1.81398e-29	2.01099e-27	1.05686e-27	110147/217716/56739/224727/69716/71846/26972/75459/83558/12877/74075/67981/104271/20957/66654/20962/76850/668929/240697	19
Biological process	GO:0051054	positive regulation of DNA metabolic process	45/494	244/23174	5.31562e-29	5.75899e-27	3.0266e-27	12189/19017/108058/21803/11651/18591/16476/26413/20779/12028/56637/21750/70238/12540/13649/22589/13870/58230/18861/54427/17350/15499/54418/17535/52864/12566/11920/22594/214901/213389/17685/21849/12545/71890/20877/12144/12534/15519/19361/18005/19229/17171/22210/14632/328440	45
Biological process	GO:0033044	regulation of chromosome organization	52/494	354/23174	2.20357e-28	2.33431e-26	1.22678e-26	71175/12189/21803/110147/17863/50505/26413/22059/20779/19357/21750/17120/22589/52463/13870/69260/13436/218914/12237/13018/226026/244329/17535/52864/11920/22594/20937/21849/20466/69716/20877/18817/30939/67052/12649/171506/23834/67141/70385/68549/71241/21335/11799/268697/18005/12236/12053/16905/22210/664799/107970/17451	52
Biological process	GO:0140014	mitotic nuclear division	45/494	256/23174	4.54101e-28	4.70587e-26	2.47314e-26	71175/218294/13614/21803/18591/21926/12576/19357/12540/17120/22589/13982/16211/12237/99412/226026/11920/228421/16319/73804/50796/69716/20877/72415/68298/230936/18817/30939/67052/72119/12649/23834/67141/70385/21335/11799/268697/18005/107995/105988/20878/12236/229776/20843/328440	45
Biological process	GO:1901990	regulation of mitotic cell cycle phase transition	45/494	258/23174	6.41536e-28	6.50681e-26	3.41961e-26	12189/108058/218294/21803/11651/12567/12576/22059/19357/17120/216166/13649/99375/57261/12237/13205/12578/81702/17535/12531/12566/11920/20466/12545/69716/114714/20877/235559/18817/12144/67052/12534/12649/23834/67141/70385/15512/11799/268697/12236/18795/19211/229776/328440/52004	45
Biological process	GO:0007141	male meiosis I	18/494	22/23174	4.11018e-27	4.08192e-25	2.14523e-25	224826/69260/54427/20437/56739/17864/74691/74369/69716/114714/22187/114642/26972/15512/13404/71241/83456/12190	18
Biological process	GO:0000724	double-strand break repair via homologous recombination	32/494	127/23174	2.09007e-25	1.99268e-23	1.04724e-23	71175/12189/19366/50505/22632/71567/71711/56626/226026/17535/56739/52864/11920/22594/67241/15270/12545/71890/60530/114714/19362/12144/12649/66634/13404/12190/19361/104271/19364/668929/384619/240697	32
Biological process	GO:0000725	recombinational repair	32/494	127/23174	2.09007e-25	1.99268e-23	1.04724e-23	71175/12189/19366/50505/22632/71567/71711/56626/226026/17535/56739/52864/11920/22594/67241/15270/12545/71890/60530/114714/19362/12144/12649/66634/13404/12190/19361/104271/19364/668929/384619/240697	32
Biological process	GO:0046661	male sex differentiation	34/494	152/23174	4.55564e-25	4.25819e-23	2.23786e-23	16867/14180/12028/19401/56218/22589/13870/27356/100986/11835/65247/13982/69260/13363/11614/14087/56739/16336/228421/17685/12316/50796/22187/56449/83558/73679/104271/320558/22417/12050/14308/76850/54562/668929	34
Biological process	GO:0008584	male gonad development	31/494	120/23174	5.21455e-25	4.78034e-23	2.51227e-23	16867/14180/12028/19401/56218/22589/13870/27356/100986/11835/13982/69260/13363/11614/14087/56739/16336/228421/17685/12316/50796/22187/56449/83558/73679/22417/12050/14308/76850/54562/668929	31
Biological process	GO:0007143	female meiotic nuclear division	20/494	35/23174	6.19655e-25	5.57338e-23	2.92905e-23	13164/54204/217716/17350/15499/223989/54418/12531/11920/381759/69716/114714/22187/18817/67141/68549/20878/50878/320558/20962	20
Biological process	GO:0046546	development of primary male sexual characteristics	31/494	121/23174	6.87454e-25	6.06869e-23	3.18936e-23	16867/14180/12028/19401/56218/22589/13870/27356/100986/11835/13982/69260/13363/11614/14087/56739/16336/228421/17685/12316/50796/22187/56449/83558/73679/22417/12050/14308/76850/54562/668929	31
Biological process	GO:0051983	regulation of chromosome segregation	29/494	102/23174	8.72026e-25	7.55808e-23	3.9721e-23	71175/19357/17120/22589/218914/12237/226026/11920/67241/214901/73804/58186/69716/20877/18817/30939/67052/23834/67141/70385/68549/13605/21335/11799/268697/18005/12236/67981/17451	29
Biological process	GO:0010948	negative regulation of cell cycle process	39/494	225/23174	3.1824e-24	2.70902e-22	1.42371e-22	19355/12189/22768/218294/12567/22059/19357/17120/22589/13982/218914/56371/12237/17535/11920/12317/50796/69716/20877/235559/18817/30939/12144/67052/12534/12649/23834/67141/70385/11799/268697/18005/12236/67981/19211/20843/378430/52004/17451	39
Biological process	GO:0051304	chromosome separation	27/494	92/23174	1.42725e-23	1.19363e-21	6.27303e-22	50505/19357/17120/71711/17350/12237/52864/11920/69716/20877/68298/18817/30939/67052/23834/67141/55993/70385/110958/21335/11799/83558/268697/105988/12236/20962/17451	27
Biological process	GO:0000075	cell cycle checkpoint	34/494	174/23174	5.05108e-23	4.15146e-21	2.18177e-21	19355/12189/22768/218294/21803/26416/225160/22059/17120/71711/99375/18004/71702/56371/12237/17535/11920/17685/381759/69716/20877/117229/235559/18817/12144/67052/12534/12649/23834/70385/11799/268697/12236/67981	34
Biological process	GO:0007088	regulation of mitotic nuclear division	33/494	162/23174	5.52011e-23	4.46006e-21	2.34395e-21	71175/218294/13614/21803/18591/21926/12576/19357/12540/17120/22589/13982/12237/226026/11920/50796/69716/20877/18817/30939/67052/12649/23834/67141/70385/21335/11799/268697/18005/12236/229776/20843/328440	33
Biological process	GO:0045930	negative regulation of mitotic cell cycle	38/494	232/23174	1.02089e-22	8.11093e-21	4.26264e-21	12189/218294/21803/21926/11350/12576/22059/19357/17120/13649/22589/71711/13982/12237/244329/17535/11920/17685/381759/69716/20877/117229/235559/18817/30939/12144/67052/12534/12649/23834/67141/70385/11799/268697/12236/19211/229776/52004	38
Biological process	GO:0048599	oocyte development	21/494	49/23174	1.18059e-22	9.22604e-21	4.84868e-21	13164/18159/230103/381022/56739/12531/16336/11920/381759/50796/69716/67141/14566/13404/12190/268697/20878/22417/18795/19229/54611	21
Biological process	GO:0010639	negative regulation of organelle organization	48/494	399/23174	2.1055e-22	1.61886e-20	8.50781e-21	19355/12189/22768/19017/17755/11651/110147/50505/22059/20779/19357/21750/242687/17120/22589/52463/13870/13982/13436/218914/12237/52864/11920/22594/16765/20466/50796/74187/69716/20877/18817/30939/67052/12649/171506/67141/70385/11799/268697/18005/12236/67981/67588/16905/22210/378430/107970/17451	48
Biological process	GO:0051784	negative regulation of nuclear division	23/494	66/23174	3.26626e-22	2.47147e-20	1.29887e-20	19355/22768/19357/17120/22589/13982/12237/11920/50796/69716/20877/18817/30939/67052/12649/67141/70385/11799/268697/12236/67981/378430/17451	23
Biological process	GO:0009994	oocyte differentiation	21/494	53/23174	8.88543e-22	6.61826e-20	3.47818e-20	13164/18159/230103/381022/56739/12531/16336/11920/381759/50796/69716/67141/14566/13404/12190/268697/20878/22417/18795/19229/54611	21
Biological process	GO:0007062	sister chromatid cohesion	21/494	56/23174	3.54736e-21	2.60158e-19	1.36724e-19	71175/19357/22589/218914/226026/17535/56739/75828/114714/72415/30939/68549/107995/12236/50878/67981/71988/140557/20962/20843/668929	21
Biological process	GO:0044839	cell cycle G2/M phase transition	28/494	127/23174	1.12939e-20	8.15725e-19	4.28698e-19	12189/108058/218294/12567/19357/57261/56371/12578/17535/12531/12566/11920/20466/12545/114714/235559/18817/12144/12534/12649/23834/67141/12428/15512/11799/268697/18647/18795	28
Biological process	GO:0045931	positive regulation of mitotic cell cycle	31/494	166/23174	1.7466e-20	1.24269e-18	6.53088e-19	71175/108058/13614/21803/11651/12567/18591/21926/11350/13649/99375/18472/57261/15499/13205/81702/226026/12531/20466/12545/50796/114714/67052/12534/67141/15512/11799/12190/268697/67117/18795	31
Biological process	GO:0000070	mitotic sister chromatid segregation	29/494	144/23174	3.37091e-20	2.32886e-18	1.22392e-18	71175/19357/17120/22589/16211/12237/226026/11920/228421/16319/73804/69716/20877/72415/68298/230936/18817/30939/67052/23834/67141/70385/21335/11799/268697/18005/107995/105988/12236	29
Biological process	GO:2001251	negative regulation of chromosome organization	29/494	144/23174	3.37091e-20	2.32886e-18	1.22392e-18	12189/50505/20779/19357/21750/17120/22589/52463/13870/13436/218914/12237/52864/11920/22594/20466/69716/20877/18817/30939/67052/171506/67141/70385/11799/268697/12236/22210/107970	29
Biological process	GO:0009314	response to radiation	45/494	394/23174	3.76356e-20	2.56298e-18	1.34696e-18	19355/71175/12189/19366/11548/12288/11651/26416/50505/16476/22632/22059/20869/12568/12028/70238/26420/13649/13870/58230/53418/18004/15194/211651/15499/14375/16590/11920/68026/17685/15270/60530/58186/20877/235559/19362/12144/12649/13605/12190/19361/105787/12359/18708/22210	45
Biological process	GO:0000086	G2/M transition of mitotic cell cycle	26/494	110/23174	4.16362e-20	2.79549e-18	1.46915e-18	12189/108058/12567/19357/57261/12578/17535/12531/12566/11920/20466/12545/114714/235559/18817/12144/12534/12649/23834/67141/12428/15512/11799/268697/18647/18795	26
Biological process	GO:0016569	covalent chromatin modification	47/494	443/23174	1.12304e-19	7.43544e-18	3.90765e-18	21402/71175/12189/20592/21803/110147/17863/22059/12568/59026/224826/70238/22589/52463/19763/58230/232811/57261/69260/75605/22367/13436/433759/13435/13018/381022/12566/11920/67773/20937/64707/213389/20586/21849/20466/20877/15201/18140/12649/12428/71241/12190/268697/12053/16905/22210/664799	47
Biological process	GO:1902749	regulation of cell cycle G2/M phase transition	24/494	94/23174	1.63959e-19	1.07067e-17	5.62684e-18	12189/108058/218294/12567/19357/57261/56371/12578/17535/12531/12566/11920/20466/12545/114714/235559/18817/12144/12534/12649/23834/67141/15512/268697	24
Biological process	GO:0001556	oocyte maturation	16/494	31/23174	3.20167e-19	2.06248e-17	1.08392e-17	13164/18159/230103/56739/12531/16336/381759/69716/67141/13404/12190/268697/20878/18795/19229/54611	16
Biological process	GO:0006305	DNA alkylation	21/494	69/23174	5.50159e-19	3.4508e-17	1.81354e-17	12189/110147/56637/52463/13436/54427/606496/13435/13018/17450/20586/21849/74691/15201/171506/74068/83456/98558/330890/94244/664799	21
Biological process	GO:0006306	DNA methylation	21/494	69/23174	5.50159e-19	3.4508e-17	1.81354e-17	12189/110147/56637/52463/13436/54427/606496/13435/13018/17450/20586/21849/74691/15201/171506/74068/83456/98558/330890/94244/664799	21
Biological process	GO:0051446	positive regulation of meiotic cell cycle	15/494	27/23174	9.50063e-19	5.88175e-17	3.09111e-17	13164/17701/230861/12531/213389/50796/67141/68549/22417/18795/17702/16848/22210/328440/671232	15
Biological process	GO:0048732	gland development	47/494	467/23174	9.63768e-19	5.89011e-17	3.0955e-17	381489/21803/22282/12724/18591/21926/17863/11350/16476/26413/12576/20869/20779/12028/16438/20683/17120/19401/17701/13649/11835/19242/18970/13982/11634/14595/75605/15904/12234/11614/12578/17126/26395/11920/20586/12190/20878/22417/102247/12633/19211/17702/18119/20181/22061/20496/14632	47
Biological process	GO:0033045	regulation of sister chromatid segregation	22/494	81/23174	1.24735e-18	7.5267e-17	3.95561e-17	71175/19357/17120/22589/218914/12237/226026/11920/69716/20877/18817/30939/67052/23834/67141/70385/68549/21335/11799/268697/12236/17451	22
Biological process	GO:0010212	response to ionizing radiation	26/494	125/23174	1.30462e-18	7.7739e-17	4.08552e-17	19355/71175/12189/19366/26416/22059/20869/12028/70238/13870/58230/18004/211651/15499/14375/11920/17685/15270/60530/235559/19362/12144/13605/12190/19361/105787	26
Biological process	GO:0051053	negative regulation of DNA metabolic process	28/494	153/23174	2.23595e-18	1.3159e-16	6.9156e-17	50505/225160/22059/20779/21750/52463/13870/18159/218914/54427/17350/15499/17535/52864/11920/22594/17685/21849/71890/58186/12144/12649/171506/67141/12190/12053/20843/107970	28
Biological process	GO:0048515	spermatid differentiation	33/494	225/23174	2.3047e-18	1.33982e-16	7.04132e-17	22768/76407/110147/20869/12028/66722/27356/83964/58230/15463/18472/69260/18747/13363/16590/56739/22702/19725/74369/69716/57749/26972/239083/15512/13404/71241/75514/20957/20962/22210/68231/53422/671232	33
Biological process	GO:0051985	negative regulation of chromosome segregation	18/494	48/23174	2.46345e-18	1.41485e-16	7.43565e-17	19357/17120/22589/218914/12237/11920/214901/69716/20877/18817/30939/67052/67141/70385/11799/268697/12236/17451	18
Biological process	GO:0044728	DNA methylation or demethylation	22/494	84/23174	2.96227e-18	1.68109e-16	8.83484e-17	12189/110147/211064/56637/52463/13436/54427/606496/13435/13018/17450/20586/21849/74691/15201/171506/74068/83456/98558/330890/94244/664799	22
Biological process	GO:0034502	protein localization to chromosome	22/494	85/23174	3.91876e-18	2.19774e-16	1.155e-16	71175/19357/21750/22589/71567/13982/218914/12237/13018/17685/20877/18817/67052/12534/66634/26972/70385/12190/12236/50878/71988/104271	22
Biological process	GO:0016570	histone modification	44/494	426/23174	4.88793e-18	2.70939e-16	1.4239e-16	21402/71175/12189/20592/21803/110147/17863/22059/12568/59026/224826/70238/22589/52463/19763/58230/232811/57261/69260/75605/22367/13436/433759/13018/381022/12566/11920/67773/20937/64707/213389/20586/20466/20877/18140/12649/12428/71241/12190/268697/12053/16905/22210/664799	44
Biological process	GO:0007286	spermatid development	32/494	216/23174	5.62683e-18	3.08311e-16	1.62031e-16	22768/76407/110147/20869/66722/27356/83964/58230/15463/18472/69260/18747/13363/16590/56739/22702/19725/74369/69716/57749/26972/239083/15512/13404/71241/75514/20957/20962/22210/68231/53422/671232	32
Biological process	GO:0010389	regulation of G2/M transition of mitotic cell cycle	21/494	78/23174	9.34093e-18	5.06002e-16	2.65926e-16	12189/108058/12567/19357/57261/12578/17535/12531/12566/11920/20466/12545/114714/235559/12144/12534/12649/23834/67141/15512/268697	21
Biological process	GO:0071103	DNA conformation change	31/494	210/23174	2.08586e-17	1.11723e-15	5.8715e-16	71175/11350/56086/22059/22589/71567/58230/21976/218914/13018/12578/244329/17535/20937/213389/20586/15201/68298/57749/230936/12144/12534/171506/76044/110958/19361/268697/20957/20962/68231/107970	31
Biological process	GO:0006260	DNA replication	33/494	243/23174	2.48645e-17	1.31699e-15	6.92134e-16	110147/16476/225160/22059/12540/13649/22589/71567/18970/218914/56626/81702/17535/52864/12566/68026/214901/20466/12545/12144/12534/23834/66634/67141/12428/12190/19361/20899/71988/17171/20843/14632/328440	33
Biological process	GO:0045836	positive regulation of meiotic nuclear division	12/494	17/23174	4.3342e-17	2.27045e-15	1.19322e-15	13164/17701/230861/213389/50796/67141/68549/22417/18795/17702/22210/328440	12
Biological process	GO:1901989	positive regulation of cell cycle phase transition	22/494	96/23174	6.65755e-17	3.44962e-15	1.81293e-15	108058/21803/11651/12567/13649/99375/57261/13205/81702/12531/20466/12545/114714/12534/67141/15512/11799/268697/18795/22061/14632/671232	22
Biological process	GO:0006304	DNA modification	22/494	97/23174	8.44251e-17	4.32747e-15	2.27427e-15	12189/110147/211064/56637/52463/13436/54427/606496/13435/13018/17450/20586/21849/74691/15201/171506/74068/83456/98558/330890/94244/664799	22
Biological process	GO:0046660	female sex differentiation	26/494	147/23174	8.94924e-17	4.53841e-15	2.38513e-15	16867/26362/20779/12028/17311/17289/13982/22174/14087/16590/11920/18291/12155/22187/26972/14566/55993/13404/12190/11576/22417/229357/14308/16848/22061/16875	26
Biological process	GO:0034504	protein localization to nucleus	34/494	271/23174	9.58906e-17	4.81169e-15	2.52875e-15	21402/21803/235320/16646/14180/11651/26416/26413/20610/22059/20869/20779/12568/56637/17701/230673/230908/22218/16211/15194/14360/12578/77053/16648/12317/21849/20466/18817/12534/13605/18708/16905/16649/223697	34
Biological process	GO:0033047	regulation of mitotic sister chromatid segregation	19/494	67/23174	1.17364e-16	5.82783e-15	3.06278e-15	71175/19357/17120/22589/12237/226026/11920/69716/20877/18817/30939/67052/23834/67141/70385/21335/11799/268697/12236	19
Biological process	GO:0006312	mitotic recombination	13/494	24/23174	3.23604e-16	1.59033e-14	8.35787e-15	50505/21750/13870/17350/226026/22594/67241/114714/12144/13404/12190/19361/19364	13
Biological process	GO:0007093	mitotic cell cycle checkpoint	24/494	128/23174	3.46183e-16	1.68393e-14	8.84978e-15	12189/21803/22059/17120/71711/12237/17535/11920/17685/381759/69716/20877/117229/235559/18817/12144/67052/12534/12649/23834/70385/11799/268697/12236	24
Biological process	GO:0033046	negative regulation of sister chromatid segregation	16/494	45/23174	5.23511e-16	2.52078e-14	1.32478e-14	19357/17120/22589/218914/12237/11920/69716/20877/18817/30939/67052/67141/70385/11799/268697/12236	16
Biological process	GO:1901988	negative regulation of cell cycle phase transition	26/494	158/23174	5.5969e-16	2.66804e-14	1.40217e-14	12189/218294/22059/19357/17120/56371/12237/17535/11920/69716/20877/235559/18817/12144/67052/12534/12649/23834/67141/70385/11799/268697/12236/19211/52004/17451	26
Biological process	GO:0006275	regulation of DNA replication	22/494	106/23174	6.30764e-16	2.97708e-14	1.56458e-14	110147/16476/22059/12540/13649/22589/218914/81702/17535/12566/214901/12545/12144/12534/67141/12428/12190/71988/17171/20843/14632/328440	22
Biological process	GO:0045839	negative regulation of mitotic nuclear division	17/494	54/23174	6.72861e-16	3.14464e-14	1.65264e-14	19357/17120/22589/13982/12237/11920/69716/20877/18817/30939/67052/12649/67141/70385/11799/268697/12236	17
Biological process	GO:0051303	establishment of chromosome localization	19/494	75/23174	1.19096e-15	5.50887e-14	2.89515e-14	54204/17120/16211/17350/54418/77053/11920/228421/73804/74369/67052/26972/70385/11799/12190/268697/22210/668929/384619	19
Biological process	GO:2000242	negative regulation of reproductive process	18/494	65/23174	1.20185e-15	5.50887e-14	2.89515e-14	19355/22768/12576/20869/18159/18747/230103/12317/381759/50796/69716/67141/67981/22417/229357/18119/378430/17451	18
Biological process	GO:0016458	gene silencing	32/494	260/23174	1.3714e-15	6.22615e-14	3.27211e-14	83557/21803/22059/224826/15568/13649/52463/13982/13436/18983/433759/13435/26395/381022/12566/20937/20586/21849/20466/74691/15201/57749/171506/74068/83456/98558/330890/76850/22210/18033/94244/107970	32
Biological process	GO:0050000	chromosome localization	19/494	76/23174	1.55702e-15	7.0022e-14	3.67996e-14	54204/17120/16211/17350/54418/77053/11920/228421/73804/74369/67052/26972/70385/11799/12190/268697/22210/668929/384619	19
Biological process	GO:0007568	aging	31/494	244/23174	1.57359e-15	7.01055e-14	3.68435e-14	19366/11651/26416/11350/26413/22059/21750/233489/13870/69260/15194/56371/606496/12578/226026/26395/11920/12317/20937/67241/17685/20466/12534/67141/12190/12053/16591/12801/19211/16905/22061	31
Biological process	GO:0051785	positive regulation of nuclear division	19/494	77/23174	2.02683e-15	8.94618e-14	4.7016e-14	71175/13164/13614/21803/18591/21926/17701/230861/226026/213389/50796/67141/68549/11799/22417/18795/17702/22210/328440	19
Biological process	GO:0040029	regulation of gene expression, epigenetic	33/494	282/23174	2.18194e-15	9.54251e-14	5.015e-14	83557/12189/22768/21803/22059/56637/224826/15568/13649/52463/13982/13436/433759/606496/13435/13018/26395/381022/17450/20937/20586/21849/20466/15201/12649/171506/83456/98558/76850/22210/18033/664799/107970	33
Biological process	GO:2001252	positive regulation of chromosome organization	27/494	182/23174	2.22541e-15	9.6441e-14	5.06839e-14	71175/12189/21803/17863/26413/22059/19357/21750/22589/52463/13870/69260/13436/226026/17535/52864/11920/20937/21849/20466/20877/68549/71241/268697/18005/12053/16905	27
Biological process	GO:0051098	regulation of binding	39/494	399/23174	2.61198e-15	1.11603e-13	5.86519e-14	71175/21803/11651/18591/11350/50505/16476/20610/20779/12568/12028/15525/56637/12540/19401/17701/22218/57261/15901/218914/15904/99412/15499/12578/17126/110213/20586/16765/21849/20466/71890/20877/18817/12144/18005/20878/17702/16848/53422	39
Biological process	GO:0008585	female gonad development	22/494	113/23174	2.62209e-15	1.11603e-13	5.86519e-14	16867/20779/12028/17311/13982/14087/16590/11920/18291/12155/22187/26972/14566/55993/13404/12190/11576/22417/229357/14308/16848/16875	22
Biological process	GO:1905819	negative regulation of chromosome separation	15/494	42/23174	4.02104e-15	1.69631e-13	8.91484e-14	19357/17120/12237/11920/69716/20877/18817/30939/67052/67141/70385/11799/268697/12236/17451	15
Biological process	GO:2000243	positive regulation of reproductive process	19/494	80/23174	4.36185e-15	1.82394e-13	9.58561e-14	13164/20779/17701/11835/230861/12531/213389/50796/67141/68549/20878/22417/18795/17702/16848/54611/22210/328440/671232	19
Biological process	GO:0048511	rhythmic process	33/494	289/23174	4.48635e-15	1.85969e-13	9.77346e-14	19017/16867/103583/26362/22059/20779/12568/56637/59026/20683/26420/13649/23957/230908/19242/13982/22174/15901/75605/15904/433759/12234/18044/20937/64707/20466/12534/14566/11576/105787/229357/19211/14308	33
Biological process	GO:0046545	development of primary female sexual characteristics	22/494	116/23174	4.67358e-15	1.9206e-13	1.00936e-13	16867/20779/12028/17311/13982/14087/16590/11920/18291/12155/22187/26972/14566/55993/13404/12190/11576/22417/229357/14308/16848/16875	22
Biological process	GO:0033048	negative regulation of mitotic sister chromatid segregation	15/494	43/23174	6.05556e-15	2.46725e-13	1.29665e-13	19357/17120/22589/12237/11920/69716/20877/18817/30939/67052/67141/70385/11799/268697/12236	15
Biological process	GO:0001701	in utero embryonic development	43/494	498/23174	7.84965e-15	3.17112e-13	1.66656e-13	13614/30957/11651/18591/17863/26413/22059/211064/21750/20683/17701/13649/52463/11835/77579/99375/57261/16330/54427/15499/17126/26395/381022/16336/20937/17685/20586/21849/20466/22702/12649/76044/56449/239083/12190/268697/18005/73679/67981/18119/20181/22210/328440	43
Biological process	GO:1905818	regulation of chromosome separation	17/494	62/23174	9.02062e-15	3.60228e-13	1.89315e-13	19357/17120/12237/11920/69716/20877/18817/30939/67052/23834/67141/70385/21335/11799/268697/12236/17451	17
Biological process	GO:1901992	positive regulation of mitotic cell cycle phase transition	19/494	83/23174	9.06803e-15	3.60228e-13	1.89315e-13	108058/21803/11651/12567/13649/99375/57261/13205/81702/12531/20466/12545/114714/12534/67141/15512/11799/268697/18795	19
Biological process	GO:2001020	regulation of response to DNA damage stimulus	28/494	209/23174	9.66034e-15	3.80585e-13	2.00014e-13	12189/22062/11350/50505/225160/22059/70238/13649/13870/58230/99375/18004/15499/12578/54418/59004/11920/22594/20937/21849/71890/60530/19362/12144/12649/67141/19361/104271	28
Biological process	GO:0035265	organ growth	28/494	215/23174	2.00402e-14	7.71293e-13	4.05347e-13	108058/11548/22062/13614/12288/14180/11651/110147/26416/22632/26413/56637/19401/11835/13982/18159/606496/17126/12534/56449/268697/98558/19211/17702/74131/13052/20181/14632	28
Biological process	GO:0000723	telomere maintenance	22/494	124/23174	2.00421e-14	7.71293e-13	4.05347e-13	50505/26413/20779/21750/22589/13870/14375/226026/17535/52864/11920/22594/67241/114714/20877/12144/15519/12190/19361/18005/16905/19364	22
Biological process	GO:0030900	forebrain development	37/494	383/23174	2.0063e-14	7.71293e-13	4.05347e-13	22062/30957/12558/26362/20779/12568/12028/56637/18222/17701/13649/22589/77579/18472/22174/15194/15904/433759/14360/244329/110350/77053/22594/20586/12316/19378/22187/21335/22417/18795/19211/67269/223697/545428/16875/14632/211323	37
Biological process	GO:0031570	DNA integrity checkpoint	21/494	111/23174	2.0713e-14	7.89912e-13	4.15133e-13	19355/12189/218294/26416/225160/22059/71711/99375/18004/71702/56371/17535/11920/17685/117229/235559/18817/12144/12534/12649/23834	21
Biological process	GO:0006323	DNA packaging	25/494	169/23174	2.62863e-14	9.94499e-13	5.22652e-13	71175/56086/22059/22589/58230/218914/13018/12578/244329/20937/213389/20586/15201/68298/57749/230936/12534/171506/76044/110958/268697/20957/20962/68231/107970	25
Biological process	GO:0010965	regulation of mitotic sister chromatid separation	16/494	56/23174	2.71804e-14	1.02023e-12	5.36173e-13	19357/17120/12237/11920/69716/20877/18817/30939/67052/23834/67141/70385/21335/11799/268697/12236	16
Biological process	GO:0032200	telomere organization	22/494	126/23174	2.83301e-14	1.05508e-12	5.54487e-13	50505/26413/20779/21750/22589/13870/14375/226026/17535/52864/11920/22594/67241/114714/20877/12144/15519/12190/19361/18005/16905/19364	22
Biological process	GO:0051656	establishment of organelle localization	41/494	474/23174	3.21731e-14	1.18891e-12	6.24823e-13	17755/54204/12568/56637/12540/17120/233489/77579/16211/18472/13852/15194/17350/54418/244329/26395/22223/16590/77053/11920/228421/73804/76123/74369/22187/18817/67052/26972/70385/21335/11799/12190/268697/12801/14125/223697/93742/22210/668929/384619/17451	41
Biological process	GO:1901991	negative regulation of mitotic cell cycle phase transition	23/494	141/23174	3.35299e-14	1.22952e-12	6.46164e-13	12189/22059/19357/17120/12237/17535/11920/69716/20877/235559/18817/12144/67052/12534/12649/23834/67141/70385/11799/268697/12236/19211/52004	23
Biological process	GO:0097193	intrinsic apoptotic signaling pathway	32/494	292/23174	3.76345e-14	1.36949e-12	7.19728e-13	12189/22062/21926/22059/20869/20779/12028/56637/16438/17701/18970/23939/17350/433759/13205/20437/59004/26395/110213/11920/224727/17685/60530/22187/15201/56449/12190/98558/15507/12050/18708/22061	32
Biological process	GO:2000816	negative regulation of mitotic sister chromatid separation	14/494	40/23174	4.6593e-14	1.68264e-12	8.84301e-13	19357/17120/12237/11920/69716/20877/18817/30939/67052/67141/70385/11799/268697/12236	14
Biological process	GO:0000722	telomere maintenance via recombination	10/494	15/23174	4.83289e-14	1.73221e-12	9.10351e-13	50505/21750/13870/226026/22594/67241/114714/12190/19361/19364	10
Biological process	GO:0044784	metaphase/anaphase transition of cell cycle	16/494	58/23174	5.01773e-14	1.78504e-12	9.38114e-13	19357/17120/12237/11920/69716/20877/18817/67052/23834/67141/70385/21335/11799/268697/12236/17451	16
Biological process	GO:1902100	negative regulation of metaphase/anaphase transition of cell cycle	14/494	41/23174	6.93855e-14	2.45008e-12	1.28762e-12	19357/17120/12237/11920/69716/20877/18817/67052/67141/70385/11799/268697/12236/17451	14
Biological process	GO:0051306	mitotic sister chromatid separation	16/494	60/23174	9.0276e-14	3.16431e-12	1.66298e-12	19357/17120/12237/11920/69716/20877/18817/30939/67052/23834/67141/70385/21335/11799/268697/12236	16
Biological process	GO:0071900	regulation of protein serine/threonine kinase activity	38/494	425/23174	1.03215e-13	3.59144e-12	1.88746e-12	22062/13614/30957/21803/11651/18591/21926/11350/12576/108099/20869/20779/54635/56637/17311/13649/23939/15194/13205/12578/12427/12580/26395/22223/16590/381759/18817/12144/70891/23834/12428/268697/12520/14125/19211/21754/19229/17451	38
Biological process	GO:0051447	negative regulation of meiotic cell cycle	11/494	21/23174	1.07637e-13	3.71817e-12	1.95406e-12	19355/22768/18159/18747/230103/50796/69716/67141/67981/378430/17451	11
Biological process	GO:0007051	spindle organization	24/494	165/23174	1.27467e-13	4.37147e-12	2.2974e-12	54204/22589/16211/17350/99412/74237/16765/12316/76123/20877/18817/67052/72119/67141/21335/11799/268697/18005/107995/105988/20878/20843/384619/17451	24
Biological process	GO:0022612	gland morphogenesis	23/494	150/23174	1.31439e-13	4.47548e-12	2.35206e-12	21803/18591/21926/20779/12028/16438/13649/11835/19242/18970/13982/14595/75605/15904/12234/12578/22417/12633/17702/20181/22061/20496/14632	23
Biological process	GO:0051100	negative regulation of binding	24/494	168/23174	1.91372e-13	6.47001e-12	3.40027e-12	11651/18591/50505/16476/20610/12028/15525/56637/17701/22218/15901/218914/15904/99412/12578/110213/16765/20466/71890/20877/18005/20878/17702/53422	24
Biological process	GO:0071478	cellular response to radiation	23/494	154/23174	2.33627e-13	7.84297e-12	4.12182e-12	19355/71175/26416/50505/22632/22059/20869/12028/70238/26420/13870/15499/14375/11920/15270/60530/20877/19362/12144/12649/13605/19361/18708	23
Biological process	GO:1902099	regulation of metaphase/anaphase transition of cell cycle	15/494	54/23174	2.78909e-13	9.29763e-12	4.8863e-12	19357/17120/12237/11920/69716/20877/18817/67052/23834/67141/70385/11799/268697/12236/17451	15
Biological process	GO:0007091	metaphase/anaphase transition of mitotic cell cycle	15/494	55/23174	3.76076e-13	1.24497e-11	6.54284e-12	19357/17120/12237/11920/69716/20877/18817/67052/23834/67141/70385/21335/11799/268697/12236	15
Biological process	GO:0000077	DNA damage checkpoint	19/494	101/23174	4.05894e-13	1.33441e-11	7.01291e-12	19355/12189/218294/26416/225160/22059/71711/99375/18004/71702/56371/17535/11920/17685/117229/18817/12144/12534/12649	19
Biological process	GO:0050673	epithelial cell proliferation	37/494	424/23174	4.62698e-13	1.51074e-11	7.9396e-12	21803/14180/11651/18591/21926/16476/26413/12576/20869/12028/16438/20683/12540/13649/13039/11835/19242/13982/14595/15901/75605/12234/12578/26395/16590/19378/18140/11799/12190/12633/12050/19211/14308/18119/13052/22061/14632	37
Biological process	GO:0000018	regulation of DNA recombination	19/494	103/23174	5.88054e-13	1.90697e-11	1.0022e-11	21803/225160/21750/18861/17350/213389/17685/71890/60530/58186/19362/12144/12649/171506/19361/104271/12053/22210/107970	19
Biological process	GO:0071695	anatomical structure maturation	24/494	177/23174	6.14853e-13	1.98041e-11	1.04079e-11	13164/56386/18591/56637/56336/18159/230103/81702/56739/12531/16336/381759/69716/19378/67141/13404/12190/268697/20878/102247/18795/17702/19229/54611	24
Biological process	GO:0033674	positive regulation of kinase activity	39/494	475/23174	7.26575e-13	2.32455e-11	1.22165e-11	22062/13614/30957/21803/11651/18591/21926/11350/12576/108099/80915/20869/20779/12568/54635/17311/12540/13649/18004/13205/14375/26395/17535/16590/12531/108679/72119/15519/70891/23834/76044/13605/18173/12520/14125/19229/17171/211323/17451	39
Biological process	GO:0043414	macromolecule methylation	30/494	286/23174	7.56731e-13	2.40489e-11	1.26387e-11	12189/110147/17863/56637/22589/52463/232811/13436/54427/606496/13435/13018/381022/17450/20937/64707/213389/20586/21849/74691/15201/171506/74068/71241/83456/98558/330890/16905/94244/664799	30
Biological process	GO:0045841	negative regulation of mitotic metaphase/anaphase transition	13/494	39/23174	7.86542e-13	2.48308e-11	1.30496e-11	19357/17120/12237/11920/69716/20877/18817/67052/67141/70385/11799/268697/12236	13
Biological process	GO:0060249	anatomical structure homeostasis	35/494	393/23174	1.12588e-12	3.53098e-11	1.85568e-11	21803/50505/26413/20869/20779/12028/21750/13649/22589/13870/22174/14375/226026/17535/52864/11920/22594/67241/114714/20877/12144/15519/12190/19361/18005/104271/105787/12801/330890/14308/16905/19229/74131/13052/19364	35
Biological process	GO:0043046	DNA methylation involved in gamete generation	10/494	19/23174	1.377e-12	4.29028e-11	2.25473e-11	54427/13435/17450/74691/74068/83456/98558/330890/94244/664799	10
Biological process	GO:0000079	regulation of cyclin-dependent protein serine/threonine kinase activity	16/494	71/23174	1.55743e-12	4.82094e-11	2.53361e-11	11651/18591/12576/20779/13649/12578/12427/12580/381759/18817/12144/70891/23834/12428/268697/19211	16
Biological process	GO:0007569	cell aging	22/494	154/23174	1.95803e-12	6.02191e-11	3.16477e-11	26416/11350/22059/21750/13870/69260/15194/56371/12578/226026/26395/11920/12317/20937/67241/12534/67141/12190/12053/19211/16905/22061	22
Biological process	GO:0030071	regulation of mitotic metaphase/anaphase transition	14/494	51/23174	2.09429e-12	6.39967e-11	3.3633e-11	19357/17120/12237/11920/69716/20877/18817/67052/23834/67141/70385/11799/268697/12236	14
Biological process	GO:0010971	positive regulation of G2/M transition of mitotic cell cycle	11/494	27/23174	3.54419e-12	1.07613e-10	5.6555e-11	108058/12567/57261/12531/20466/12545/114714/12534/67141/15512/268697	11
Biological process	GO:1904029	regulation of cyclin-dependent protein kinase activity	16/494	75/23174	3.84589e-12	1.16034e-10	6.09807e-11	11651/18591/12576/20779/13649/12578/12427/12580/381759/18817/12144/70891/23834/12428/268697/19211	16
Biological process	GO:0045860	positive regulation of protein kinase activity	36/494	437/23174	5.21427e-12	1.5633e-10	8.2158e-11	22062/13614/30957/21803/11651/18591/21926/11350/12576/108099/20869/20779/12568/54635/17311/13649/18004/13205/14375/26395/16590/12531/108679/72119/15519/70891/23834/76044/13605/18173/12520/14125/19229/17171/211323/17451	36
Biological process	GO:1902275	regulation of chromatin organization	24/494	197/23174	6.43625e-12	1.9176e-10	1.00778e-10	71175/12189/21803/110147/17863/22059/22589/52463/69260/13436/13018/11920/20937/21849/20466/12649/171506/71241/268697/12053/16905/22210/664799/107970	24
Biological process	GO:0018105	peptidyl-serine phosphorylation	30/494	311/23174	6.51556e-12	1.92917e-10	1.01386e-10	108058/21803/11651/26416/18591/21926/26413/20779/12568/12028/56637/26420/13649/100986/23939/18747/22367/606496/227743/12566/11920/12545/71890/20877/18817/12534/15519/268697/105787/17164	30
Biological process	GO:0048638	regulation of developmental growth	34/494	399/23174	8.17567e-12	2.40577e-10	1.26433e-10	71175/22062/13614/17755/12288/14180/11651/12567/26416/11350/22632/26413/12576/12568/56637/233489/11835/18159/18472/606496/15499/20437/20937/12534/56449/268697/98558/102247/18795/19211/74131/13052/14632/211323	34
Biological process	GO:0046777	protein autophosphorylation	26/494	239/23174	1.15143e-11	3.36739e-10	1.76971e-10	108058/26416/18591/11350/16476/26931/20869/20779/12568/54635/56637/13649/57261/22174/18747/22367/14360/17535/16590/11920/21849/117229/18005/17164/21754/19229	26
Biological process	GO:0044843	cell cycle G1/S phase transition	23/494	185/23174	1.16615e-11	3.38965e-10	1.7814e-10	108058/11651/12567/17863/12576/22059/216166/13649/99375/57261/15904/13205/12578/81702/12580/12566/70891/12428/18795/19211/22061/14632/52004	23
Biological process	GO:0009411	response to UV	20/494	137/23174	1.3303e-11	3.84335e-10	2.01985e-10	11651/50505/22632/22059/20869/12028/70238/26420/13649/13870/68026/17685/58186/20877/12649/12190/105787/12359/18708/22210	20
Biological process	GO:0001541	ovarian follicle development	15/494	69/23174	1.36271e-11	3.91102e-10	2.05541e-10	16867/20779/12028/17311/13982/16590/11920/18291/12155/26972/55993/13404/229357/14308/16848	15
Biological process	GO:0031056	regulation of histone modification	21/494	153/23174	1.37013e-11	3.91102e-10	2.05541e-10	71175/12189/21803/110147/17863/22059/22589/52463/69260/13436/13018/11920/20937/20466/12649/71241/268697/12053/16905/22210/664799	21
Biological process	GO:1902751	positive regulation of cell cycle G2/M phase transition	11/494	30/23174	1.40158e-11	3.97698e-10	2.09007e-10	108058/12567/57261/12531/20466/12545/114714/12534/67141/15512/268697	11
Biological process	GO:0018205	peptidyl-lysine modification	31/494	344/23174	1.68325e-11	4.74796e-10	2.49526e-10	12189/170930/21803/110147/17863/20610/22589/22218/22196/232811/57261/13436/433759/13018/12578/59004/381022/224727/67773/20937/64707/213389/20586/21849/20466/12649/71241/12190/105787/16905/664799	31
Biological process	GO:0007135	meiosis II	8/494	12/23174	1.85142e-11	5.16124e-10	2.71245e-10	13164/75828/114714/68549/12236/50878/67981/20962	8
Biological process	GO:0061983	meiosis II cell cycle process	8/494	12/23174	1.85142e-11	5.16124e-10	2.71245e-10	13164/75828/114714/68549/12236/50878/67981/20962	8
Biological process	GO:2001233	regulation of apoptotic signaling pathway	34/494	412/23174	1.97404e-11	5.47107e-10	2.87528e-10	12189/22062/11651/21926/22059/20779/12028/56637/26420/17701/11835/23939/69260/15194/433759/606496/14360/13205/20437/59004/26395/110213/60530/22187/15201/56449/15507/22417/12633/12050/19211/16905/14573/22061	34
Biological process	GO:0051302	regulation of cell division	21/494	156/23174	1.99898e-11	5.50817e-10	2.89478e-10	218294/21803/14180/18591/54635/216166/19242/12531/16319/12316/20877/18817/12144/23834/13605/12190/20878/12359/229776/22061/52004	21
Biological process	GO:0071214	cellular response to abiotic stimulus	28/494	292/23174	3.83216e-11	1.04388e-09	5.48605e-10	19355/71175/11651/26416/50505/22632/22059/20869/12028/56637/70238/26420/13870/15499/13205/14375/11920/15270/60530/20877/19362/12144/12649/56449/13605/19361/19211/18708	28
Biological process	GO:0104004	cellular response to environmental stimulus	28/494	292/23174	3.83216e-11	1.04388e-09	5.48605e-10	19355/71175/11651/26416/50505/22632/22059/20869/12028/56637/70238/26420/13870/15499/13205/14375/11920/15270/60530/20877/19362/12144/12649/56449/13605/19361/19211/18708	28
Biological process	GO:0032259	methylation	30/494	335/23174	4.20374e-11	1.13859e-09	5.9838e-10	12189/110147/17863/56637/22589/52463/232811/13436/54427/606496/13435/13018/381022/17450/20937/64707/213389/20586/21849/74691/15201/171506/74068/71241/83456/98558/330890/16905/94244/664799	30
Biological process	GO:1902850	microtubule cytoskeleton organization involved in mitosis	19/494	130/23174	4.24644e-11	1.14366e-09	6.01043e-10	16211/18472/15194/99412/244329/16765/76123/20877/18817/67052/72119/70385/21335/11799/268697/18005/107995/20878/20843	19
Biological process	GO:0033002	muscle cell proliferation	25/494	234/23174	4.27258e-11	1.14424e-09	6.01345e-10	19017/108058/22062/13614/14180/11651/26416/18591/21926/16476/26413/12576/22059/56637/13649/13982/14375/12534/268697/12633/19211/18708/13052/20181/14632	25
Biological process	GO:0050678	regulation of epithelial cell proliferation	31/494	357/23174	4.33632e-11	1.15482e-09	6.06906e-10	21803/14180/11651/18591/21926/16476/12576/20869/12028/16438/20683/12540/13649/13039/11835/19242/13982/14595/15901/75605/12578/19378/18140/11799/12190/12633/19211/18119/13052/22061/14632	31
Biological process	GO:0018209	peptidyl-serine modification	30/494	336/23174	4.52587e-11	1.1986e-09	6.29917e-10	108058/21803/11651/26416/18591/21926/26413/20779/12568/12028/56637/26420/13649/100986/23939/18747/22367/606496/227743/12566/11920/12545/71890/20877/18817/12534/15519/268697/105787/17164	30
Biological process	GO:0090220	chromosome localization to nuclear envelope involved in homologous chromosome segregation	8/494	13/23174	4.724e-11	1.24416e-09	6.5386e-10	17350/77053/11920/74369/26972/22210/668929/384619	8
Biological process	GO:0090398	cellular senescence	14/494	63/23174	4.79391e-11	1.25564e-09	6.59891e-10	26416/11350/22059/21750/69260/12578/226026/26395/12317/20937/67241/67141/12053/22061	14
Biological process	GO:0002200	somatic diversification of immune receptors	15/494	75/23174	4.87474e-11	1.26983e-09	6.6735e-10	21803/225160/70238/13870/54125/18970/58230/18861/17350/14375/26909/11920/17685/71890/12053	15
Biological process	GO:0070997	neuron death	33/494	404/23174	5.16069e-11	1.33701e-09	7.02656e-10	19017/22062/26362/21926/11350/56086/16476/22059/12568/211064/12028/56637/16438/12540/233489/12402/18970/13982/22174/15194/433759/606496/14360/15499/20437/11920/17685/22187/11799/19229/14573/67605/22061	33
Biological process	GO:0051225	spindle assembly	17/494	102/23174	5.34004e-11	1.376e-09	7.23147e-10	54204/16211/17350/99412/74237/12316/76123/20877/18817/72119/67141/11799/18005/107995/20878/20843/384619	17
Biological process	GO:1903829	positive regulation of cellular protein localization	28/494	297/23174	5.71777e-11	1.46541e-09	7.70136e-10	71175/19042/21803/11651/26416/21926/26413/20869/20779/12568/56637/12540/13649/230908/19242/18747/606496/14360/12578/21849/76123/67052/12534/13605/105787/12520/18708/211323	28
Biological process	GO:0009566	fertilization	22/494	184/23174	7.1138e-11	1.81345e-09	9.53045e-10	114875/110147/12028/27356/11835/13852/14595/75605/56739/74691/381759/12745/56449/83558/104271/320558/98558/56746/18795/668929/328440/107970	22
Biological process	GO:0021700	developmental maturation	28/494	303/23174	9.1363e-11	2.31663e-09	1.21749e-09	13164/56386/18591/56637/233489/56336/18159/18747/230103/81702/56739/12531/16336/381759/69716/19378/67141/13404/12190/268697/107995/20878/102247/18795/19211/17702/19229/54611	28
Biological process	GO:0051307	meiotic chromosome separation	10/494	27/23174	1.07892e-10	2.71401e-09	1.42633e-09	50505/71711/17350/52864/55993/110958/83558/105988/20962/17451	10
Biological process	GO:0034397	telomere localization	8/494	14/23174	1.08173e-10	2.71401e-09	1.42633e-09	17350/77053/11920/74369/26972/22210/668929/384619	8
Biological process	GO:0002562	somatic diversification of immune receptors via germline recombination within a single locus	14/494	67/23174	1.16076e-10	2.88195e-09	1.51459e-09	21803/225160/70238/13870/18970/58230/18861/17350/14375/26909/11920/17685/71890/12053	14
Biological process	GO:0016444	somatic cell DNA recombination	14/494	67/23174	1.16076e-10	2.88195e-09	1.51459e-09	21803/225160/70238/13870/18970/58230/18861/17350/14375/26909/11920/17685/71890/12053	14
Biological process	GO:0030098	lymphocyte differentiation	32/494	395/23174	1.25861e-10	3.10869e-09	1.63375e-09	21803/235320/26362/17863/11350/22059/20869/12028/19401/56218/54125/17289/232174/11634/22174/211651/12578/14087/16590/11920/17685/15201/12144/15519/12053/22417/67588/18708/16848/22324/19229/74131	32
Biological process	GO:0006913	nucleocytoplasmic transport	27/494	287/23174	1.32835e-10	3.24731e-09	1.7066e-09	19042/21803/16646/14180/11651/26416/225160/26413/22059/12568/56637/230673/230908/16211/66011/20218/269800/18747/12578/16648/12317/21849/83454/13605/18708/16905/16649	27
Biological process	GO:0051169	nuclear transport	27/494	287/23174	1.32835e-10	3.24731e-09	1.7066e-09	19042/21803/16646/14180/11651/26416/225160/26413/22059/12568/56637/230673/230908/16211/66011/20218/269800/18747/12578/16648/12317/21849/83454/13605/18708/16905/16649	27
Biological process	GO:0036297	interstrand cross-link repair	10/494	28/23174	1.64651e-10	4.00455e-09	2.10456e-09	67030/50505/13870/71567/14087/52864/19362/66634/19361/19364	10
Biological process	GO:0000726	non-recombinational repair	13/494	57/23174	1.67117e-10	4.0439e-09	2.12524e-09	50505/13870/54125/18970/58230/17350/15499/56626/14375/17535/52864/22594/71890	13
Biological process	GO:0006979	response to oxidative stress	32/494	401/23174	1.8481e-10	4.44945e-09	2.33838e-09	19017/11651/26362/21926/11350/16476/26413/22059/20779/20683/26420/13649/13870/23939/13852/211651/433759/14360/15499/12578/26395/227743/22594/20466/13605/15507/105787/12359/12633/19229/16649/18033	32
Biological process	GO:0007094	mitotic spindle assembly checkpoint	11/494	37/23174	1.91703e-10	4.50172e-09	2.36585e-09	17120/12237/11920/69716/20877/18817/67052/70385/11799/268697/12236	11
Biological process	GO:0031577	spindle checkpoint	11/494	37/23174	1.91703e-10	4.50172e-09	2.36585e-09	17120/12237/11920/69716/20877/18817/67052/70385/11799/268697/12236	11
Biological process	GO:0071173	spindle assembly checkpoint	11/494	37/23174	1.91703e-10	4.50172e-09	2.36585e-09	17120/12237/11920/69716/20877/18817/67052/70385/11799/268697/12236	11
Biological process	GO:0071174	mitotic spindle checkpoint	11/494	37/23174	1.91703e-10	4.50172e-09	2.36585e-09	17120/12237/11920/69716/20877/18817/67052/70385/11799/268697/12236	11
Biological process	GO:0071514	genetic imprinting	11/494	37/23174	1.91703e-10	4.50172e-09	2.36585e-09	12189/56637/52463/13436/54427/606496/13435/13018/21849/22702/664799	11
Biological process	GO:0009895	negative regulation of catabolic process	27/494	292/23174	1.96221e-10	4.58523e-09	2.40974e-09	13164/19017/13121/11548/11651/110147/21926/22059/15568/13649/230908/99412/14360/12578/54418/77116/224727/71890/105787/12801/18173/17164/67588/14573/211323/53422/22057	27
Biological process	GO:0090342	regulation of cell aging	12/494	47/23174	2.04713e-10	4.76033e-09	2.50176e-09	11350/22059/21750/69260/56371/12578/20937/67141/12053/19211/16905/22061	12
Biological process	GO:0051402	neuron apoptotic process	27/494	293/23174	2.11922e-10	4.90403e-09	2.57728e-09	19017/22062/26362/21926/56086/16476/22059/12568/211064/12028/56637/12540/18970/13982/22174/15194/433759/606496/14360/20437/11920/17685/11799/19229/14573/67605/22061	27
Biological process	GO:0045144	meiotic sister chromatid segregation	7/494	10/23174	2.17737e-10	4.99015e-09	2.62254e-09	75828/114714/68549/12236/50878/67981/20962	7
Biological process	GO:0051177	meiotic sister chromatid cohesion	7/494	10/23174	2.17737e-10	4.99015e-09	2.62254e-09	75828/114714/68549/12236/50878/67981/20962	7
Biological process	GO:0000212	meiotic spindle organization	8/494	15/23174	2.27482e-10	5.16385e-09	2.71383e-09	54204/22589/99412/12316/67141/105988/20878/17451	8
Biological process	GO:0045835	negative regulation of meiotic nuclear division	8/494	15/23174	2.27482e-10	5.16385e-09	2.71383e-09	19355/22768/50796/69716/67141/67981/378430/17451	8
Biological process	GO:0051653	spindle localization	12/494	48/23174	2.67723e-10	6.04851e-09	3.17875e-09	16211/18472/15194/54418/244329/12316/76123/18817/67052/70385/384619/17451	12
Biological process	GO:0048469	cell maturation	22/494	197/23174	2.705e-10	6.08243e-09	3.19658e-09	13164/56386/18591/56637/56336/18159/18747/230103/56739/12531/16336/381759/69716/67141/13404/12190/268697/20878/102247/18795/19229/54611	22
Biological process	GO:0048545	response to steroid hormone	23/494	216/23174	2.76282e-10	6.18326e-09	3.24957e-09	12189/20592/11548/21803/21926/20779/22195/11835/13982/22196/433759/11614/26395/381022/12317/20586/22259/18708/18119/14573/20181/22061/19217	23
Biological process	GO:0051101	regulation of DNA binding	18/494	129/23174	3.02617e-10	6.74101e-09	3.54269e-09	71175/21803/50505/16476/20610/15525/17701/22218/57261/15901/218914/15904/20586/21849/20466/71890/18005/17702	18
Biological process	GO:0071407	cellular response to organic cyclic compound	35/494	482/23174	3.33438e-10	7.39301e-09	3.88534e-09	12189/20592/21803/11651/12567/110147/18591/21926/26413/12576/20779/16438/22195/13649/11835/13982/22196/71702/433759/606496/15499/12234/11614/381022/12317/20586/12144/19361/18795/17702/54611/18119/14573/22061/18033	35
Biological process	GO:0071897	DNA biosynthetic process	20/494	165/23174	4.09411e-10	9.03546e-09	4.74852e-09	108058/18591/26413/22059/20779/56637/21750/18159/56626/11920/68026/214901/20877/12649/15519/18005/20957/66654/20962/19229	20
Biological process	GO:1901214	regulation of neuron death	30/494	368/23174	4.15975e-10	9.13804e-09	4.80243e-09	19017/22062/26362/21926/11350/56086/16476/22059/12568/211064/12028/56637/16438/12540/233489/12402/13982/22174/15194/433759/606496/14360/15499/11920/17685/22187/11799/19229/14573/67605	30
Biological process	GO:0006303	double-strand break repair via nonhomologous end joining	12/494	50/23174	4.48818e-10	9.81429e-09	5.15783e-09	50505/13870/54125/18970/58230/17350/15499/56626/14375/17535/22594/71890	12
Biological process	GO:0006282	regulation of DNA repair	17/494	117/23174	4.96066e-10	1.07979e-08	5.67478e-09	12189/70238/13649/58230/99375/15499/54418/22594/20937/21849/71890/60530/19362/12144/12649/19361/104271	17
Biological process	GO:0046620	regulation of organ growth	17/494	118/23174	5.68318e-10	1.23144e-08	6.47176e-09	22062/13614/12288/14180/11651/26416/22632/26413/606496/12534/56449/268697/98558/19211/74131/13052/14632	17
Biological process	GO:0042176	regulation of protein catabolic process	30/494	376/23174	6.9561e-10	1.50044e-08	7.88546e-09	170930/13121/11651/21926/20610/30945/56637/26420/19359/13649/22218/99375/18747/56371/606496/14360/12234/12578/54418/224727/71890/22187/18817/15519/20878/12520/67588/19211/19229/211323	30
Biological process	GO:0042770	signal transduction in response to DNA damage	15/494	90/23174	7.30554e-10	1.56872e-08	8.24428e-09	12189/218294/26416/11350/22059/22589/71702/56371/12578/11920/71890/117229/18817/12649/12190	15
Biological process	GO:1902750	negative regulation of cell cycle G2/M phase transition	12/494	52/23174	7.3405e-10	1.56916e-08	8.24659e-09	12189/218294/19357/56371/17535/11920/235559/18817/12144/12534/12649/23834	12
Biological process	GO:1900180	regulation of protein localization to nucleus	17/494	120/23174	7.4279e-10	1.58075e-08	8.30752e-09	21803/11651/26416/26413/20869/20779/56637/230908/15194/14360/12578/21849/20466/12534/13605/18708/16905	17
Biological process	GO:0009416	response to light stimulus	26/494	289/23174	7.72223e-10	1.63608e-08	8.59832e-09	11548/12288/11651/50505/22632/22059/20869/12568/12028/70238/26420/13649/13870/53418/15194/16590/68026/17685/58186/20877/12649/12190/105787/12359/18708/22210	26
Biological process	GO:0000082	G1/S transition of mitotic cell cycle	20/494	171/23174	7.76631e-10	1.63702e-08	8.60327e-09	108058/11651/12567/17863/12576/22059/216166/13649/99375/57261/15904/13205/12578/81702/12580/12566/70891/18795/19211/52004	20
Biological process	GO:0071479	cellular response to ionizing radiation	13/494	64/23174	7.82777e-10	1.63702e-08	8.60327e-09	19355/71175/26416/22059/15499/14375/11920/15270/60530/19362/12144/13605/19361	13
Biological process	GO:0055017	cardiac muscle tissue growth	16/494	105/23174	7.82969e-10	1.63702e-08	8.60327e-09	108058/11548/22062/13614/14180/26416/22632/26413/56637/606496/12534/268697/19211/13052/20181/14632	16
Biological process	GO:0061180	mammary gland epithelium development	14/494	77/23174	8.2003e-10	1.70702e-08	8.97114e-09	21803/26413/20779/12028/17701/11835/13982/75605/12234/12578/12190/22417/17702/20496	14
Biological process	GO:0032768	regulation of monooxygenase activity	11/494	42/23174	8.71725e-10	1.80675e-08	9.49522e-09	11651/21926/56637/21750/13649/13982/12801/19229/12802/14573/18033	11
Biological process	GO:1903320	regulation of protein modification by small protein conjugation or removal	23/494	229/23174	8.80939e-10	1.8101e-08	9.51286e-09	12189/170930/218294/11651/11350/12568/59026/26420/22195/14828/22196/56371/606496/14360/12578/59004/71890/18817/15519/67141/107995/100038882/19211	23
Biological process	GO:2001234	negative regulation of apoptotic signaling pathway	23/494	229/23174	8.80939e-10	1.8101e-08	9.51286e-09	12189/11651/21926/20779/12028/11835/23939/69260/15194/433759/14360/13205/26395/110213/60530/15201/56449/15507/22417/12633/12050/16905/14573	23
Biological process	GO:0007050	cell cycle arrest	18/494	138/23174	9.29557e-10	1.89606e-08	9.9646e-09	12189/218294/22062/21803/12567/12576/22059/20869/434204/18747/12578/12580/244329/26395/11920/12317/17685/229776	18
Biological process	GO:0043392	negative regulation of DNA binding	12/494	53/23174	9.30727e-10	1.89606e-08	9.9646e-09	50505/16476/20610/15525/17701/22218/15901/15904/20466/71890/18005/17702	12
Biological process	GO:0001503	ossification	30/494	381/23174	9.52053e-10	1.93125e-08	1.01495e-08	71175/21803/235320/14180/11651/26416/21926/26413/56637/20683/19242/18159/18747/15901/13363/15904/230103/20937/60530/67141/22417/16591/100038882/17702/16905/19229/12164/22061/14632/22057	30
Biological process	GO:0016445	somatic diversification of immunoglobulins	13/494	65/23174	9.59667e-10	1.93845e-08	1.01874e-08	21803/225160/70238/13870/54125/18970/58230/18861/17350/26909/17685/71890/12053	13
Biological process	GO:0006997	nucleus organization	17/494	122/23174	9.65548e-10	1.9421e-08	1.02065e-08	76407/230908/22218/58230/15463/18472/77053/381759/57749/18817/12649/71241/20957/20962/16905/223697/68231	17
Biological process	GO:0006298	mismatch repair	9/494	25/23174	1.2753e-09	2.55435e-08	1.34242e-08	13870/71567/217716/18861/17687/17350/26909/17685/55993	9
Biological process	GO:0030010	establishment of cell polarity	18/494	141/23174	1.32444e-09	2.64167e-08	1.38831e-08	17755/20869/56637/83964/232174/18472/15194/244329/76123/18817/67052/15519/70385/67588/16905/19229/93742/17451	18
Biological process	GO:0060968	regulation of gene silencing	15/494	94/23174	1.37141e-09	2.72396e-08	1.43156e-08	83557/21803/22059/15568/13649/52463/13982/26395/12566/21849/20466/171506/98558/18033/107970	15
Biological process	GO:0045141	meiotic telomere clustering	7/494	12/23174	1.38473e-09	2.73574e-08	1.43775e-08	17350/77053/11920/74369/26972/22210/668929	7
Biological process	GO:0002312	B cell activation involved in immune response	14/494	80/23174	1.38881e-09	2.73574e-08	1.43775e-08	21803/11350/225160/70238/13870/58230/18861/17350/26909/17685/71890/12053/16848/19229	14
Biological process	GO:0042552	myelination	19/494	159/23174	1.43353e-09	2.8122e-08	1.47793e-08	56386/21803/12558/11651/53897/21926/19401/56336/14712/83964/19242/15904/14360/77116/22239/19211/93742/20181/211323	19
Biological process	GO:0034587	piRNA metabolic process	8/494	18/23174	1.46208e-09	2.84556e-08	1.49546e-08	17864/74691/57749/74068/83456/98558/330890/94244	8
Biological process	GO:0030278	regulation of ossification	23/494	235/23174	1.46248e-09	2.84556e-08	1.49546e-08	71175/21803/235320/26416/21926/26413/56637/19242/18159/18747/15901/15904/20937/67141/22417/16591/100038882/17702/16905/19229/22061/14632/22057	23
Biological process	GO:0070507	regulation of microtubule cytoskeleton organization	21/494	197/23174	1.62488e-09	3.1487e-08	1.65478e-08	17755/11350/12576/56637/18472/66140/66468/244329/219114/228421/16765/76123/74187/18817/72119/12649/21335/18005/105787/20843/52004	21
Biological process	GO:1901861	regulation of muscle tissue development	20/494	179/23174	1.74735e-09	3.37232e-08	1.7723e-08	19017/22062/13614/21803/14180/26416/22632/26413/56637/232174/606496/14605/12534/56449/268697/105787/19211/13052/14632/211323	20
Biological process	GO:0007272	ensheathment of neurons	19/494	162/23174	1.96989e-09	3.77127e-08	1.98196e-08	56386/21803/12558/11651/53897/21926/19401/56336/14712/83964/19242/15904/14360/77116/22239/19211/93742/20181/211323	19
Biological process	GO:0008366	axon ensheathment	19/494	162/23174	1.96989e-09	3.77127e-08	1.98196e-08	56386/21803/12558/11651/53897/21926/19401/56336/14712/83964/19242/15904/14360/77116/22239/19211/93742/20181/211323	19
Biological process	GO:0008630	intrinsic apoptotic signaling pathway in response to DNA damage	16/494	112/23174	2.07538e-09	3.94157e-08	2.07146e-08	12189/22062/21926/22059/12028/18970/17350/59004/11920/224727/17685/12190/98558/12050/18708/22061	16
Biological process	GO:1905269	positive regulation of chromatin organization	16/494	112/23174	2.07538e-09	3.94157e-08	2.07146e-08	71175/12189/21803/17863/22059/52463/69260/13436/11920/20937/21849/20466/71241/268697/12053/16905	16
Biological process	GO:0010528	regulation of transposition	8/494	19/23174	2.47841e-09	4.65141e-08	2.44452e-08	224826/54427/17450/17864/74691/57749/73679/330890	8
Biological process	GO:0010529	negative regulation of transposition	8/494	19/23174	2.47841e-09	4.65141e-08	2.44452e-08	224826/54427/17450/17864/74691/57749/73679/330890	8
Biological process	GO:0072520	seminiferous tubule development	8/494	19/23174	2.47841e-09	4.65141e-08	2.44452e-08	16867/22589/11835/69260/56739/228421/22187/668929	8
Biological process	GO:0019827	stem cell population maintenance	19/494	165/23174	2.68716e-09	5.01666e-08	2.63647e-08	83557/71175/12558/15568/52463/19242/99375/211651/12578/244329/18044/16590/20586/12316/74203/18119/20843/22061/378430	19
Biological process	GO:0006342	chromatin silencing	14/494	84/23174	2.70374e-09	5.01666e-08	2.63647e-08	224826/52463/13436/433759/13435/381022/20937/20586/21849/20466/15201/171506/22210/107970	14
Biological process	GO:0060419	heart growth	16/494	114/23174	2.7046e-09	5.01666e-08	2.63647e-08	108058/11548/22062/13614/14180/26416/22632/26413/56637/606496/12534/268697/19211/13052/20181/14632	16
Biological process	GO:0016447	somatic recombination of immunoglobulin gene segments	12/494	58/23174	2.82464e-09	5.19886e-08	2.73223e-08	21803/225160/70238/13870/18970/58230/18861/17350/26909/17685/71890/12053	12
Biological process	GO:0060443	mammary gland morphogenesis	12/494	58/23174	2.82464e-09	5.19886e-08	2.73223e-08	21803/20779/12028/11835/13982/14595/75605/12234/12578/22417/17702/20496	12
Biological process	GO:0043523	regulation of neuron apoptotic process	24/494	265/23174	3.05855e-09	5.60774e-08	2.94711e-08	19017/22062/26362/21926/56086/16476/22059/12568/211064/12028/56637/12540/13982/22174/15194/433759/606496/14360/11920/17685/11799/19229/14573/67605	24
Biological process	GO:0055024	regulation of cardiac muscle tissue development	15/494	101/23174	3.82953e-09	6.99439e-08	3.67585e-08	22062/13614/21803/14180/26416/22632/26413/56637/606496/12534/268697/19211/13052/14632/211323	15
Biological process	GO:0098727	maintenance of cell number	19/494	169/23174	4.02117e-09	7.31638e-08	3.84507e-08	83557/71175/12558/15568/52463/19242/99375/211651/12578/244329/18044/16590/20586/12316/74203/18119/20843/22061/378430	19
Biological process	GO:0060444	branching involved in mammary gland duct morphogenesis	9/494	28/23174	4.07301e-09	7.35457e-08	3.86514e-08	21803/20779/11835/13982/75605/12234/22417/17702/20496	9
Biological process	GO:0071168	protein localization to chromatin	9/494	28/23174	4.07301e-09	7.35457e-08	3.86514e-08	71175/19357/71567/13982/218914/17685/18817/66634/71988	9
Biological process	GO:0021537	telencephalon development	23/494	248/23174	4.14866e-09	7.46289e-08	3.92207e-08	22062/12558/12568/12028/56637/18222/13649/77579/18472/15194/15904/433759/244329/77053/22594/12316/21335/18795/19211/67269/223697/545428/211323	23
Biological process	GO:0019216	regulation of lipid metabolic process	27/494	336/23174	4.31058e-09	7.725e-08	4.05982e-08	12189/19017/16867/21803/11651/12567/12724/18591/21926/108099/20869/20779/12540/26420/13982/13363/77116/16590/105787/22417/12801/12520/22259/14308/18708/19229/18033	27
Biological process	GO:0018107	peptidyl-threonine phosphorylation	16/494	118/23174	4.51662e-09	8.06393e-08	4.23794e-08	108058/21803/11651/26413/108099/12568/56637/18747/22367/606496/26395/12545/18817/12534/12649/93742	16
Biological process	GO:0000910	cytokinesis	18/494	153/23174	4.99485e-09	8.8845e-08	4.66919e-08	218294/54204/216166/77579/216846/54418/12531/16765/16319/20877/18817/23834/13605/11799/12190/20878/229776/18000	18
Biological process	GO:1900182	positive regulation of protein localization to nucleus	13/494	75/23174	6.09415e-09	1.07996e-07	5.67563e-08	21803/11651/26416/26413/20869/20779/230908/14360/12578/21849/12534/13605/18708	13
Biological process	GO:0031647	regulation of protein stability	24/494	275/23174	6.36119e-09	1.1231e-07	5.90239e-08	109676/103583/22059/20779/56336/17701/230908/22218/15901/15194/12234/12578/20437/224727/12317/18817/15519/66634/20878/12520/19211/18708/16905/22210	24
Biological process	GO:1904666	regulation of ubiquitin protein ligase activity	8/494	21/23174	6.42667e-09	1.13048e-07	5.94115e-08	218294/56371/12578/71890/18817/67141/107995/19211	8
Biological process	GO:0007052	mitotic spindle organization	15/494	105/23174	6.6266e-09	1.16136e-07	6.10345e-08	16211/99412/16765/76123/20877/18817/67052/72119/21335/11799/268697/18005/107995/20878/20843	15
Biological process	GO:0051235	maintenance of location	26/494	320/23174	6.65536e-09	1.16213e-07	6.10748e-08	21402/109676/108058/76407/16867/21803/11651/21926/11350/12568/12028/16438/14828/100986/18472/15194/77053/12316/76123/21335/56746/18795/22259/19229/14421/223697	26
Biological process	GO:0045814	negative regulation of gene expression, epigenetic	14/494	90/23174	6.85178e-09	1.19206e-07	6.26479e-08	224826/52463/13436/433759/13435/381022/20937/20586/21849/20466/15201/171506/22210/107970	14
Biological process	GO:0006338	chromatin remodeling	17/494	139/23174	7.38052e-09	1.27938e-07	6.72369e-08	20592/17863/22589/58230/29871/75605/12578/64707/20586/15201/57749/12649/114642/20962/22061/68231/328440	17
Biological process	GO:0021543	pallium development	18/494	157/23174	7.55419e-09	1.30474e-07	6.85696e-08	22062/12558/12568/12028/56637/13649/18472/15904/433759/244329/77053/22594/12316/21335/18795/19211/223697/545428	18
Biological process	GO:0016202	regulation of striated muscle tissue development	19/494	176/23174	7.91423e-09	1.36199e-07	7.15785e-08	22062/13614/21803/14180/26416/22632/26413/56637/232174/606496/14605/12534/56449/268697/105787/19211/13052/14632/211323	19
Biological process	GO:0008608	attachment of spindle microtubules to kinetochore	9/494	30/23174	8.12297e-09	1.39289e-07	7.32021e-08	17120/12237/73804/72415/67052/13605/12190/268697/18005	9
Biological process	GO:0048806	genitalia development	11/494	51/23174	8.1576e-09	1.39381e-07	7.32507e-08	71175/26362/12028/11835/65247/17289/13982/22174/104271/320558/22061	11
Biological process	GO:0009896	positive regulation of catabolic process	30/494	418/23174	8.23731e-09	1.4024e-07	7.37022e-08	170930/11548/11651/21926/20610/20869/30945/12028/56637/26420/22218/99375/15194/18983/56371/606496/15499/26395/11920/224727/18817/15519/20878/105787/12520/67588/19211/19229/378430/22057	30
Biological process	GO:0048738	cardiac muscle tissue development	23/494	259/23174	9.49249e-09	1.61034e-07	8.46305e-08	108058/11548/22062/13614/21803/14180/26416/22632/26413/56637/12540/19401/77579/606496/19378/12534/268697/19211/16905/13052/20181/14632/211323	23
Biological process	GO:0032196	transposition	8/494	22/23174	9.91123e-09	1.67542e-07	8.80505e-08	224826/54427/17450/17864/74691/57749/73679/330890	8
Biological process	GO:0050730	regulation of peptidyl-tyrosine phosphorylation	23/494	260/23174	1.02107e-08	1.71995e-07	9.03905e-08	21803/18591/21926/11350/22059/20869/20779/54635/17311/12402/13649/18983/433759/14360/15499/16590/76044/56746/12520/14125/19229/14573/211323	23
Biological process	GO:0007163	establishment or maintenance of cell polarity	21/494	219/23174	1.09216e-08	1.82872e-07	9.61069e-08	17755/20869/56637/12540/83964/232174/18472/15194/244329/227743/73804/76123/18817/67052/15519/70385/67588/16905/19229/93742/17451	21
Biological process	GO:0031331	positive regulation of cellular catabolic process	27/494	351/23174	1.09332e-08	1.82872e-07	9.61069e-08	170930/11548/11651/21926/20610/20869/30945/12028/56637/26420/22218/15194/18983/606496/15499/26395/11920/224727/18817/15519/20878/105787/12520/19211/19229/378430/22057	27
Biological process	GO:0031396	regulation of protein ubiquitination	20/494	199/23174	1.10028e-08	1.83393e-07	9.63811e-08	12189/218294/11651/11350/12568/59026/26420/22195/14828/56371/606496/14360/12578/71890/18817/15519/67141/107995/100038882/19211	20
Biological process	GO:0044030	regulation of DNA methylation	9/494	31/23174	1.12311e-08	1.86545e-07	9.80375e-08	12189/110147/56637/52463/54427/606496/13435/17450/171506	9
Biological process	GO:0048634	regulation of muscle organ development	19/494	180/23174	1.14771e-08	1.8997e-07	9.98375e-08	22062/13614/21803/14180/26416/22632/26413/56637/232174/606496/14605/12534/56449/268697/105787/19211/13052/14632/211323	19
Biological process	GO:0018210	peptidyl-threonine modification	16/494	126/23174	1.18415e-08	1.95324e-07	1.02651e-07	108058/21803/11651/26413/108099/12568/56637/18747/22367/606496/26395/12545/18817/12534/12649/93742	16
Biological process	GO:0002204	somatic recombination of immunoglobulin genes involved in immune response	11/494	53/23174	1.25637e-08	2.05106e-07	1.07792e-07	21803/225160/70238/13870/58230/18861/17350/26909/17685/71890/12053	11
Biological process	GO:0002208	somatic diversification of immunoglobulins involved in immune response	11/494	53/23174	1.25637e-08	2.05106e-07	1.07792e-07	21803/225160/70238/13870/58230/18861/17350/26909/17685/71890/12053	11
Biological process	GO:0045190	isotype switching	11/494	53/23174	1.25637e-08	2.05106e-07	1.07792e-07	21803/225160/70238/13870/58230/18861/17350/26909/17685/71890/12053	11
Biological process	GO:0051348	negative regulation of transferase activity	22/494	242/23174	1.30228e-08	2.10931e-07	1.10853e-07	22062/11651/11350/12576/108099/22059/20779/56637/12402/23939/606496/12578/12580/22223/381759/71890/18817/67141/15507/19211/21754/67605	22
Biological process	GO:0000302	response to reactive oxygen species	20/494	201/23174	1.30532e-08	2.10931e-07	1.10853e-07	11651/26362/21926/11350/16476/26413/22059/20779/26420/13649/23939/14360/15499/12578/13605/105787/12359/12633/19229/16649	20
Biological process	GO:0032388	positive regulation of intracellular transport	20/494	201/23174	1.30532e-08	2.10931e-07	1.10853e-07	19042/21803/26416/26413/12568/56637/12540/230908/20218/18747/606496/14360/77116/21849/13605/105787/12801/12520/14125/18708	20
Biological process	GO:0030879	mammary gland development	18/494	163/23174	1.37123e-08	2.20832e-07	1.16057e-07	381489/21803/22282/26413/20779/12028/17701/11835/13982/14595/75605/12234/12578/12190/22417/102247/17702/20496	18
Biological process	GO:0045740	positive regulation of DNA replication	10/494	42/23174	1.41266e-08	2.26738e-07	1.19161e-07	16476/12540/13649/22589/12566/12545/12534/17171/14632/328440	10
Biological process	GO:0031572	G2 DNA damage checkpoint	9/494	32/23174	1.53324e-08	2.44447e-07	1.28467e-07	12189/218294/56371/17535/11920/18817/12144/12534/12649	9
Biological process	GO:0051642	centrosome localization	9/494	32/23174	1.53324e-08	2.44447e-07	1.28467e-07	100986/18472/77053/12316/76123/20878/223697/93742/545428	9
Biological process	GO:0010256	endomembrane system organization	28/494	381/23174	1.57085e-08	2.49608e-07	1.31179e-07	109676/76407/11651/26413/12540/100986/230908/11835/77579/23969/15463/13196/434204/18472/13852/15194/22367/99412/26395/110350/77053/224727/19725/18817/12534/19211/16905/223697	28
Biological process	GO:0001933	negative regulation of protein phosphorylation	29/494	407/23174	1.72038e-08	2.7246e-07	1.43189e-07	19017/22062/21803/11651/11350/16476/12576/108099/12028/15525/56637/12402/230908/23939/18472/12578/12580/22223/381759/18817/268697/15507/19211/21754/17171/93742/67605/22210/56705	29
Biological process	GO:0051293	establishment of spindle localization	10/494	43/23174	1.80591e-08	2.84161e-07	1.49339e-07	16211/18472/15194/54418/244329/76123/18817/67052/70385/17451	10
Biological process	GO:0034599	cellular response to oxidative stress	23/494	268/23174	1.80618e-08	2.84161e-07	1.49339e-07	19017/11651/26362/21926/11350/16476/26413/22059/20779/26420/13649/23939/211651/433759/14360/15499/12578/227743/20466/13605/15507/105787/12633	23
Biological process	GO:0031058	positive regulation of histone modification	14/494	97/23174	1.85019e-08	2.90126e-07	1.52474e-07	71175/12189/21803/17863/22059/52463/69260/13436/11920/20937/71241/268697/12053/16905	14
Biological process	GO:0032204	regulation of telomere maintenance	13/494	82/23174	1.87494e-08	2.93044e-07	1.54007e-07	50505/26413/20779/21750/22589/13870/17535/52864/11920/22594/20877/18005/16905	13
Biological process	GO:0032147	activation of protein kinase activity	22/494	247/23174	1.88928e-08	2.94321e-07	1.54678e-07	22062/30957/18591/21926/11350/20869/20779/54635/13649/18004/26395/16590/108679/72119/13605/18173/12520/14125/19229/17171/211323/17451	22
Biological process	GO:0061842	microtubule organizing center localization	9/494	33/23174	2.06863e-08	3.21211e-07	1.6881e-07	100986/18472/77053/12316/76123/20878/223697/93742/545428	9
Biological process	GO:0090316	positive regulation of intracellular protein transport	16/494	131/23174	2.08249e-08	3.22313e-07	1.69389e-07	19042/21803/26416/26413/12568/56637/12540/230908/18747/606496/14360/21849/13605/105787/12520/18708	16
Biological process	GO:0048146	positive regulation of fibroblast proliferation	12/494	69/23174	2.25771e-08	3.48301e-07	1.83047e-07	21803/12567/18591/16476/54635/13649/13982/218914/23834/12428/268697/19417	12
Biological process	GO:2001242	regulation of intrinsic apoptotic signaling pathway	18/494	169/23174	2.42216e-08	3.72465e-07	1.95746e-07	22062/22059/20779/12028/17701/23939/433759/13205/20437/59004/26395/110213/60530/22187/15201/56449/15507/12050	18
Biological process	GO:0062013	positive regulation of small molecule metabolic process	17/494	151/23174	2.59432e-08	3.97656e-07	2.08986e-07	19017/16867/11548/11651/18591/21926/20869/20779/26420/26395/12534/268697/105787/22417/22259/17171/18033	17
Biological process	GO:0001890	placenta development	18/494	170/23174	2.65642e-08	4.05871e-07	2.13302e-07	11651/26416/18591/26413/12576/211064/20683/13649/13039/19242/54427/15499/26395/21849/70248/73679/18119/20181	18
Biological process	GO:0009636	response to toxic substance	26/494	343/23174	2.76252e-08	4.20733e-07	2.21113e-07	12799/11548/26362/18591/21926/11350/26413/22059/20779/12028/19401/23939/218914/433759/14360/15499/12578/12534/13605/105787/12359/12801/19211/19229/16649/18033	26
Biological process	GO:0010035	response to inorganic substance	32/494	493/23174	2.8546e-08	4.33372e-07	2.27755e-07	11651/12567/26362/21926/11350/16476/26413/12576/22059/20779/56637/26420/66722/13649/22589/22218/23939/15194/606496/233908/14360/15499/12578/12144/13605/19361/105787/12359/12633/18795/19229/16649	32
Biological process	GO:0060135	maternal process involved in female pregnancy	10/494	45/23174	2.89222e-08	4.36303e-07	2.29296e-07	11651/26413/13039/11835/19242/13982/70248/22417/18119/20181	10
Biological process	GO:0061647	histone H3-K9 modification	10/494	45/23174	2.89222e-08	4.36303e-07	2.29296e-07	12189/110147/17863/22589/13436/20937/64707/12649/71241/16905	10
Biological process	GO:0051341	regulation of oxidoreductase activity	13/494	85/23174	2.92975e-08	4.39185e-07	2.30811e-07	13614/11651/21926/11350/56637/21750/13649/13982/12801/19229/12802/14573/18033	13
Biological process	GO:1901863	positive regulation of muscle tissue development	13/494	85/23174	2.92975e-08	4.39185e-07	2.30811e-07	19017/13614/21803/14180/26416/26413/56637/232174/12534/268697/105787/14632/211323	13
Biological process	GO:0032886	regulation of microtubule-based process	21/494	232/23174	3.00657e-08	4.47722e-07	2.35297e-07	17755/11350/12576/56637/18472/66140/66468/244329/219114/228421/16765/76123/74187/18817/72119/12649/21335/18005/105787/20843/52004	21
Biological process	GO:0042063	gliogenesis	25/494	321/23174	3.01487e-08	4.47722e-07	2.35297e-07	83557/56386/12799/22062/21803/12558/11651/18591/21926/11350/26413/12568/56336/13649/19242/18472/15904/433759/26395/77053/20586/19211/223697/93742/211323	25
Biological process	GO:0045862	positive regulation of proteolysis	25/494	321/23174	3.01487e-08	4.47722e-07	2.35297e-07	170930/11651/103583/26416/21926/20610/20779/30945/12028/56637/233489/26420/22218/606496/14360/15499/13205/12234/12578/224727/18817/20878/19211/19229/18119	25
Biological process	GO:0010165	response to X-ray	8/494	25/23174	3.16881e-08	4.69122e-07	2.46544e-07	71175/22059/13870/14375/11920/17685/12144/12190	8
Biological process	GO:0042692	muscle cell differentiation	28/494	394/23174	3.21954e-08	4.75156e-07	2.49715e-07	109676/108058/11548/13614/21803/12558/14180/11651/26416/18591/22632/56637/19401/17701/77579/232174/606496/81702/22223/16590/20586/22417/12520/12633/16905/13052/20181/211323	28
Biological process	GO:0050731	positive regulation of peptidyl-tyrosine phosphorylation	19/494	192/23174	3.29423e-08	4.84679e-07	2.5472e-07	21803/18591/21926/11350/22059/20869/20779/17311/433759/14360/15499/16590/76044/56746/12520/14125/19229/14573/211323	19
Biological process	GO:2000278	regulation of DNA biosynthetic process	15/494	118/23174	3.34262e-08	4.90286e-07	2.57666e-07	108058/18591/26413/22059/20779/56637/21750/18159/11920/214901/20877/12649/15519/18005/19229	15
Biological process	GO:0060537	muscle tissue development	31/494	471/23174	3.44366e-08	5.03557e-07	2.64641e-07	19017/108058/11548/22062/13614/21803/14180/26416/22632/26413/12568/56637/12540/19401/77579/232174/606496/14605/19378/12534/56449/268697/105787/12633/19211/16905/13052/20181/22061/14632/211323	31
Biological process	GO:0002285	lymphocyte activation involved in immune response	19/494	193/23174	3.58296e-08	5.22324e-07	2.74503e-07	21803/17863/11350/225160/22059/70238/19401/13870/58230/18861/17350/26909/17685/71890/12053/18173/12520/16848/19229	19
Biological process	GO:0051567	histone H3-K9 methylation	9/494	35/23174	3.64636e-08	5.29945e-07	2.78509e-07	12189/110147/17863/22589/13436/20937/64707/71241/16905	9
Biological process	GO:0010001	glial cell differentiation	21/494	236/23174	4.04492e-08	5.86083e-07	3.08012e-07	83557/56386/12799/22062/21803/12558/11651/18591/11350/26413/12568/56336/13649/19242/15904/433759/26395/20586/19211/93742/211323	21
Biological process	GO:0051570	regulation of histone H3-K9 methylation	8/494	26/23174	4.49212e-08	6.46946e-07	3.39998e-07	12189/110147/17863/22589/13436/20937/71241/16905	8
Biological process	GO:1904353	regulation of telomere capping	8/494	26/23174	4.49212e-08	6.46946e-07	3.39998e-07	50505/26413/21750/13870/11920/22594/20877/18005	8
Biological process	GO:0030261	chromosome condensation	10/494	47/23174	4.51858e-08	6.48798e-07	3.40971e-07	71175/218914/244329/68298/230936/12534/171506/76044/268697/107970	10
Biological process	GO:0062012	regulation of small molecule metabolic process	26/494	353/23174	4.92605e-08	7.0518e-07	3.70602e-07	12189/19017/16867/11548/21803/11651/12724/18591/21926/108099/80915/22059/20869/20779/26420/26395/16590/12534/268697/105787/22417/12801/22259/19229/17171/18033	26
Biological process	GO:0009755	hormone-mediated signaling pathway	17/494	158/23174	5.1025e-08	7.28252e-07	3.82728e-07	12189/20592/381489/16867/20779/19401/11835/13982/22196/433759/11614/381022/12317/20586/14308/18119/22061	17
Biological process	GO:0045910	negative regulation of DNA recombination	10/494	48/23174	5.59979e-08	7.9447e-07	4.17528e-07	225160/21750/17350/17685/71890/58186/12144/171506/12053/107970	10
Biological process	GO:0051438	regulation of ubiquitin-protein transferase activity	10/494	48/23174	5.59979e-08	7.9447e-07	4.17528e-07	218294/11350/22195/56371/12578/71890/18817/67141/107995/19211	10
Biological process	GO:0050679	positive regulation of epithelial cell proliferation	19/494	199/23174	5.86319e-08	8.29372e-07	4.3587e-07	21803/14180/11651/18591/16476/16438/20683/12540/13649/11835/19242/13982/14595/15901/75605/12633/18119/13052/22061	19
Biological process	GO:0042698	ovulation cycle	11/494	61/23174	5.90977e-08	8.33488e-07	4.38034e-07	16867/26362/20779/13649/19242/13982/22174/14566/11576/229357/14308	11
Biological process	GO:0016233	telomere capping	9/494	37/23174	6.18573e-08	8.69834e-07	4.57135e-07	50505/26413/21750/13870/17535/11920/22594/20877/18005	9
Biological process	GO:0048145	regulation of fibroblast proliferation	14/494	107/23174	6.62526e-08	9.28901e-07	4.88177e-07	21803/12567/18591/16476/22059/12028/54635/13649/13982/218914/23834/12428/268697/19417	14
Biological process	GO:0031047	gene silencing by RNA	17/494	162/23174	7.38429e-08	1.03228e-06	5.4251e-07	83557/21803/22059/15568/13649/13982/18983/26395/74691/57749/74068/83456/98558/330890/76850/18033/94244	17
Biological process	GO:1901215	negative regulation of neuron death	21/494	245/23174	7.69994e-08	1.07326e-06	5.64046e-07	19017/22062/26362/56086/16476/12568/211064/12028/56637/16438/12402/13982/22174/15194/433759/14360/15499/17685/11799/19229/14573	21
Biological process	GO:0040019	positive regulation of embryonic development	9/494	38/23174	7.9534e-08	1.10536e-06	5.80915e-07	18591/22026/56336/14828/11835/18472/22417/18795/14573	9
Biological process	GO:0055021	regulation of cardiac muscle tissue growth	12/494	77/23174	8.06596e-08	1.11775e-06	5.87423e-07	22062/13614/14180/26416/22632/26413/606496/12534/268697/19211/13052/14632	12
Biological process	GO:0048144	fibroblast proliferation	14/494	109/23174	8.40095e-08	1.16079e-06	6.10046e-07	21803/12567/18591/16476/22059/12028/54635/13649/13982/218914/23834/12428/268697/19417	14
Biological process	GO:0051984	positive regulation of chromosome segregation	8/494	28/23174	8.60799e-08	1.18596e-06	6.23274e-07	71175/19357/226026/67241/58186/23834/68549/268697	8
Biological process	GO:0071229	cellular response to acid chemical	22/494	271/23174	9.89426e-08	1.35923e-06	7.14332e-07	11651/12567/18591/21926/54635/224826/19401/13649/232174/13436/14360/15499/13435/11920/19378/73614/20899/12877/105787/18795/19229/19217	22
Biological process	GO:0046824	positive regulation of nucleocytoplasmic transport	11/494	64/23174	9.92262e-08	1.35923e-06	7.14332e-07	19042/21803/26416/26413/56637/230908/20218/18747/21849/13605/18708	11
Biological process	GO:0017145	stem cell division	10/494	51/23174	1.0331e-07	1.41111e-06	7.41601e-07	235320/17863/18222/18472/69260/12578/16590/12316/20899/52004	10
Biological process	GO:0033143	regulation of intracellular steroid hormone receptor signaling pathway	12/494	79/23174	1.08146e-07	1.46875e-06	7.71889e-07	12189/20592/20779/11835/22196/433759/11614/381022/12317/20586/18119/22061	12
Biological process	GO:0051781	positive regulation of cell division	12/494	79/23174	1.08146e-07	1.46875e-06	7.71889e-07	218294/21803/14180/18591/54635/19242/12531/20877/23834/13605/12359/229776	12
Biological process	GO:0097191	extrinsic apoptotic signaling pathway	20/494	229/23174	1.15658e-07	1.56631e-06	8.23161e-07	12189/21803/21926/20779/12028/56637/17311/11835/23939/15194/606496/14360/13205/12633/67588/12050/19211/18708/16905/14573	20
Biological process	GO:0072395	signal transduction involved in cell cycle checkpoint	8/494	29/23174	1.16665e-07	1.56659e-06	8.23312e-07	12189/218294/22059/71702/56371/11920/18817/12649	8
Biological process	GO:0072401	signal transduction involved in DNA integrity checkpoint	8/494	29/23174	1.16665e-07	1.56659e-06	8.23312e-07	12189/218294/22059/71702/56371/11920/18817/12649	8
Biological process	GO:0072422	signal transduction involved in DNA damage checkpoint	8/494	29/23174	1.16665e-07	1.56659e-06	8.23312e-07	12189/218294/22059/71702/56371/11920/18817/12649	8
Biological process	GO:0002381	immunoglobulin production involved in immunoglobulin mediated immune response	11/494	65/23174	1.17169e-07	1.56894e-06	8.24547e-07	21803/225160/70238/13870/58230/18861/17350/26909/17685/71890/12053	11
Biological process	GO:0045732	positive regulation of protein catabolic process	19/494	208/23174	1.18487e-07	1.57773e-06	8.29167e-07	170930/11651/21926/20610/30945/56637/26420/22218/99375/56371/606496/224727/18817/15519/20878/12520/67588/19211/19229	19
Biological process	GO:2000027	regulation of animal organ morphogenesis	19/494	208/23174	1.18487e-07	1.57773e-06	8.29167e-07	13614/21803/21926/11350/12028/16438/12540/18222/17701/11835/19242/13982/14595/12578/22417/12633/14573/20181/14632	19
Biological process	GO:0045995	regulation of embryonic development	15/494	130/23174	1.23658e-07	1.64199e-06	8.62938e-07	71175/18591/22026/56336/14828/11835/23939/18472/18747/224727/22417/18795/16848/18119/14573	15
Biological process	GO:0051090	regulation of DNA-binding transcription factor activity	27/494	395/23174	1.25269e-07	1.65877e-06	8.71756e-07	19017/13614/21803/11651/21926/26413/23957/11835/22218/13982/22196/15901/211651/11614/12578/59004/14087/16590/20586/71890/21335/12359/12633/67588/19211/17702/18119	27
Biological process	GO:0007623	circadian rhythm	19/494	209/23174	1.27805e-07	1.68691e-06	8.86541e-07	19017/103583/22059/56637/59026/26420/23957/230908/15901/75605/15904/433759/12234/20937/64707/20466/12534/105787/19211	19
Biological process	GO:0060603	mammary gland duct morphogenesis	9/494	40/23174	1.28455e-07	1.68691e-06	8.86541e-07	21803/20779/11835/13982/75605/12234/22417/17702/20496	9
Biological process	GO:2000772	regulation of cellular senescence	9/494	40/23174	1.28455e-07	1.68691e-06	8.86541e-07	11350/22059/21750/69260/12578/20937/67141/12053/22061	9
Biological process	GO:0014706	striated muscle tissue development	29/494	448/23174	1.36467e-07	1.78719e-06	9.39246e-07	108058/11548/22062/13614/21803/14180/26416/22632/26413/12568/56637/12540/19401/77579/232174/606496/14605/19378/12534/56449/268697/105787/12633/19211/16905/13052/20181/14632/211323	29
Biological process	GO:0072425	signal transduction involved in G2 DNA damage checkpoint	6/494	13/23174	1.3759e-07	1.79697e-06	9.44384e-07	12189/218294/56371/11920/18817/12649	6
Biological process	GO:0072594	establishment of protein localization to organelle	26/494	374/23174	1.54494e-07	2.01222e-06	1.05751e-06	71175/16867/21803/16646/14180/11651/26416/26413/22059/12028/15525/230673/14828/230908/16211/606496/12578/16648/21849/15519/13605/12190/105787/18708/16905/16649	26
Biological process	GO:0006606	protein import into nucleus	16/494	151/23174	1.56035e-07	2.02675e-06	1.06515e-06	21803/16646/14180/11651/26416/26413/22059/230673/230908/16211/16648/21849/13605/18708/16905/16649	16
Biological process	GO:0016055	Wnt signaling pathway	28/494	425/23174	1.56782e-07	2.02936e-06	1.06652e-06	19042/12558/14180/103583/26362/26416/11350/20869/20779/56637/13649/17289/22174/433759/606496/13205/12234/59004/20586/12316/71890/105787/22417/18647/19211/22210/18033/14632	28
Biological process	GO:0042326	negative regulation of phosphorylation	29/494	451/23174	1.57087e-07	2.02936e-06	1.06652e-06	19017/22062/21803/11651/11350/16476/12576/108099/12028/15525/56637/12402/230908/23939/18472/12578/12580/22223/381759/18817/268697/15507/19211/21754/17171/93742/67605/22210/56705	29
Biological process	GO:0010972	negative regulation of G2/M transition of mitotic cell cycle	9/494	41/23174	1.61498e-07	2.0807e-06	1.0935e-06	12189/19357/17535/11920/235559/12144/12534/12649/23834	9
Biological process	GO:0034248	regulation of cellular amide metabolic process	26/494	375/23174	1.62766e-07	2.09138e-06	1.09911e-06	83557/13164/11651/12567/21926/26413/211064/15568/233489/19401/20218/230861/18983/606496/13205/12317/74203/57749/12877/330890/19229/20181/76850/378430/53422/22057	26
Biological process	GO:0071902	positive regulation of protein serine/threonine kinase activity	22/494	279/23174	1.64528e-07	2.10834e-06	1.10802e-06	22062/13614/30957/21803/11651/18591/21926/12576/20869/20779/54635/17311/13649/13205/26395/16590/70891/23834/12520/14125/19229/17451	22
Biological process	GO:1903364	positive regulation of cellular protein catabolic process	15/494	133/23174	1.67503e-07	2.14072e-06	1.12504e-06	170930/11651/20610/30945/56637/26420/22218/606496/224727/18817/15519/20878/12520/19211/19229	15
Biological process	GO:0006349	regulation of gene expression by genetic imprinting	7/494	21/23174	1.7209e-07	2.19345e-06	1.15275e-06	12189/56637/13436/606496/13435/13018/664799	7
Biological process	GO:0198738	cell-cell signaling by wnt	28/494	427/23174	1.72647e-07	2.19469e-06	1.15341e-06	19042/12558/14180/103583/26362/26416/11350/20869/20779/56637/13649/17289/22174/433759/606496/13205/12234/59004/20586/12316/71890/105787/22417/18647/19211/22210/18033/14632	28
Biological process	GO:0055025	positive regulation of cardiac muscle tissue development	10/494	54/23174	1.82725e-07	2.31662e-06	1.21748e-06	13614/21803/14180/26416/26413/56637/12534/268697/14632/211323	10
Biological process	GO:1903322	positive regulation of protein modification by small protein conjugation or removal	15/494	134/23174	1.84981e-07	2.33067e-06	1.22487e-06	12189/170930/218294/59026/26420/22195/14828/22196/56371/606496/12578/59004/18817/107995/19211	15
Biological process	GO:1904375	regulation of protein localization to cell periphery	15/494	134/23174	1.84981e-07	2.33067e-06	1.22487e-06	108058/21803/11651/21926/12568/56637/18222/233489/13649/11835/26395/76123/18817/18708/56508	15
Biological process	GO:0071824	protein-DNA complex subunit organization	19/494	214/23174	1.853e-07	2.33067e-06	1.22487e-06	56086/22059/22589/21374/58230/13982/13018/213389/20586/15201/57749/171506/114642/13404/19361/20962/68231/107970/240697	19
Biological process	GO:0001558	regulation of cell growth	28/494	429/23174	1.89994e-07	2.38342e-06	1.25259e-06	13614/17755/21803/11651/11350/22632/12576/22059/20869/12568/56637/233489/17701/13649/18472/606496/13205/12578/77980/12580/20586/71890/30939/14566/12053/12520/19229/211323	28
Biological process	GO:0006417	regulation of translation	24/494	329/23174	1.93211e-07	2.41742e-06	1.27046e-06	83557/13164/11651/12567/21926/26413/211064/15568/19401/20218/230861/18983/13205/12317/74203/57749/12877/330890/19229/20181/76850/378430/53422/22057	24
Biological process	GO:0010498	proteasomal protein catabolic process	29/494	456/23174	1.98006e-07	2.47093e-06	1.29858e-06	21402/170930/11651/103583/26931/30945/11907/56637/224826/26420/19359/14828/22218/22196/68999/99375/18747/56371/606496/12234/20437/224727/22187/18817/107995/20878/67588/22210/16912	29
Biological process	GO:1903362	regulation of cellular protein catabolic process	20/494	237/23174	2.02359e-07	2.51865e-06	1.32366e-06	170930/11651/20610/30945/56637/26420/19359/22218/18747/606496/12234/12578/224727/22187/18817/15519/20878/12520/19211/19229	20
Biological process	GO:0050999	regulation of nitric-oxide synthase activity	8/494	31/23174	2.06535e-07	2.56394e-06	1.34746e-06	11651/56637/21750/13649/13982/12801/19229/12802	8
Biological process	GO:0045844	positive regulation of striated muscle tissue development	12/494	84/23174	2.16694e-07	2.66596e-06	1.40107e-06	13614/21803/14180/26416/26413/56637/232174/12534/268697/105787/14632/211323	12
Biological process	GO:0048636	positive regulation of muscle organ development	12/494	84/23174	2.16694e-07	2.66596e-06	1.40107e-06	13614/21803/14180/26416/26413/56637/232174/12534/268697/105787/14632/211323	12
Biological process	GO:0060420	regulation of heart growth	12/494	84/23174	2.16694e-07	2.66596e-06	1.40107e-06	22062/13614/14180/26416/22632/26413/606496/12534/268697/19211/13052/14632	12
Biological process	GO:0045666	positive regulation of neuron differentiation	29/494	458/23174	2.1699e-07	2.66596e-06	1.40107e-06	83557/17755/30957/20869/56637/16438/18222/233489/216166/19401/14828/19242/50772/23969/18472/13436/99412/14360/26395/74187/13605/12877/15507/12053/12801/12633/19211/19229/211323	29
Biological process	GO:0051170	import into nucleus	16/494	155/23174	2.24162e-07	2.74699e-06	1.44366e-06	21803/16646/14180/11651/26416/26413/22059/230673/230908/16211/16648/21849/13605/18708/16905/16649	16
Biological process	GO:0016446	somatic hypermutation of immunoglobulin genes	6/494	14/23174	2.36447e-07	2.8901e-06	1.51887e-06	54125/18970/18861/17350/26909/17685	6
Biological process	GO:2001022	positive regulation of response to DNA damage stimulus	13/494	101/23174	2.37415e-07	2.89452e-06	1.5212e-06	12189/22062/70238/13649/58230/12578/54418/59004/11920/22594/21849/71890/12144	13
Biological process	GO:0071383	cellular response to steroid hormone stimulus	16/494	156/23174	2.44955e-07	2.97882e-06	1.5655e-06	12189/20592/21803/20779/22195/11835/13982/22196/433759/11614/381022/12317/20586/18119/14573/22061	16
Biological process	GO:0071459	protein localization to chromosome, centromeric region	7/494	22/23174	2.47773e-07	3.00543e-06	1.57948e-06	12237/13018/20877/67052/12534/70385/12236	7
Biological process	GO:0060964	regulation of gene silencing by miRNA	9/494	43/23174	2.50298e-07	3.02836e-06	1.59153e-06	83557/21803/22059/15568/13649/13982/26395/98558/18033	9
Biological process	GO:0031109	microtubule polymerization or depolymerization	14/494	119/23174	2.55153e-07	3.07928e-06	1.61829e-06	17755/11350/12576/66140/99412/66468/17997/219114/74237/228421/16765/73804/74187/67141	14
Biological process	GO:0031641	regulation of myelination	10/494	56/23174	2.6171e-07	3.15043e-06	1.65569e-06	12558/11651/21926/19401/19242/77116/19211/93742/20181/211323	10
Biological process	GO:0016571	histone methylation	15/494	138/23174	2.72617e-07	3.27347e-06	1.72035e-06	12189/110147/17863/22589/52463/232811/13436/13018/381022/20937/64707/213389/71241/16905/664799	15
Biological process	GO:0030522	intracellular receptor signaling pathway	18/494	199/23174	2.94964e-07	3.5329e-06	1.85669e-06	12189/20592/20779/19401/11835/13982/22196/232174/433759/11614/81702/381022/12317/20586/19378/18119/20181/22061	18
Biological process	GO:0046622	positive regulation of organ growth	10/494	57/23174	3.11401e-07	3.71112e-06	1.95035e-06	13614/14180/11651/26416/26413/12534/56449/268697/74131/14632	10
Biological process	GO:0051310	metaphase plate congression	10/494	57/23174	3.11401e-07	3.71112e-06	1.95035e-06	54204/17120/16211/17350/228421/73804/67052/70385/12190/268697	10
Biological process	GO:0030518	intracellular steroid hormone receptor signaling pathway	13/494	104/23174	3.35815e-07	3.9921e-06	2.09802e-06	12189/20592/20779/11835/13982/22196/433759/11614/381022/12317/20586/18119/22061	13
Biological process	GO:0002366	leukocyte activation involved in immune response	21/494	268/23174	3.4862e-07	4.12124e-06	2.16589e-06	21803/17863/11350/225160/22059/70238/19401/13870/58230/18861/17350/16590/26909/17685/71890/12053/18173/12520/14125/16848/19229	21
Biological process	GO:0006346	methylation-dependent chromatin silencing	7/494	23/23174	3.49649e-07	4.12124e-06	2.16589e-06	52463/13436/433759/13435/20586/21849/15201	7
Biological process	GO:0071276	cellular response to cadmium ion	7/494	23/23174	3.49649e-07	4.12124e-06	2.16589e-06	11651/16476/26413/26420/13649/22218/15499	7
Biological process	GO:0040001	establishment of mitotic spindle localization	8/494	33/23174	3.50137e-07	4.12124e-06	2.16589e-06	16211/18472/15194/244329/76123/18817/67052/70385	8
Biological process	GO:0018108	peptidyl-tyrosine phosphorylation	23/494	316/23174	3.61393e-07	4.24325e-06	2.23001e-06	21803/18591/21926/11350/22059/20869/20779/54635/17311/12402/13649/18983/433759/14360/15499/16590/76044/56746/12520/14125/19229/14573/211323	23
Biological process	GO:0030217	T cell differentiation	21/494	269/23174	3.70786e-07	4.34284e-06	2.28235e-06	21803/235320/17863/11350/22059/20869/19401/56218/232174/11634/211651/12578/14087/16590/12144/15519/12053/22417/16848/22324/74131	21
Biological process	GO:0002566	somatic diversification of immune receptors via somatic mutation	6/494	15/23174	3.86983e-07	4.52144e-06	2.37621e-06	54125/18970/18861/17350/26909/17685	6
Biological process	GO:0031060	regulation of histone methylation	11/494	73/23174	3.99565e-07	4.64568e-06	2.4415e-06	12189/110147/17863/22589/52463/13436/13018/20937/71241/16905/664799	11
Biological process	GO:2000573	positive regulation of DNA biosynthetic process	11/494	73/23174	3.99565e-07	4.64568e-06	2.4415e-06	108058/18591/26413/20779/56637/11920/214901/20877/15519/18005/19229	11
Biological process	GO:0018212	peptidyl-tyrosine modification	23/494	319/23174	4.26746e-07	4.94963e-06	2.60124e-06	21803/18591/21926/11350/22059/20869/20779/54635/17311/12402/13649/18983/433759/14360/15499/16590/76044/56746/12520/14125/19229/14573/211323	23
Biological process	GO:0002263	cell activation involved in immune response	21/494	272/23174	4.4527e-07	5.15195e-06	2.70757e-06	21803/17863/11350/225160/22059/70238/19401/13870/58230/18861/17350/16590/26909/17685/71890/12053/18173/12520/14125/16848/19229	21
Biological process	GO:0048660	regulation of smooth muscle cell proliferation	16/494	163/23174	4.46837e-07	5.15756e-06	2.71052e-06	19017/108058/13614/14180/11651/18591/21926/16476/12576/22059/56637/13649/13982/14375/19211/18708	16
Biological process	GO:0060147	regulation of posttranscriptional gene silencing	9/494	46/23174	4.62028e-07	5.3072e-06	2.78916e-06	83557/21803/22059/15568/13649/13982/26395/98558/18033	9
Biological process	GO:0060966	regulation of gene silencing by RNA	9/494	46/23174	4.62028e-07	5.3072e-06	2.78916e-06	83557/21803/22059/15568/13649/13982/26395/98558/18033	9
Biological process	GO:0001654	eye development	26/494	397/23174	4.88575e-07	5.59865e-06	2.94233e-06	71175/21803/12288/14180/12724/18591/16476/22632/12576/12028/20683/19401/13649/16886/19242/17289/19763/77579/56371/433759/20586/50933/19378/12961/67269/20181	26
Biological process	GO:1903050	regulation of proteolysis involved in cellular protein catabolic process	18/494	206/23174	4.92685e-07	5.63221e-06	2.95997e-06	170930/11651/20610/30945/56637/26420/19359/22218/18747/606496/12234/12578/224727/22187/18817/20878/19211/19229	18
Biological process	GO:0007517	muscle organ development	27/494	424/23174	5.10561e-07	5.8226e-06	3.06002e-06	22062/13614/21803/14180/17932/26416/22632/26413/12568/56637/386655/17701/232174/606496/14605/12534/56449/83456/268697/105787/12633/19211/16905/13052/20181/14632/211323	27
Biological process	GO:0021987	cerebral cortex development	13/494	108/23174	5.2322e-07	5.95272e-06	3.12841e-06	12558/12568/12028/56637/13649/18472/244329/77053/12316/21335/18795/223697/545428	13
Biological process	GO:2000060	positive regulation of ubiquitin-dependent protein catabolic process	12/494	91/23174	5.28724e-07	6.00102e-06	3.15379e-06	170930/11651/20610/30945/56637/26420/22218/606496/18817/20878/19211/19229	12
Biological process	GO:0043010	camera-type eye development	24/494	348/23174	5.36655e-07	6.07657e-06	3.1935e-06	21803/12288/12724/18591/16476/22632/12576/12028/20683/19401/13649/16886/19242/17289/19763/77579/56371/433759/20586/50933/19378/12961/67269/20181	24
Biological process	GO:1905475	regulation of protein localization to membrane	17/494	186/23174	5.42999e-07	6.13383e-06	3.22359e-06	108058/21803/12558/11651/21926/12568/56637/18222/233489/13649/11835/19242/14360/26395/12520/18708/56508	17
Biological process	GO:0150063	visual system development	26/494	400/23174	5.6372e-07	6.35284e-06	3.33869e-06	71175/21803/12288/14180/12724/18591/16476/22632/12576/12028/20683/19401/13649/16886/19242/17289/19763/77579/56371/433759/20586/50933/19378/12961/67269/20181	26
Biological process	GO:0016572	histone phosphorylation	8/494	35/23174	5.71722e-07	6.42782e-06	3.3781e-06	12568/22367/12566/11920/20877/12428/268697/22210	8
Biological process	GO:0034968	histone lysine methylation	13/494	109/23174	5.82696e-07	6.53579e-06	3.43484e-06	12189/110147/17863/22589/232811/13436/381022/20937/64707/213389/71241/16905/664799	13
Biological process	GO:0030099	myeloid cell differentiation	26/494	401/23174	5.91048e-07	6.61391e-06	3.4759e-06	21803/235320/26416/21926/17863/16476/20779/56637/17311/242687/20683/19401/99375/18472/16590/67773/20586/76044/12053/12520/100038882/67588/18795/14308/18708/19229	26
Biological process	GO:0061640	cytoskeleton-dependent cytokinesis	12/494	92/23174	5.96435e-07	6.65856e-06	3.49936e-06	54204/77579/216846/54418/16765/16319/20877/18817/13605/11799/12190/18000	12
Biological process	GO:0017038	protein import	18/494	209/23174	6.09545e-07	6.78903e-06	3.56792e-06	21803/16646/14180/11651/26416/26413/22059/15525/230673/230908/16211/16648/21849/15519/13605/18708/16905/16649	18
Biological process	GO:2000058	regulation of ubiquitin-dependent protein catabolic process	15/494	147/23174	6.20577e-07	6.89578e-06	3.62403e-06	170930/11651/20610/30945/56637/26420/19359/22218/606496/12578/224727/18817/20878/19211/19229	15
Biological process	GO:0048880	sensory system development	26/494	403/23174	6.49409e-07	7.19938e-06	3.78358e-06	71175/21803/12288/14180/12724/18591/16476/22632/12576/12028/20683/19401/13649/16886/19242/17289/19763/77579/56371/433759/20586/50933/19378/12961/67269/20181	26
Biological process	GO:0045737	positive regulation of cyclin-dependent protein serine/threonine kinase activity	7/494	25/23174	6.60706e-07	7.2907e-06	3.83158e-06	11651/18591/12576/20779/13649/70891/23834	7
Biological process	GO:0090344	negative regulation of cell aging	7/494	25/23174	6.60706e-07	7.2907e-06	3.83158e-06	11350/21750/56371/67141/12053/19211/22061	7
Biological process	GO:0048659	smooth muscle cell proliferation	16/494	168/23174	6.7284e-07	7.40745e-06	3.89294e-06	19017/108058/13614/14180/11651/18591/21926/16476/12576/22059/56637/13649/13982/14375/19211/18708	16
Biological process	GO:0014855	striated muscle cell proliferation	11/494	77/23174	6.94887e-07	7.63255e-06	4.01123e-06	22062/14180/26416/26413/12534/268697/12633/19211/13052/20181/14632	11
Biological process	GO:0060038	cardiac muscle cell proliferation	10/494	62/23174	7.04893e-07	7.72465e-06	4.05964e-06	22062/14180/26416/26413/12534/268697/19211/13052/20181/14632	10
Biological process	GO:0043900	regulation of multi-organism process	26/494	405/23174	7.13045e-07	7.79607e-06	4.09717e-06	21926/16476/20683/230908/11835/18159/14595/18983/433759/13205/230103/81702/17535/12317/20586/21849/20466/381759/20878/12801/100038882/18795/229357/54611/18119/94244	26
Biological process	GO:0043401	steroid hormone mediated signaling pathway	13/494	111/23174	7.20058e-07	7.85184e-06	4.12648e-06	12189/20592/20779/11835/13982/22196/433759/11614/381022/12317/20586/18119/22061	13
Biological process	GO:0051294	establishment of spindle orientation	8/494	36/23174	7.2144e-07	7.85184e-06	4.12648e-06	18472/15194/244329/76123/18817/67052/70385/17451	8
Biological process	GO:0001101	response to acid chemical	24/494	354/23174	7.28968e-07	7.9157e-06	4.16004e-06	11651/12567/18591/21926/54635/224826/19401/13649/232174/13436/14360/15499/13435/110213/11920/19378/73614/20899/12877/105787/18795/19229/20181/19217	24
Biological process	GO:0044706	multi-multicellular organism process	17/494	190/23174	7.32926e-07	7.94059e-06	4.17312e-06	381489/11651/26413/20683/13039/11835/19242/13982/13852/14595/15499/12317/21849/70248/22417/18119/20181	17
Biological process	GO:1903706	regulation of hemopoiesis	26/494	406/23174	7.46976e-07	8.07445e-06	4.24347e-06	21803/235320/26362/26416/21926/17863/11350/16476/56637/17311/19401/19242/232174/99375/211651/12578/14087/15519/76044/12053/100038882/67588/14308/18708/19229/74131	26
Biological process	GO:0007178	transmembrane receptor protein serine/threonine kinase signaling pathway	24/494	355/23174	7.66591e-07	8.26773e-06	4.34505e-06	19042/21803/14180/26416/11350/16476/22059/20869/20779/386655/17701/14828/69260/15901/17126/12155/50796/14566/11576/17702/18119/12164/14573/22057	24
Biological process	GO:0034644	cellular response to UV	11/494	78/23174	7.93622e-07	8.53995e-06	4.48811e-06	50505/22632/22059/20869/12028/70238/26420/13870/20877/12649/18708	11
Biological process	GO:0046822	regulation of nucleocytoplasmic transport	13/494	112/23174	7.99016e-07	8.57863e-06	4.50844e-06	19042/21803/26416/26413/12568/56637/230908/20218/18747/12578/21849/13605/18708	13
Biological process	GO:0048639	positive regulation of developmental growth	18/494	213/23174	8.04527e-07	8.6023e-06	4.52088e-06	71175/13614/17755/14180/11651/26416/26413/56637/233489/18472/15499/12534/56449/268697/18795/74131/14632/211323	18
Biological process	GO:0034614	cellular response to reactive oxygen species	15/494	150/23174	8.04831e-07	8.6023e-06	4.52088e-06	11651/26362/21926/11350/16476/26413/22059/20779/26420/13649/23939/15499/12578/13605/12633	15
Biological process	GO:0090329	regulation of DNA-dependent DNA replication	9/494	49/23174	8.14084e-07	8.68174e-06	4.56263e-06	22589/17535/12566/214901/12545/12144/67141/12190/20843	9
Biological process	GO:0007289	spermatid nucleus differentiation	7/494	26/23174	8.87574e-07	9.44313e-06	4.96277e-06	58230/15463/57749/71241/20957/20962/68231	7
Biological process	GO:0045927	positive regulation of growth	22/494	308/23174	8.89441e-07	9.44313e-06	4.96277e-06	71175/13614/17755/14180/11651/26416/26413/56637/233489/13649/18472/15499/13205/12534/56449/268697/12520/18795/19229/74131/14632/211323	22
Biological process	GO:0032465	regulation of cytokinesis	11/494	79/23174	9.04508e-07	9.58175e-06	5.03562e-06	218294/216166/12531/16319/20877/18817/23834/13605/12190/20878/229776	11
Biological process	GO:0006469	negative regulation of protein kinase activity	17/494	193/23174	9.12863e-07	9.64882e-06	5.07087e-06	22062/11651/11350/12576/108099/56637/12402/23939/12578/12580/22223/381759/18817/15507/19211/21754/67605	17
Biological process	GO:0031346	positive regulation of cell projection organization	28/494	464/23174	9.18358e-07	9.68543e-06	5.09011e-06	17755/20869/20779/56637/16438/242687/12540/18222/233489/216166/14828/19242/50772/23969/18472/15194/99412/14360/26395/16590/74187/15519/12877/15507/12801/12633/19229/211323	28
Biological process	GO:0000712	resolution of meiotic recombination intermediates	6/494	17/23174	9.22775e-07	9.68914e-06	5.09206e-06	50505/71711/17350/52864/55993/83558	6
Biological process	GO:0007096	regulation of exit from mitosis	6/494	17/23174	9.22775e-07	9.68914e-06	5.09206e-06	218294/21803/12576/11799/229776/328440	6
Biological process	GO:0044774	mitotic DNA integrity checkpoint	10/494	64/23174	9.5595e-07	1.00154e-05	5.26353e-06	22059/71711/17535/11920/17685/117229/235559/12144/12534/23834	10
Biological process	GO:0010332	response to gamma radiation	9/494	50/23174	9.74203e-07	1.0162e-05	5.34056e-06	22059/12028/211651/15499/14375/11920/15270/12190/105787	9
Biological process	GO:0060043	regulation of cardiac muscle cell proliferation	9/494	50/23174	9.74203e-07	1.0162e-05	5.34056e-06	22062/14180/26416/26413/12534/268697/19211/13052/14632	9
Biological process	GO:1903052	positive regulation of proteolysis involved in cellular protein catabolic process	13/494	114/23174	9.8046e-07	1.02049e-05	5.36312e-06	170930/11651/20610/30945/56637/26420/22218/606496/224727/18817/20878/19211/19229	13
Biological process	GO:1903800	positive regulation of production of miRNAs involved in gene silencing by miRNA	5/494	10/23174	9.95187e-07	1.03356e-05	5.43182e-06	83557/21803/22059/13649/26395	5
Biological process	GO:0006261	DNA-dependent DNA replication	14/494	134/23174	1.10229e-06	1.14231e-05	6.00333e-06	225160/22589/71567/17535/12566/214901/12545/12144/23834/66634/67141/12190/19361/20843	14
Biological process	GO:0043393	regulation of protein binding	19/494	241/23174	1.14732e-06	1.1864e-05	6.23502e-06	11651/18591/11350/20779/12568/12028/15525/56637/12540/15901/99412/15499/12578/110213/16765/20877/18817/20878/16848	19
Biological process	GO:0032206	positive regulation of telomere maintenance	9/494	51/23174	1.16082e-06	1.19776e-05	6.29473e-06	26413/21750/22589/13870/17535/52864/11920/20877/18005	9
Biological process	GO:0043161	proteasome-mediated ubiquitin-dependent protein catabolic process	25/494	390/23174	1.19816e-06	1.23362e-05	6.48319e-06	21402/170930/11651/103583/26931/30945/56637/224826/26420/19359/14828/22218/22196/68999/99375/56371/606496/12234/20437/224727/18817/107995/20878/22210/16912	25
Biological process	GO:0048872	homeostasis of number of cells	22/494	315/23174	1.29328e-06	1.32868e-05	6.98276e-06	21803/12558/11651/26362/26416/17863/11350/12028/17311/20683/83964/18970/17289/14605/16590/20586/76044/104271/12053/100038882/18795/74131	22
Biological process	GO:0031334	positive regulation of protein complex assembly	19/494	243/23174	1.2988e-06	1.33148e-05	6.99749e-06	17755/21803/21926/16476/12576/22059/20779/12028/56637/26420/22218/13982/56378/13196/434204/54418/11920/15519/19229	19
Biological process	GO:0030540	female genitalia development	6/494	18/23174	1.35927e-06	1.39048e-05	7.30757e-06	26362/12028/17289/13982/22174/22061	6
Biological process	GO:0001649	osteoblast differentiation	17/494	199/23174	1.39744e-06	1.42646e-05	7.49668e-06	14180/11651/21926/56637/18159/18747/15901/13363/15904/60530/67141/22417/17702/16905/22061/14632/22057	17
Biological process	GO:0031330	negative regulation of cellular catabolic process	19/494	245/23174	1.46824e-06	1.49553e-05	7.85965e-06	13164/19017/11548/11651/110147/22059/15568/230908/99412/12578/77116/224727/12801/18173/17164/67588/14573/53422/22057	19
Biological process	GO:1904031	positive regulation of cyclin-dependent protein kinase activity	7/494	28/23174	1.5397e-06	1.56498e-05	8.22465e-06	11651/18591/12576/20779/13649/70891/23834	7
Biological process	GO:1902105	regulation of leukocyte differentiation	21/494	294/23174	1.57311e-06	1.59553e-05	8.38521e-06	21803/235320/26362/21926/17863/11350/16476/56637/17311/19401/232174/99375/211651/12578/14087/15519/12053/67588/14308/18708/74131	21
Biological process	GO:0110110	positive regulation of animal organ morphogenesis	12/494	101/23174	1.64788e-06	1.66782e-05	8.76513e-06	13614/21803/12028/16438/12540/11835/19242/14595/12578/22417/12633/14573	12
Biological process	GO:0045911	positive regulation of DNA recombination	8/494	40/23174	1.70131e-06	1.71825e-05	9.03014e-06	21803/18861/17350/213389/17685/71890/12144/22210	8
Biological process	GO:0034250	positive regulation of cellular amide metabolic process	14/494	139/23174	1.71518e-06	1.72859e-05	9.0845e-06	83557/13164/12567/21926/26413/15568/233489/20218/230861/606496/13205/12877/19229/20181	14
Biological process	GO:0001655	urogenital system development	23/494	346/23174	1.73506e-06	1.74494e-05	9.17042e-06	83557/21803/235320/18591/12576/20869/12028/19401/11835/13982/18004/15904/17126/224727/19378/15201/12359/22417/12633/19211/14573/20181/22061	23
Biological process	GO:0051574	positive regulation of histone H3-K9 methylation	5/494	11/23174	1.7925e-06	1.79891e-05	9.45405e-06	12189/17863/20937/71241/16905	5
Biological process	GO:0035051	cardiocyte differentiation	16/494	181/23174	1.81757e-06	1.82024e-05	9.56616e-06	108058/11548/13614/21803/18591/22632/26413/56637/19401/13649/77579/606496/16905/13052/20181/211323	16
Biological process	GO:0007565	female pregnancy	15/494	160/23174	1.82802e-06	1.82687e-05	9.60099e-06	11651/26413/20683/13039/11835/19242/13982/13852/15499/12317/21849/70248/22417/18119/20181	15
Biological process	GO:0006289	nucleotide-excision repair	9/494	54/23174	1.91735e-06	1.91213e-05	1.00491e-05	50505/22059/19359/13870/99375/56626/52864/12190/19364	9
Biological process	GO:0042542	response to hydrogen peroxide	13/494	121/23174	1.93937e-06	1.93006e-05	1.01433e-05	26362/11350/22059/20779/23939/14360/15499/12578/13605/105787/12359/19229/16649	13
Biological process	GO:0071560	cellular response to transforming growth factor beta stimulus	17/494	204/23174	1.96722e-06	1.95369e-05	1.02675e-05	19042/19017/21803/16476/22059/20869/20779/386655/14828/23939/69260/14360/17126/12633/18119/12164/14573	17
Biological process	GO:0045778	positive regulation of ossification	12/494	103/23174	2.03409e-06	2.01591e-05	1.05945e-05	71175/235320/19242/18159/15904/67141/22417/16591/100038882/17702/16905/22061	12
Biological process	GO:0018022	peptidyl-lysine methylation	13/494	122/23174	2.12915e-06	2.10138e-05	1.10437e-05	12189/110147/17863/22589/232811/13436/381022/20937/64707/213389/71241/16905/664799	13
Biological process	GO:0042752	regulation of circadian rhythm	13/494	122/23174	2.12915e-06	2.10138e-05	1.10437e-05	19017/103583/22059/56637/26420/230908/75605/12234/20937/64707/20466/12534/105787	13
Biological process	GO:0021549	cerebellum development	12/494	104/23174	2.25561e-06	2.21996e-05	1.16669e-05	11350/22059/12568/22026/14828/14712/77579/53418/26395/22594/67269/14632	12
Biological process	GO:0042113	B cell activation	25/494	404/23174	2.25862e-06	2.21996e-05	1.16669e-05	21803/17863/11350/225160/22059/12028/70238/13870/54125/58230/18861/17350/12578/227059/16590/26909/11920/17685/71890/12053/12520/18708/16848/19229/74131	25
Biological process	GO:0035690	cellular response to drug	24/494	379/23174	2.41944e-06	2.37314e-05	1.24719e-05	12189/21803/12567/110147/26362/18591/21926/11350/26413/22059/20779/22589/23939/14360/15499/12578/12144/13605/19361/12633/18795/19211/14573/18033	24
Biological process	GO:0090092	regulation of transmembrane receptor protein serine/threonine kinase signaling pathway	18/494	230/23174	2.43095e-06	2.377e-05	1.24921e-05	19042/21803/14180/11350/22059/20869/386655/17701/14828/69260/17126/12155/50796/14566/17702/18119/12164/22057	18
Biological process	GO:0022411	cellular component disassembly	23/494	353/23174	2.43334e-06	2.377e-05	1.24921e-05	17755/21926/22059/12568/12028/18472/15194/22367/606496/99412/15499/12578/17997/228421/20586/16765/73804/74187/18817/12534/15512/67588/211323	23
Biological process	GO:0000132	establishment of mitotic spindle orientation	7/494	30/23174	2.55138e-06	2.4872e-05	1.30713e-05	18472/15194/244329/76123/18817/67052/70385	7
Biological process	GO:0071559	response to transforming growth factor beta	17/494	208/23174	2.56565e-06	2.49601e-05	1.31176e-05	19042/19017/21803/16476/22059/20869/20779/386655/14828/23939/69260/14360/17126/12633/18119/12164/14573	17
Biological process	GO:0016032	viral process	20/494	279/23174	2.63452e-06	2.5578e-05	1.34423e-05	21803/26362/21926/16476/22059/12028/20683/230908/22196/99375/18983/433759/13205/59004/17535/20586/21849/100038882/20181/94244	20
Biological process	GO:1903798	regulation of production of miRNAs involved in gene silencing by miRNA	6/494	20/23174	2.73693e-06	2.64829e-05	1.39179e-05	83557/21803/22059/13649/13982/26395	6
Biological process	GO:0033157	regulation of intracellular protein transport	17/494	209/23174	2.73884e-06	2.64829e-05	1.39179e-05	19042/21803/26416/26413/12568/56637/12540/230908/18747/606496/14360/12578/21849/13605/105787/12520/18708	17
Biological process	GO:0046677	response to antibiotic	21/494	305/23174	2.81668e-06	2.71804e-05	1.42844e-05	26362/18591/11350/12576/22059/20779/19401/12402/23939/15901/14360/15499/12578/12534/13605/105787/12359/12801/19211/19229/16649	21
Biological process	GO:0031099	regeneration	14/494	145/23174	2.8401e-06	2.7351e-05	1.43741e-05	30957/21803/26416/16476/12576/16438/19242/26395/12534/20878/12520/12633/19211/14632	14
Biological process	GO:0060068	vagina development	5/494	12/23174	3.01896e-06	2.90149e-05	1.52486e-05	26362/12028/17289/13982/22174	5
Biological process	GO:0090307	mitotic spindle assembly	9/494	57/23174	3.06506e-06	2.93987e-05	1.54503e-05	16211/99412/20877/18817/72119/11799/18005/107995/20843	9
Biological process	GO:0009611	response to wounding	28/494	495/23174	3.21538e-06	3.07785e-05	1.61754e-05	30957/21803/26362/26416/18591/16476/12576/12568/12028/13649/19242/17289/77579/14595/22174/26395/16336/20878/22417/18173/12520/12633/19211/17702/13052/14573/93742/14632	28
Biological process	GO:0001893	maternal placenta development	7/494	31/23174	3.23529e-06	3.08453e-05	1.62105e-05	11651/26413/13039/19242/70248/18119/20181	7
Biological process	GO:0044818	mitotic G2/M transition checkpoint	7/494	31/23174	3.23529e-06	3.08453e-05	1.62105e-05	12189/17535/11920/235559/12144/12534/23834	7
Biological process	GO:0002637	regulation of immunoglobulin production	10/494	73/23174	3.30412e-06	3.1376e-05	1.64894e-05	21803/21926/225160/18861/17350/110213/17685/71890/12053/74131	10
Biological process	GO:0097327	response to antineoplastic agent	10/494	73/23174	3.30412e-06	3.1376e-05	1.64894e-05	12189/21803/12567/18591/22589/15499/12144/19361/105787/14573	10
Biological process	GO:2000379	positive regulation of reactive oxygen species metabolic process	12/494	108/23174	3.36945e-06	3.19327e-05	1.6782e-05	21803/11651/26416/18591/21926/22059/26420/13649/13982/15519/67588/19229	12
Biological process	GO:0033673	negative regulation of kinase activity	17/494	213/23174	3.54193e-06	3.35007e-05	1.76061e-05	22062/11651/11350/12576/108099/56637/12402/23939/12578/12580/22223/381759/18817/15507/19211/21754/67605	17
Biological process	GO:0098900	regulation of action potential	9/494	58/23174	3.56023e-06	3.36071e-05	1.7662e-05	109676/108058/12288/21926/22218/12801/12802/56508/13052	9
Biological process	GO:0046890	regulation of lipid biosynthetic process	15/494	169/23174	3.61975e-06	3.41014e-05	1.79218e-05	12189/19017/16867/11651/12567/12724/18591/21926/20869/26420/13363/22417/22259/14308/18033	15
Biological process	GO:0010259	multicellular organism aging	8/494	44/23174	3.63837e-06	3.42093e-05	1.79785e-05	19366/22059/13870/15194/11920/20937/17685/22061	8
Biological process	GO:0070920	regulation of production of small RNA involved in gene silencing by RNA	6/494	21/23174	3.76286e-06	3.53101e-05	1.8557e-05	83557/21803/22059/13649/13982/26395	6
Biological process	GO:1901653	cellular response to peptide	20/494	286/23174	3.83661e-06	3.59315e-05	1.88835e-05	16867/11651/12567/22059/20779/12568/56637/20683/606496/14360/15499/12566/50933/12877/105787/16591/18795/19211/18708/18033	20
Biological process	GO:0071901	negative regulation of protein serine/threonine kinase activity	12/494	110/23174	4.08964e-06	3.82261e-05	2.00894e-05	22062/11350/12576/56637/23939/12578/12580/22223/381759/18817/19211/21754	12
Biological process	GO:0035136	forelimb morphogenesis	8/494	45/23174	4.34316e-06	4.03795e-05	2.12211e-05	71175/235320/12288/17701/22589/19378/17702/22061	8
Biological process	GO:1902893	regulation of pri-miRNA transcription by RNA polymerase II	8/494	45/23174	4.34316e-06	4.03795e-05	2.12211e-05	21803/18591/16476/22632/22059/13018/20586/18033	8
Biological process	GO:0031023	microtubule organizing center organization	13/494	130/23174	4.34543e-06	4.03795e-05	2.12211e-05	12189/18472/99412/216846/244329/12566/68026/72415/18817/12649/12190/18005/20878	13
Biological process	GO:0051146	striated muscle cell differentiation	21/494	314/23174	4.43864e-06	4.11653e-05	2.16341e-05	108058/11548/13614/21803/12558/11651/26416/22632/56637/19401/17701/77579/232174/606496/22223/12520/12633/16905/13052/20181/211323	21
Biological process	GO:0050900	leukocyte migration	22/494	340/23174	4.49415e-06	4.15549e-05	2.18389e-05	13614/21803/11651/26416/18591/21926/22059/17311/12540/83964/19242/11634/14595/16590/12317/12520/18795/22324/19229/12802/13052/20496	22
Biological process	GO:0090305	nucleic acid phosphodiester bond hydrolysis	12/494	111/23174	4.49807e-06	4.15549e-05	2.18389e-05	50505/12028/13870/71711/83410/15499/12578/108062/17535/75033/26972/67981	12
Biological process	GO:0010833	telomere maintenance via telomere lengthening	10/494	76/23174	4.79469e-06	4.42095e-05	2.3234e-05	50505/26413/20779/21750/52864/11920/20877/15519/19361/18005	10
Biological process	GO:0060281	regulation of oocyte development	5/494	13/23174	4.81982e-06	4.42699e-05	2.32657e-05	18159/230103/381759/20878/54611	5
Biological process	GO:1905879	regulation of oogenesis	5/494	13/23174	4.81982e-06	4.42699e-05	2.32657e-05	18159/230103/381759/20878/54611	5
Biological process	GO:0033598	mammary gland epithelial cell proliferation	7/494	33/23174	5.06579e-06	4.64396e-05	2.4406e-05	26413/12028/13982/75605/12234/12578/12190	7
Biological process	GO:0007063	regulation of sister chromatid cohesion	6/494	22/23174	5.08102e-06	4.64898e-05	2.44324e-05	71175/19357/22589/218914/226026/68549	6
Biological process	GO:0072332	intrinsic apoptotic signaling pathway by p53 class mediator	10/494	77/23174	5.40661e-06	4.93741e-05	2.59482e-05	22062/22059/20869/12028/17701/224727/17685/22187/12190/22061	10
Biological process	GO:0060828	regulation of canonical Wnt signaling pathway	17/494	221/23174	5.8112e-06	5.28664e-05	2.77836e-05	19042/12558/14180/26416/20869/20779/56637/13649/433759/13205/12234/12316/71890/18647/22210/18033/14632	17
Biological process	GO:0061138	morphogenesis of a branching epithelium	17/494	221/23174	5.8112e-06	5.28664e-05	2.77836e-05	13614/21803/18591/21926/11350/20779/11835/13982/14595/75605/12234/22417/17702/14573/20181/22061/20496	17
Biological process	GO:0006479	protein methylation	15/494	176/23174	5.96228e-06	5.40346e-05	2.83975e-05	12189/110147/17863/22589/52463/232811/13436/13018/381022/20937/64707/213389/71241/16905/664799	15
Biological process	GO:0008213	protein alkylation	15/494	176/23174	5.96228e-06	5.40346e-05	2.83975e-05	12189/110147/17863/22589/52463/232811/13436/13018/381022/20937/64707/213389/71241/16905/664799	15
Biological process	GO:0016574	histone ubiquitination	8/494	47/23174	6.10373e-06	5.52115e-05	2.9016e-05	21402/59026/224826/70238/19763/58230/18140/22210	8
Biological process	GO:0072331	signal transduction by p53 class mediator	13/494	135/23174	6.59965e-06	5.95843e-05	3.13141e-05	22062/22059/20869/12028/17701/22589/12578/11920/224727/17685/22187/12190/22061	13
Biological process	GO:0045736	negative regulation of cyclin-dependent protein serine/threonine kinase activity	6/494	23/23174	6.75091e-06	6.08348e-05	3.19713e-05	12576/12578/12580/381759/18817/19211	6
Biological process	GO:2001243	negative regulation of intrinsic apoptotic signaling pathway	11/494	97/23174	7.05514e-06	6.34564e-05	3.3349e-05	20779/23939/433759/13205/26395/110213/60530/15201/56449/15507/12050	11
Biological process	GO:0022037	metencephalon development	12/494	116/23174	7.12647e-06	6.39228e-05	3.35942e-05	11350/22059/12568/22026/14828/14712/77579/53418/26395/22594/67269/14632	12
Biological process	GO:0007018	microtubule-based movement	19/494	273/23174	7.15115e-06	6.39228e-05	3.35942e-05	17755/30957/21750/12540/66722/16211/18472/15194/54418/26395/110350/22223/77053/228421/73804/22187/15507/223697/54562	19
Biological process	GO:0009791	post-embryonic development	13/494	136/23174	7.15778e-06	6.39228e-05	3.35942e-05	22062/30957/17932/11350/12028/16438/22589/13870/18159/75605/17126/20437/11920	13
Biological process	GO:0031648	protein destabilization	8/494	48/23174	7.18903e-06	6.39228e-05	3.35942e-05	103583/20779/15901/15194/12234/12578/20437/18817	8
Biological process	GO:1902808	positive regulation of cell cycle G1/S phase transition	8/494	48/23174	7.18903e-06	6.39228e-05	3.35942e-05	11651/13649/99375/13205/81702/18795/22061/14632	8
Biological process	GO:0002712	regulation of B cell mediated immunity	9/494	63/23174	7.20087e-06	6.39228e-05	3.35942e-05	21803/21926/225160/18861/17350/17685/71890/12053/14125	9
Biological process	GO:0002889	regulation of immunoglobulin mediated immune response	9/494	63/23174	7.20087e-06	6.39228e-05	3.35942e-05	21803/21926/225160/18861/17350/17685/71890/12053/14125	9
Biological process	GO:0043524	negative regulation of neuron apoptotic process	15/494	179/23174	7.32527e-06	6.47549e-05	3.40315e-05	19017/22062/26362/56086/16476/211064/12028/22174/15194/433759/14360/17685/11799/19229/14573	15
Biological process	GO:0035092	sperm chromatin condensation	5/494	14/23174	7.36613e-06	6.47549e-05	3.40315e-05	58230/57749/20957/20962/68231	5
Biological process	GO:0048308	organelle inheritance	5/494	14/23174	7.36613e-06	6.47549e-05	3.40315e-05	26413/22367/99412/26395/12534	5
Biological process	GO:0048313	Golgi inheritance	5/494	14/23174	7.36613e-06	6.47549e-05	3.40315e-05	26413/22367/99412/26395/12534	5
Biological process	GO:0071850	mitotic cell cycle arrest	5/494	14/23174	7.36613e-06	6.47549e-05	3.40315e-05	218294/12576/22059/244329/229776	5
Biological process	GO:0071241	cellular response to inorganic substance	17/494	225/23174	7.37611e-06	6.47549e-05	3.40315e-05	11651/16476/26413/12576/26420/66722/13649/22589/22218/606496/233908/15499/12144/13605/19361/105787/12633	17
Biological process	GO:0032205	negative regulation of telomere maintenance	7/494	35/23174	7.68536e-06	6.70991e-05	3.52635e-05	50505/20779/21750/13870/52864/11920/22594	7
Biological process	GO:0046686	response to cadmium ion	7/494	35/23174	7.68536e-06	6.70991e-05	3.52635e-05	11651/16476/26413/26420/13649/22218/15499	7
Biological process	GO:1902895	positive regulation of pri-miRNA transcription by RNA polymerase II	7/494	35/23174	7.68536e-06	6.70991e-05	3.52635e-05	21803/18591/16476/22059/13018/20586/18033	7
Biological process	GO:0071482	cellular response to light stimulus	11/494	98/23174	7.79675e-06	6.79472e-05	3.57092e-05	50505/22632/22059/20869/12028/70238/26420/13870/20877/12649/18708	11
Biological process	GO:0042110	T cell activation	27/494	491/23174	8.05942e-06	7.01082e-05	3.68448e-05	21803/235320/17863/11350/22059/20869/12028/17120/19401/56218/232174/11634/211651/14360/12578/14087/16590/12144/15519/12053/22417/18173/12520/16848/22324/74131/13052	27
Biological process	GO:0034330	cell junction organization	18/494	251/23174	8.24167e-06	7.14328e-05	3.7541e-05	21803/12558/21926/11350/20779/12540/18222/14712/434204/18747/22239/13605/22417/14619/19211/19229/13052/93742	18
Biological process	GO:0060541	respiratory system development	18/494	251/23174	8.24167e-06	7.14328e-05	3.7541e-05	381489/30957/14180/17932/21926/26413/20683/12540/18222/19401/15901/17126/26395/224727/76123/19378/18119/14632	18
Biological process	GO:0045727	positive regulation of translation	12/494	118/23174	8.50681e-06	7.34637e-05	3.86083e-05	83557/13164/12567/21926/26413/15568/20218/230861/13205/12877/19229/20181	12
Biological process	GO:1901216	positive regulation of neuron death	12/494	118/23174	8.50681e-06	7.34637e-05	3.86083e-05	21926/11350/16476/22059/12568/12028/56637/12540/233489/606496/14360/11920	12
Biological process	GO:0045913	positive regulation of carbohydrate metabolic process	10/494	81/23174	8.58048e-06	7.39659e-05	3.88723e-05	16867/11548/11651/18591/80915/20869/20779/105787/17171/18033	10
Biological process	GO:0060070	canonical Wnt signaling pathway	19/494	277/23174	8.80107e-06	7.56531e-05	3.9759e-05	19042/12558/14180/26416/20869/20779/56637/13649/433759/13205/12234/12316/71890/22417/18647/19211/22210/18033/14632	19
Biological process	GO:0007064	mitotic sister chromatid cohesion	6/494	24/23174	8.83969e-06	7.56531e-05	3.9759e-05	71175/22589/226026/72415/30939/107995	6
Biological process	GO:0032770	positive regulation of monooxygenase activity	6/494	24/23174	8.83969e-06	7.56531e-05	3.9759e-05	11651/21926/21750/13982/19229/14573	6
Biological process	GO:2000637	positive regulation of gene silencing by miRNA	6/494	24/23174	8.83969e-06	7.56531e-05	3.9759e-05	83557/21803/22059/13649/26395/18033	6
Biological process	GO:0032386	regulation of intracellular transport	25/494	437/23174	8.90654e-06	7.60886e-05	3.99878e-05	19042/17755/21803/26416/26413/20779/12568/56637/12540/233489/230908/20218/18747/606496/14360/12578/26395/77116/21849/13605/105787/12801/12520/14125/18708	25
Biological process	GO:0060969	negative regulation of gene silencing	7/494	36/23174	9.36631e-06	7.98733e-05	4.19769e-05	21803/22059/15568/52463/13982/171506/107970	7
Biological process	GO:0006109	regulation of carbohydrate metabolic process	15/494	183/23174	9.57127e-06	8.14754e-05	4.28188e-05	19017/16867/11548/21803/11651/18591/108099/80915/22059/20869/20779/105787/19229/17171/18033	15
Biological process	GO:0051147	regulation of muscle cell differentiation	14/494	161/23174	9.63885e-06	8.19045e-05	4.30443e-05	13614/21803/14180/26416/18591/22632/56637/17701/232174/606496/81702/16590/12633/211323	14
Biological process	GO:1902373	negative regulation of mRNA catabolic process	8/494	50/23174	9.85363e-06	8.35805e-05	4.39251e-05	13164/15568/230908/18173/17164/14573/53422/22057	8
Biological process	GO:0051651	maintenance of location in cell	11/494	101/23174	1.0444e-05	8.84305e-05	4.6474e-05	21402/76407/11651/12568/14828/100986/18472/77053/12316/76123/223697	11
Biological process	GO:0045739	positive regulation of DNA repair	9/494	66/23174	1.06426e-05	8.99527e-05	4.7274e-05	12189/70238/13649/58230/54418/22594/21849/71890/12144	9
Biological process	GO:0044262	cellular carbohydrate metabolic process	19/494	281/23174	1.0786e-05	9.10034e-05	4.78262e-05	19017/16867/11548/11651/108099/80915/22059/20869/20779/56637/56336/14595/16330/606496/77116/53412/19211/19229/17171	19
Biological process	GO:0031497	chromatin assembly	12/494	121/23174	1.10162e-05	9.26181e-05	4.86748e-05	56086/22059/22589/13018/12578/213389/20586/15201/171506/110958/68231/107970	12
Biological process	GO:0048565	digestive tract development	12/494	121/23174	1.10162e-05	9.26181e-05	4.86748e-05	71175/22062/14180/17863/54635/13649/13852/17126/16590/19378/18119/22061	12
Biological process	GO:0010976	positive regulation of neuron projection development	22/494	360/23174	1.11011e-05	9.31675e-05	4.89635e-05	17755/20869/56637/16438/18222/233489/216166/14828/19242/50772/23969/18472/99412/14360/26395/74187/12877/15507/12801/12633/19229/211323	22
Biological process	GO:0033144	negative regulation of intracellular steroid hormone receptor signaling pathway	7/494	37/23174	1.1341e-05	9.48465e-05	4.98459e-05	12189/433759/11614/12317/20586/18119/22061	7
Biological process	GO:0045191	regulation of isotype switching	7/494	37/23174	1.1341e-05	9.48465e-05	4.98459e-05	21803/225160/18861/17350/17685/71890/12053	7
Biological process	GO:0051443	positive regulation of ubiquitin-protein transferase activity	6/494	25/23174	1.14225e-05	9.50282e-05	4.99414e-05	218294/22195/56371/18817/107995/19211	6
Biological process	GO:0060148	positive regulation of posttranscriptional gene silencing	6/494	25/23174	1.14225e-05	9.50282e-05	4.99414e-05	83557/21803/22059/13649/26395/18033	6
Biological process	GO:1904030	negative regulation of cyclin-dependent protein kinase activity	6/494	25/23174	1.14225e-05	9.50282e-05	4.99414e-05	12576/12578/12580/381759/18817/19211	6
Biological process	GO:0055007	cardiac muscle cell differentiation	13/494	142/23174	1.14679e-05	9.50501e-05	4.99529e-05	108058/11548/13614/21803/22632/56637/19401/77579/606496/16905/13052/20181/211323	13
Biological process	GO:0051353	positive regulation of oxidoreductase activity	8/494	51/23174	1.14709e-05	9.50501e-05	4.99529e-05	13614/11651/21926/11350/21750/13982/19229/14573	8
Biological process	GO:0010522	regulation of calcium ion transport into cytosol	11/494	102/23174	1.1485e-05	9.50501e-05	4.99529e-05	109676/108058/16867/21803/11350/12028/15194/14360/110213/56746/19229	11
Biological process	GO:0043491	protein kinase B signaling	15/494	186/23174	1.16376e-05	9.61466e-05	5.05292e-05	83557/21803/11651/26362/21926/20869/20779/19401/13649/17289/22174/15519/67588/19211/211323	15
Biological process	GO:0030902	hindbrain development	14/494	164/23174	1.19078e-05	9.82084e-05	5.16127e-05	11350/22059/12568/22026/14828/14712/77579/53418/26395/22594/20586/19378/67269/14632	14
Biological process	GO:0007098	centrosome cycle	12/494	122/23174	1.19857e-05	9.86806e-05	5.18609e-05	12189/99412/216846/244329/12566/68026/72415/18817/12649/12190/18005/20878	12
Biological process	GO:0006513	protein monoubiquitination	9/494	67/23174	1.20647e-05	9.91591e-05	5.21124e-05	21402/67030/59026/70238/12402/19763/58186/18140/22210	9
Biological process	GO:0043254	regulation of protein complex assembly	25/494	445/23174	1.21312e-05	9.95346e-05	5.23097e-05	19042/17755/21803/21926/11350/16476/12576/22059/20779/12028/56637/26420/22218/13982/56378/13196/434204/13205/54418/11920/17450/16765/15519/105787/19229	25
Biological process	GO:0030326	embryonic limb morphogenesis	13/494	143/23174	1.23739e-05	0.000101177	5.31731e-05	71175/235320/12288/14180/12028/17701/232174/433759/110350/20586/19378/17702/22061	13
Biological process	GO:0035113	embryonic appendage morphogenesis	13/494	143/23174	1.23739e-05	0.000101177	5.31731e-05	71175/235320/12288/14180/12028/17701/232174/433759/110350/20586/19378/17702/22061	13
Biological process	GO:0048709	oligodendrocyte differentiation	11/494	103/23174	1.2615e-05	0.000102972	5.41161e-05	56386/12799/22062/21803/12568/56336/19242/15904/433759/19211/211323	11
Biological process	GO:0034655	nucleobase-containing compound catabolic process	24/494	418/23174	1.26564e-05	0.000103133	5.42011e-05	83557/13164/19017/12799/108099/22059/12028/15568/230908/71711/18983/17350/15499/12578/11920/26972/105787/18173/17164/14573/76850/378430/53422/22057	24
Biological process	GO:0021587	cerebellum morphogenesis	8/494	52/23174	1.3306e-05	0.000108058	5.6789e-05	11350/12568/14828/14712/26395/22594/67269/14632	8
Biological process	GO:0061614	pri-miRNA transcription by RNA polymerase II	8/494	52/23174	1.3306e-05	0.000108058	5.6789e-05	21803/18591/16476/22632/22059/13018/20586/18033	8
Biological process	GO:0006333	chromatin assembly or disassembly	13/494	144/23174	1.33423e-05	0.000108168	5.68467e-05	56086/22059/22589/13018/12578/64707/213389/20586/15201/171506/110958/68231/107970	13
Biological process	GO:0045005	DNA-dependent DNA replication maintenance of fidelity	7/494	38/23174	1.36483e-05	0.00011046	5.80517e-05	225160/22589/71567/17535/12144/12190/19361	7
Biological process	GO:0035264	multicellular organism growth	16/494	212/23174	1.38186e-05	0.00011165	5.86768e-05	71175/12567/22059/19401/22589/13870/11835/18159/18004/15499/20437/11920/20937/12190/102247/20496	16
Biological process	GO:0061008	hepaticobiliary system development	12/494	124/23174	1.41508e-05	0.000114141	5.99858e-05	71175/16476/16438/20683/19401/19242/12578/20586/20878/12633/18119/14632	12
Biological process	GO:0045667	regulation of osteoblast differentiation	13/494	145/23174	1.43766e-05	0.000115765	6.08396e-05	21926/56637/18159/18747/15901/15904/67141/22417/17702/16905/22061/14632/22057	13
Biological process	GO:0033522	histone H2A ubiquitination	6/494	26/23174	1.4583e-05	0.00011723	6.16092e-05	21402/224826/70238/19763/58230/22210	6
Biological process	GO:0050773	regulation of dendrite development	15/494	190/23174	1.50046e-05	0.000120416	6.32838e-05	20869/12568/56637/18222/19242/50772/23969/13196/18472/15901/606496/107995/19211/56508/211323	15
Biological process	GO:0030850	prostate gland development	8/494	53/23174	1.53821e-05	0.000122825	6.45498e-05	12576/20869/11835/13982/15904/19211/20181/22061	8
Biological process	GO:1904705	regulation of vascular smooth muscle cell proliferation	8/494	53/23174	1.53821e-05	0.000122825	6.45498e-05	108058/13614/14180/18591/21926/16476/12576/19211	8
Biological process	GO:1990874	vascular smooth muscle cell proliferation	8/494	53/23174	1.53821e-05	0.000122825	6.45498e-05	108058/13614/14180/18591/21926/16476/12576/19211	8
Biological process	GO:0030238	male sex determination	5/494	16/23174	1.55137e-05	0.000123669	6.49933e-05	14180/11835/13363/11614/50796	5
Biological process	GO:0030111	regulation of Wnt signaling pathway	19/494	289/23174	1.60037e-05	0.000127361	6.69339e-05	19042/12558/14180/26416/11350/20869/20779/56637/13649/433759/13205/12234/20586/12316/71890/18647/22210/18033/14632	19
Biological process	GO:0006998	nuclear envelope organization	7/494	39/23174	1.63305e-05	0.000129746	6.81868e-05	76407/230908/18472/77053/18817/16905/223697	7
Biological process	GO:0032091	negative regulation of protein binding	11/494	106/23174	1.66038e-05	0.000131698	6.92128e-05	11651/18591/12028/56637/15901/99412/12578/110213/16765/20877/20878	11
Biological process	GO:0001763	morphogenesis of a branching structure	17/494	240/23174	1.71629e-05	0.000135906	7.14247e-05	13614/21803/18591/21926/11350/20779/11835/13982/14595/75605/12234/22417/17702/14573/20181/22061/20496	17
Biological process	GO:0019932	second-messenger-mediated signaling	24/494	427/23174	1.79397e-05	0.000141822	7.45334e-05	109676/381489/16867/11548/13614/21926/56637/16438/13649/18159/23939/15194/606496/230103/14748/16336/105787/14125/19229/54611/56508/22210/211323/19217	24
Biological process	GO:0014065	phosphatidylinositol 3-kinase signaling	12/494	127/23174	1.80381e-05	0.000142364	7.48182e-05	13614/11651/18591/21926/54635/19401/12402/13649/14360/12359/18708/211323	12
Biological process	GO:0044270	cellular nitrogen compound catabolic process	25/494	456/23174	1.82984e-05	0.000144179	7.57722e-05	83557/13164/19017/12799/108099/22059/12028/15568/52463/230908/71711/18983/17350/15499/12578/11920/26972/105787/18173/17164/14573/76850/378430/53422/22057	25
Biological process	GO:0048871	multicellular organismal homeostasis	26/494	485/23174	1.83838e-05	0.000144342	7.5858e-05	19017/21926/20869/20779/12028/54635/13649/232174/15901/15499/14748/16765/22187/104271/105787/12801/18173/330890/22259/14308/19229/74131/12164/13052/22061/53422	26
Biological process	GO:0008340	determination of adult lifespan	6/494	27/23174	1.84135e-05	0.000144342	7.5858e-05	19366/22059/15194/11920/20937/17685	6
Biological process	GO:0060045	positive regulation of cardiac muscle cell proliferation	6/494	27/23174	1.84135e-05	0.000144342	7.5858e-05	14180/26416/26413/12534/268697/14632	6
Biological process	GO:0003002	regionalization	22/494	372/23174	1.84402e-05	0.000144342	7.5858e-05	13614/235320/22632/22059/17701/11835/19763/232174/29871/18747/15194/17126/110350/11920/19378/20878/17702/16848/18119/14573/22061/14632	22
Biological process	GO:0016358	dendrite development	19/494	292/23174	1.8481e-05	0.000144425	7.59013e-05	17755/20869/12568/56637/12540/18222/233489/19242/50772/23969/13196/18472/15901/606496/14360/107995/19211/56508/211323	19
Biological process	GO:0002440	production of molecular mediator of immune response	21/494	345/23174	1.85868e-05	0.000145014	7.62109e-05	21803/26416/21926/225160/70238/13870/54125/18970/58230/18861/17350/110213/16590/26909/11920/17685/71890/12053/18173/12520/74131	21
Biological process	GO:0001824	blastocyst development	13/494	149/23174	1.92521e-05	0.000149959	7.88099e-05	20683/52463/57261/20937/20586/12649/76044/239083/12190/18005/67981/18119/328440	13
Biological process	GO:0031062	positive regulation of histone methylation	7/494	40/23174	1.94336e-05	0.000151126	7.9423e-05	12189/17863/52463/13436/20937/71241/16905	7
Biological process	GO:1902806	regulation of cell cycle G1/S phase transition	12/494	128/23174	1.9526e-05	0.000151434	7.95851e-05	11651/22059/216166/13649/99375/13205/81702/18795/19211/22061/14632/52004	12
Biological process	GO:0070374	positive regulation of ERK1 and ERK2 cascade	16/494	218/23174	1.95368e-05	0.000151434	7.95851e-05	108058/21803/18591/11350/16476/20779/54635/19401/13649/13982/26395/16590/12633/19211/19229/18119	16
Biological process	GO:0021782	glial cell development	11/494	108/23174	1.98334e-05	0.000153234	8.05313e-05	56386/21803/11651/18591/12568/56336/13649/15904/19211/93742/211323	11
Biological process	GO:2000106	regulation of leukocyte apoptotic process	11/494	108/23174	1.98334e-05	0.000153234	8.05313e-05	26362/22059/12028/17311/17289/12578/227059/14605/20877/12144/19211	11
Biological process	GO:0045833	negative regulation of lipid metabolic process	10/494	89/23174	1.99568e-05	0.000153939	8.09014e-05	12189/11651/18591/21926/20869/13982/105787/22417/12801/18033	10
Biological process	GO:0071375	cellular response to peptide hormone stimulus	17/494	243/23174	2.01425e-05	0.00015512	8.15224e-05	16867/11651/12567/20779/56637/20683/606496/15499/12566/50933/12877/105787/16591/18795/19211/18708/18033	17
Biological process	GO:0030324	lung development	16/494	219/23174	2.0671e-05	0.000158933	8.35263e-05	381489/30957/14180/21926/26413/20683/12540/18222/15901/17126/26395/224727/76123/19378/18119/14632	16
Biological process	GO:0043405	regulation of MAP kinase activity	19/494	295/23174	2.12965e-05	0.000163479	8.5915e-05	22062/13614/30957/21803/18591/21926/20779/54635/56637/17311/13649/23939/26395/22223/16590/12520/14125/19229/17451	19
Biological process	GO:0034501	protein localization to kinetochore	5/494	17/23174	2.15933e-05	0.000165225	8.68329e-05	12237/20877/67052/12534/70385	5
Biological process	GO:0036124	histone H3-K9 trimethylation	5/494	17/23174	2.15933e-05	0.000165225	8.68329e-05	22589/20937/64707/71241/16905	5
Biological process	GO:0090100	positive regulation of transmembrane receptor protein serine/threonine kinase signaling pathway	11/494	109/23174	2.16427e-05	0.000165337	8.68919e-05	21803/14180/20869/17701/69260/17126/12155/14566/17702/18119/12164	11
Biological process	GO:0043406	positive regulation of MAP kinase activity	16/494	220/23174	2.18633e-05	0.000166755	8.76371e-05	22062/13614/30957/21803/18591/21926/20779/54635/17311/13649/26395/16590/12520/14125/19229/17451	16
Biological process	GO:0048568	embryonic organ development	26/494	490/23174	2.19082e-05	0.000166831	8.76769e-05	71175/13614/21803/14180/11651/18591/17863/26413/22059/54635/17311/20683/19401/17701/13649/15499/17126/26395/16590/20586/21849/19378/73679/18119/14573/14632	26
Biological process	GO:0051222	positive regulation of protein transport	24/494	433/23174	2.24954e-05	0.00017103	8.98835e-05	19042/21803/26416/21926/11350/26413/20779/12568/56637/12540/13649/23957/230908/77579/269800/18747/606496/14360/21849/13605/105787/12520/18708/56508	24
Biological process	GO:0046700	heterocycle catabolic process	25/494	462/23174	2.27486e-05	0.000172679	9.07505e-05	83557/13164/19017/12799/108099/22059/12028/15568/52463/230908/71711/18983/17350/15499/12578/11920/26972/105787/18173/17164/14573/76850/378430/53422/22057	25
Biological process	GO:0016925	protein sumoylation	7/494	41/23174	2.30075e-05	0.000173874	9.13784e-05	170930/20610/22218/22196/12578/59004/21849	7
Biological process	GO:0007530	sex determination	6/494	28/23174	2.30154e-05	0.000173874	9.13784e-05	14180/11835/13363/11614/50796/22417	6
Biological process	GO:0010458	exit from mitosis	6/494	28/23174	2.30154e-05	0.000173874	9.13784e-05	218294/21803/12576/11799/229776/328440	6
Biological process	GO:2000116	regulation of cysteine-type endopeptidase activity	16/494	221/23174	2.31161e-05	0.000174358	9.16328e-05	11651/21926/110651/20779/12028/26420/15194/14360/15499/13205/12578/11799/12633/18119/22061/16912	16
Biological process	GO:0021575	hindbrain morphogenesis	8/494	56/23174	2.33123e-05	0.000175283	9.21189e-05	11350/12568/14828/14712/26395/22594/67269/14632	8
Biological process	GO:0044773	mitotic DNA damage checkpoint	8/494	56/23174	2.33123e-05	0.000175283	9.21189e-05	22059/71711/17535/11920/17685/117229/12144/12534	8
Biological process	GO:0060485	mesenchyme development	18/494	272/23174	2.4407e-05	0.000182819	9.60791e-05	13614/21803/14180/26413/56637/17311/17701/15194/17126/21849/71890/19378/22417/19211/17702/18119/14573/20181	18
Biological process	GO:0030323	respiratory tube development	16/494	222/23174	2.44322e-05	0.000182819	9.60791e-05	381489/30957/14180/21926/26413/20683/12540/18222/15901/17126/26395/224727/76123/19378/18119/14632	16
Biological process	GO:0021885	forebrain cell migration	9/494	73/23174	2.44679e-05	0.000182819	9.60791e-05	26362/12568/13649/18472/22174/77053/223697/545428/211323	9
Biological process	GO:2000779	regulation of double-strand break repair	9/494	73/23174	2.44679e-05	0.000182819	9.60791e-05	15499/54418/71890/60530/19362/12144/12649/19361/104271	9
Biological process	GO:0035107	appendage morphogenesis	14/494	175/23174	2.4786e-05	0.000184617	9.70243e-05	71175/235320/12288/14180/12028/17701/22589/232174/433759/110350/20586/19378/17702/22061	14
Biological process	GO:0035108	limb morphogenesis	14/494	175/23174	2.4786e-05	0.000184617	9.70243e-05	71175/235320/12288/14180/12028/17701/22589/232174/433759/110350/20586/19378/17702/22061	14
Biological process	GO:0061136	regulation of proteasomal protein catabolic process	14/494	176/23174	2.64128e-05	0.000196427	0.000103231	170930/11651/30945/56637/26420/19359/22218/18747/606496/12234/224727/22187/18817/20878	14
Biological process	GO:0071887	leukocyte apoptotic process	12/494	132/23174	2.66003e-05	0.000197513	0.000103802	11651/26362/22059/12028/17311/17289/12578/227059/14605/20877/12144/19211	12
Biological process	GO:0006687	glycosphingolipid metabolic process	7/494	42/23174	2.7106e-05	0.000200022	0.00010512	56386/53897/57370/12028/56336/16590/14421	7
Biological process	GO:0007080	mitotic metaphase plate congression	7/494	42/23174	2.7106e-05	0.000200022	0.00010512	17120/16211/228421/73804/67052/70385/268697	7
Biological process	GO:0048255	mRNA stabilization	7/494	42/23174	2.7106e-05	0.000200022	0.00010512	13164/15568/230908/18173/17164/14573/53422	7
Biological process	GO:0055023	positive regulation of cardiac muscle tissue growth	7/494	42/23174	2.7106e-05	0.000200022	0.00010512	13614/14180/26416/26413/12534/268697/14632	7
Biological process	GO:0071248	cellular response to metal ion	13/494	154/23174	2.7342e-05	0.000201452	0.000105872	11651/16476/26413/12576/26420/66722/13649/22218/606496/233908/15499/13605/105787	13
Biological process	GO:2000377	regulation of reactive oxygen species metabolic process	15/494	200/23174	2.74675e-05	0.000202064	0.000106193	12189/21803/11651/26416/18591/21926/22059/26420/13649/13982/14360/15519/12633/67588/19229	15
Biological process	GO:0031398	positive regulation of protein ubiquitination	11/494	112/23174	2.79535e-05	0.000205322	0.000107906	12189/218294/59026/26420/22195/14828/56371/606496/18817/107995/19211	11
Biological process	GO:0044403	symbiont process	21/494	355/23174	2.83441e-05	0.000207871	0.000109245	21803/26362/21926/16476/225160/22059/12028/20683/230908/22196/99375/18983/433759/13205/59004/17535/20586/21849/100038882/20181/94244	21
Biological process	GO:0010800	positive regulation of peptidyl-threonine phosphorylation	6/494	29/23174	2.84997e-05	0.000208691	0.000109676	21803/26413/108099/56637/606496/18817	6
Biological process	GO:0048736	appendage development	15/494	201/23174	2.9113e-05	0.000212208	0.000111524	71175/235320/12288/14180/12028/19401/17701/22589/232174/433759/110350/20586/19378/17702/22061	15
Biological process	GO:0060173	limb development	15/494	201/23174	2.9113e-05	0.000212208	0.000111524	71175/235320/12288/14180/12028/19401/17701/22589/232174/433759/110350/20586/19378/17702/22061	15
Biological process	GO:0042391	regulation of membrane potential	24/494	440/23174	2.91135e-05	0.000212208	0.000111524	109676/108058/13614/12288/11651/21926/16476/20779/12568/12028/56637/100986/19242/22218/15194/12578/77116/22187/12801/19211/19229/12802/56508/13052	24
Biological process	GO:0007204	positive regulation of cytosolic calcium ion concentration	20/494	329/23174	2.98044e-05	0.000216912	0.000113997	114875/109676/108058/16867/11548/13614/21803/12288/11350/12028/16438/13982/15194/14360/110213/56746/12801/18795/19229/19217	20
Biological process	GO:0002683	negative regulation of immune system process	25/494	470/23174	3.02013e-05	0.000219466	0.000115339	21803/235320/11651/26362/21926/225160/17311/17120/19401/17289/99375/22174/18983/12578/110213/14605/11920/76044/12053/12801/18795/22259/18708/19229/12802	25
Biological process	GO:1902369	negative regulation of RNA catabolic process	8/494	58/23174	3.03072e-05	0.0002199	0.000115567	13164/15568/230908/18173/17164/14573/53422/22057	8
Biological process	GO:0001666	response to hypoxia	15/494	202/23174	3.08449e-05	0.000223462	0.000117439	108058/13614/11651/22059/16438/54418/26395/110213/11920/20937/64707/21335/12877/12359/19211	15
Biological process	GO:0055123	digestive system development	12/494	134/23174	3.09065e-05	0.000223568	0.000117494	71175/22062/14180/17863/54635/13649/13852/17126/16590/19378/18119/22061	12
Biological process	GO:0010721	negative regulation of cell development	22/494	385/23174	3.10954e-05	0.000224593	0.000118033	83557/22062/21803/22632/22059/12568/56637/19242/18159/13196/18472/15901/15904/606496/230103/12317/12316/74203/381759/19211/18119/211323	22
Biological process	GO:0045834	positive regulation of lipid metabolic process	13/494	156/23174	3.13288e-05	0.000225937	0.00011874	19017/21803/11651/18591/21926/20779/12540/26420/22417/12520/22259/14308/19229	13
Biological process	GO:0042307	positive regulation of protein import into nucleus	7/494	43/23174	3.17868e-05	0.000228894	0.000120294	21803/26416/26413/230908/21849/13605/18708	7
Biological process	GO:0002377	immunoglobulin production	17/494	252/23174	3.20333e-05	0.000230168	0.000120963	21803/21926/225160/70238/13870/54125/18970/58230/18861/17350/110213/26909/11920/17685/71890/12053/74131	17
Biological process	GO:0048863	stem cell differentiation	16/494	227/23174	3.20604e-05	0.000230168	0.000120963	83557/13614/26413/22059/56637/17311/17701/19242/13982/54427/16590/19378/171506/17702/14573/22061	16
Biological process	GO:0048015	phosphatidylinositol-mediated signaling	13/494	157/23174	3.3506e-05	0.000239215	0.000125718	13614/11651/18591/21926/54635/19401/12402/13649/14360/12359/18795/18708/211323	13
Biological process	GO:0060402	calcium ion transport into cytosol	13/494	157/23174	3.3506e-05	0.000239215	0.000125718	109676/108058/16867/21803/11350/12028/16438/15194/14360/110213/56746/18795/19229	13
Biological process	GO:1903169	regulation of calcium ion transmembrane transport	13/494	157/23174	3.3506e-05	0.000239215	0.000125718	109676/108058/16867/21803/12288/11350/12028/22218/15194/14360/15512/56746/19229	13
Biological process	GO:0070838	divalent metal ion transport	25/494	473/23174	3.35212e-05	0.000239215	0.000125718	114875/109676/108058/16867/21803/12288/18591/17863/11350/233280/12568/12028/16438/22218/14612/15194/14360/110213/227059/15512/56746/12801/18173/18795/19229	25
Biological process	GO:0031297	replication fork processing	6/494	30/23174	3.49868e-05	0.0002493	0.000131018	225160/22589/17535/12144/12190/19361	6
Biological process	GO:0045926	negative regulation of growth	18/494	280/23174	3.57804e-05	0.000253619	0.000133287	22062/21803/21926/22632/12576/22059/20869/12568/17701/606496/13205/12578/12580/20586/14566/12053/19211/13052	18
Biological process	GO:0051209	release of sequestered calcium ion into cytosol	11/494	115/23174	3.57936e-05	0.000253619	0.000133287	109676/108058/16867/21803/11350/12028/16438/15194/56746/18795/19229	11
Biological process	GO:0034728	nucleosome organization	12/494	136/23174	3.58056e-05	0.000253619	0.000133287	56086/22589/58230/13018/213389/20586/57749/171506/114642/20962/68231/107970	12
Biological process	GO:0097553	calcium ion transmembrane import into cytosol	12/494	136/23174	3.58056e-05	0.000253619	0.000133287	109676/108058/16867/21803/11350/12028/16438/15194/14360/56746/18795/19229	12
Biological process	GO:0010569	regulation of double-strand break repair via homologous recombination	7/494	44/23174	3.71122e-05	0.000262092	0.000137741	71890/60530/19362/12144/12649/19361/104271	7
Biological process	GO:0019439	aromatic compound catabolic process	25/494	476/23174	3.71668e-05	0.000262092	0.000137741	83557/13164/19017/12799/108099/22059/12028/15568/52463/230908/71711/18983/17350/15499/12578/11920/26972/105787/18173/17164/14573/76850/378430/53422/22057	25
Biological process	GO:0072511	divalent inorganic cation transport	25/494	476/23174	3.71668e-05	0.000262092	0.000137741	114875/109676/108058/16867/21803/12288/18591/17863/11350/233280/12568/12028/16438/22218/14612/15194/14360/110213/227059/15512/56746/12801/18173/18795/19229	25
Biological process	GO:0010970	transport along microtubule	13/494	159/23174	3.82598e-05	0.000268832	0.000141283	17755/30957/21750/12540/18472/15194/26395/110350/22223/77053/22187/15507/223697	13
Biological process	GO:0099111	microtubule-based transport	13/494	159/23174	3.82598e-05	0.000268832	0.000141283	17755/30957/21750/12540/18472/15194/26395/110350/22223/77053/22187/15507/223697	13
Biological process	GO:0045619	regulation of lymphocyte differentiation	14/494	182/23174	3.82918e-05	0.000268832	0.000141283	21803/235320/26362/17863/11350/19401/232174/211651/12578/14087/15519/12053/67588/74131	14
Biological process	GO:0031848	protection from non-homologous end joining at telomere	4/494	10/23174	3.86868e-05	0.00027041	0.000142112	50505/21750/13870/22594	4
Biological process	GO:0035093	spermatogenesis, exchange of chromosomal proteins	4/494	10/23174	3.86868e-05	0.00027041	0.000142112	58230/57749/20962/68231	4
Biological process	GO:1900193	regulation of oocyte maturation	4/494	10/23174	3.86868e-05	0.00027041	0.000142112	18159/230103/381759/20878	4
Biological process	GO:0071156	regulation of cell cycle arrest	8/494	60/23174	3.89769e-05	0.000272039	0.000142968	12189/22062/21803/12567/22059/18747/12578/12317	8
Biological process	GO:2000345	regulation of hepatocyte proliferation	5/494	19/23174	3.91702e-05	0.00027259	0.000143258	16438/19242/12578/12633/14632	5
Biological process	GO:2000773	negative regulation of cellular senescence	5/494	19/23174	3.91702e-05	0.00027259	0.000143258	11350/21750/67141/12053/22061	5
Biological process	GO:0061448	connective tissue development	18/494	282/23174	3.9274e-05	0.000272914	0.000143428	19017/381489/13614/21803/235320/14180/12567/26416/18591/19401/17701/18159/15904/22187/12633/17702/16905/12164	18
Biological process	GO:0048017	inositol lipid-mediated signaling	13/494	160/23174	4.08499e-05	0.000283452	0.000148966	13614/11651/18591/21926/54635/19401/12402/13649/14360/12359/18795/18708/211323	13
Biological process	GO:0051403	stress-activated MAPK cascade	17/494	257/23174	4.10357e-05	0.000284327	0.000149426	22062/13614/30957/11651/26416/21926/26413/22026/12540/26420/13649/18472/26395/14125/17164/18795/19229	17
Biological process	GO:0051283	negative regulation of sequestering of calcium ion	11/494	117/23174	4.20145e-05	0.000290687	0.000152768	109676/108058/16867/21803/11350/12028/16438/15194/56746/18795/19229	11
Biological process	GO:0048588	developmental cell growth	17/494	258/23174	4.30838e-05	0.00029659	0.000155871	108058/11548/13614/17755/11350/22632/20869/12568/56637/233489/18472/606496/381022/15519/14566/20878/211323	17
Biological process	GO:0031952	regulation of protein autophosphorylation	7/494	45/23174	4.31486e-05	0.00029659	0.000155871	18591/16476/26931/20779/54635/17535/21754	7
Biological process	GO:0035196	production of miRNAs involved in gene silencing by miRNA	7/494	45/23174	4.31486e-05	0.00029659	0.000155871	83557/21803/22059/13649/13982/26395/76850	7
Biological process	GO:0060421	positive regulation of heart growth	7/494	45/23174	4.31486e-05	0.00029659	0.000155871	13614/14180/26416/26413/12534/268697/14632	7
Biological process	GO:0048754	branching morphogenesis of an epithelial tube	14/494	184/23174	4.31788e-05	0.00029659	0.000155871	13614/21803/21926/11350/20779/11835/13982/14595/75605/12234/22417/17702/14573/20496	14
Biological process	GO:0022407	regulation of cell-cell adhesion	22/494	394/23174	4.3957e-05	0.000301501	0.000158452	21803/235320/11651/26416/21926/17863/11350/20779/17120/19401/23939/12578/26395/71890/12144/15519/12053/22417/12520/18708/74131/18119	22
Biological process	GO:0045840	positive regulation of mitotic nuclear division	8/494	61/23174	4.40332e-05	0.000301589	0.000158498	71175/13614/21803/18591/21926/226026/50796/11799	8
Biological process	GO:1904951	positive regulation of establishment of protein localization	24/494	452/23174	4.46367e-05	0.000305285	0.00016044	19042/21803/26416/21926/11350/26413/20779/12568/56637/12540/13649/23957/230908/77579/269800/18747/606496/14360/21849/13605/105787/12520/18708/56508	24
Biological process	GO:0038034	signal transduction in absence of ligand	9/494	79/23174	4.63386e-05	0.000313842	0.000164938	21926/12028/56637/17311/23939/606496/14360/12050/14573	9
Biological process	GO:0043525	positive regulation of neuron apoptotic process	9/494	79/23174	4.63386e-05	0.000313842	0.000164938	21926/16476/22059/12568/12028/56637/12540/606496/11920	9
Biological process	GO:0051279	regulation of release of sequestered calcium ion into cytosol	9/494	79/23174	4.63386e-05	0.000313842	0.000164938	109676/108058/16867/21803/11350/12028/15194/56746/19229	9
Biological process	GO:0097192	extrinsic apoptotic signaling pathway in absence of ligand	9/494	79/23174	4.63386e-05	0.000313842	0.000164938	21926/12028/56637/17311/23939/606496/14360/12050/14573	9
Biological process	GO:0010660	regulation of muscle cell apoptotic process	10/494	98/23174	4.63488e-05	0.000313842	0.000164938	108058/13614/22059/56637/15499/12578/12633/19211/18708/19229	10
Biological process	GO:0021761	limbic system development	10/494	98/23174	4.63488e-05	0.000313842	0.000164938	22062/12568/12028/56637/18472/15904/433759/22594/22187/19211	10
Biological process	GO:2001237	negative regulation of extrinsic apoptotic signaling pathway	10/494	98/23174	4.63488e-05	0.000313842	0.000164938	12189/21926/20779/11835/23939/15194/14360/12633/16905/14573	10
Biological process	GO:0051282	regulation of sequestering of calcium ion	11/494	119/23174	4.91441e-05	0.000332298	0.000174637	109676/108058/16867/21803/11350/12028/16438/15194/56746/18795/19229	11
Biological process	GO:1904356	regulation of telomere maintenance via telomere lengthening	8/494	62/23174	4.96248e-05	0.000335073	0.000176095	50505/26413/20779/21750/52864/11920/20877/18005	8
Biological process	GO:0010799	regulation of peptidyl-threonine phosphorylation	7/494	46/23174	4.99671e-05	0.000336431	0.000176809	21803/26413/108099/56637/606496/18817/93742	7
Biological process	GO:0032007	negative regulation of TOR signaling	7/494	46/23174	4.99671e-05	0.000336431	0.000176809	20869/56637/224826/606496/11920/105787/67605	7
Biological process	GO:0032436	positive regulation of proteasomal ubiquitin-dependent protein catabolic process	9/494	80/23174	5.12408e-05	0.000343563	0.000180557	170930/11651/30945/56637/26420/22218/606496/18817/20878	9
Biological process	GO:1904427	positive regulation of calcium ion transmembrane transport	9/494	80/23174	5.12408e-05	0.000343563	0.000180557	109676/16867/12288/11350/12028/22218/15194/15512/56746	9
Biological process	GO:0006688	glycosphingolipid biosynthetic process	5/494	20/23174	5.13146e-05	0.000343563	0.000180557	56386/53897/57370/56336/14421	5
Biological process	GO:0045948	positive regulation of translational initiation	5/494	20/23174	5.13146e-05	0.000343563	0.000180557	13164/21926/20218/13205/20181	5
Biological process	GO:0007097	nuclear migration	6/494	32/23174	5.15013e-05	0.000344052	0.000180814	12540/77579/18472/77053/21335/223697	6
Biological process	GO:0006473	protein acetylation	14/494	187/23174	5.15321e-05	0.000344052	0.000180814	12189/21803/56637/57261/433759/13018/224727/67773/20586/20466/12649/12190/71988/105787	14
Biological process	GO:0072593	reactive oxygen species metabolic process	18/494	288/23174	5.16427e-05	0.000344309	0.000180949	12189/13614/21803/11651/26416/18591/21926/22059/26420/13649/13982/14360/15519/12359/12633/67588/22324/19229	18
Biological process	GO:0051208	sequestering of calcium ion	11/494	120/23174	5.30827e-05	0.000353415	0.000185735	109676/108058/16867/21803/11350/12028/16438/15194/56746/18795/19229	11
Biological process	GO:0007179	transforming growth factor beta receptor signaling pathway	13/494	165/23174	5.62244e-05	0.00037381	0.000196453	19042/21803/16476/22059/20869/20779/386655/14828/69260/17126/18119/12164/14573	13
Biological process	GO:0031098	stress-activated protein kinase signaling cascade	18/494	290/23174	5.64727e-05	0.000374563	0.000196849	22062/13614/30957/11651/26416/21926/26413/22026/12540/26420/13649/18472/18004/26395/14125/17164/18795/19229	18
Biological process	GO:0072384	organelle transport along microtubule	9/494	81/23174	5.65734e-05	0.000374563	0.000196849	17755/12540/18472/15194/26395/22223/77053/22187/223697	9
Biological process	GO:1903312	negative regulation of mRNA metabolic process	9/494	81/23174	5.65734e-05	0.000374563	0.000196849	13164/15568/230908/14105/18173/17164/14573/53422/22057	9
Biological process	GO:0001889	liver development	11/494	121/23174	5.72893e-05	0.000378252	0.000198788	16476/16438/20683/19401/19242/12578/20586/20878/12633/18119/14632	11
Biological process	GO:0032434	regulation of proteasomal ubiquitin-dependent protein catabolic process	11/494	121/23174	5.72893e-05	0.000378252	0.000198788	170930/11651/30945/56637/26420/19359/22218/606496/224727/18817/20878	11
Biological process	GO:0031050	dsRNA processing	7/494	47/23174	5.76431e-05	0.000379014	0.000199188	83557/21803/22059/13649/13982/26395/76850	7
Biological process	GO:0070918	production of small RNA involved in gene silencing by RNA	7/494	47/23174	5.76431e-05	0.000379014	0.000199188	83557/21803/22059/13649/13982/26395/76850	7
Biological process	GO:0071300	cellular response to retinoic acid	7/494	47/23174	5.76431e-05	0.000379014	0.000199188	19401/232174/11920/19378/73614/20899/19229	7
Biological process	GO:0045876	positive regulation of sister chromatid cohesion	4/494	11/23174	5.97692e-05	0.000391912	0.000205966	71175/19357/226026/68549	4
Biological process	GO:0051657	maintenance of organelle location	4/494	11/23174	5.97692e-05	0.000391912	0.000205966	100986/18472/12316/76123	4
Biological process	GO:1901800	positive regulation of proteasomal protein catabolic process	10/494	101/23174	6.00702e-05	0.000393345	0.000206719	170930/11651/30945/56637/26420/22218/606496/224727/18817/20878	10
Biological process	GO:0006308	DNA catabolic process	6/494	33/23174	6.18204e-05	0.000403143	0.000211869	12028/71711/15499/12578/11920/26972	6
Biological process	GO:0032467	positive regulation of cytokinesis	6/494	33/23174	6.18204e-05	0.000403143	0.000211869	218294/12531/20877/23834/13605/229776	6
Biological process	GO:0090218	positive regulation of lipid kinase activity	6/494	33/23174	6.18204e-05	0.000403143	0.000211869	21803/18591/20779/12540/12520/19229	6
Biological process	GO:0045637	regulation of myeloid cell differentiation	15/494	215/23174	6.31669e-05	0.000411362	0.000216188	21803/235320/26416/21926/16476/56637/17311/19401/99375/76044/100038882/67588/14308/18708/19229	15
Biological process	GO:0051480	regulation of cytosolic calcium ion concentration	21/494	376/23174	6.50043e-05	0.000422749	0.000222173	114875/109676/108058/16867/11548/13614/21803/12288/11350/12028/16438/13982/15194/14360/14748/110213/56746/12801/18795/19229/19217	21
Biological process	GO:0008356	asymmetric cell division	5/494	21/23174	6.61745e-05	0.000425672	0.000223709	235320/69260/99412/12316/20899	5
Biological process	GO:0031065	positive regulation of histone deacetylation	5/494	21/23174	6.61745e-05	0.000425672	0.000223709	71175/21803/22059/69260/12053	5
Biological process	GO:0002714	positive regulation of B cell mediated immunity	7/494	48/23174	6.62573e-05	0.000425672	0.000223709	21803/21926/18861/17350/17685/71890/14125	7
Biological process	GO:0002891	positive regulation of immunoglobulin mediated immune response	7/494	48/23174	6.62573e-05	0.000425672	0.000223709	21803/21926/18861/17350/17685/71890/14125	7
Biological process	GO:0022602	ovulation cycle process	7/494	48/23174	6.62573e-05	0.000425672	0.000223709	16867/20779/13982/14566/11576/229357/14308	7
Biological process	GO:0043489	RNA stabilization	7/494	48/23174	6.62573e-05	0.000425672	0.000223709	13164/15568/230908/18173/17164/14573/53422	7
Biological process	GO:0043550	regulation of lipid kinase activity	7/494	48/23174	6.62573e-05	0.000425672	0.000223709	21803/18591/20779/12540/12520/18708/19229	7
Biological process	GO:0044786	cell cycle DNA replication	7/494	48/23174	6.62573e-05	0.000425672	0.000223709	22589/17535/12545/67141/12190/19361/20843	7
Biological process	GO:1904591	positive regulation of protein import	7/494	48/23174	6.62573e-05	0.000425672	0.000223709	21803/26416/26413/230908/21849/13605/18708	7
Biological process	GO:0002573	myeloid leukocyte differentiation	15/494	216/23174	6.65799e-05	0.000427169	0.000224496	21803/26416/21926/16476/20779/56637/17311/19401/99375/18472/16590/12520/18795/14308/18708	15
Biological process	GO:0032869	cellular response to insulin stimulus	14/494	192/23174	6.86111e-05	0.000439609	0.000231033	11651/12567/20779/56637/20683/606496/12566/50933/12877/105787/16591/18795/19211/18708	14
Biological process	GO:0043647	inositol phosphate metabolic process	8/494	65/23174	7.0062e-05	0.000448302	0.000235602	114875/16867/16330/77116/18795/19211/19229/17171	8
Biological process	GO:0010657	muscle cell apoptotic process	10/494	103/23174	7.10218e-05	0.000453835	0.00023851	108058/13614/22059/56637/15499/12578/12633/19211/18708/19229	10
Biological process	GO:0051091	positive regulation of DNA-binding transcription factor activity	16/494	244/23174	7.60719e-05	0.000485455	0.000255127	19017/13614/21803/11651/21926/11835/13982/22196/12578/16590/20586/12359/12633/67588/19211/18119	16
Biological process	GO:0060401	cytosolic calcium ion transport	13/494	170/23174	7.6399e-05	0.00048689	0.000255882	109676/108058/16867/21803/11350/12028/16438/15194/14360/110213/56746/18795/19229	13
Biological process	GO:0030308	negative regulation of cell growth	14/494	194/23174	7.6714e-05	0.000488245	0.000256594	21803/22632/12576/22059/20869/12568/17701/606496/13205/12578/12580/20586/14566/12053	14
Biological process	GO:0030705	cytoskeleton-dependent intracellular transport	13/494	171/23174	8.11114e-05	0.000515544	0.00027094	17755/30957/21750/12540/18472/15194/26395/110350/22223/77053/22187/15507/223697	13
Biological process	GO:0002700	regulation of production of molecular mediator of immune response	12/494	148/23174	8.18316e-05	0.000519429	0.000272982	21803/26416/21926/225160/18861/17350/110213/17685/71890/12053/12520/74131	12
Biological process	GO:0002064	epithelial cell development	16/494	246/23174	8.37365e-05	0.000530814	0.000278965	18591/21926/19401/22589/100986/11835/13982/18472/14595/15901/12155/20586/50796/102247/93742/22061	16
Biological process	GO:1901652	response to peptide	21/494	383/23174	8.43875e-05	0.00053423	0.000280761	16867/11651/12567/26416/22059/20779/12568/56637/20683/606496/14360/15499/12566/50933/12877/105787/16591/18795/19211/18708/18033	21
Biological process	GO:0065004	protein-DNA complex assembly	13/494	172/23174	8.60734e-05	0.000543459	0.000285611	56086/22059/22589/21374/13982/20586/15201/171506/13404/19361/68231/107970/240697	13
Biological process	GO:1901654	response to ketone	13/494	172/23174	8.60734e-05	0.000543459	0.000285611	21803/11651/12567/20779/11835/71702/15499/20466/105787/12633/22259/14573/19217	13
Biological process	GO:1902930	regulation of alcohol biosynthetic process	7/494	50/23174	8.66455e-05	0.000546348	0.000287129	16867/12724/21926/22417/19229/17171/18033	7
Biological process	GO:0030183	B cell differentiation	12/494	149/23174	8.73131e-05	0.000548859	0.000288449	17863/11350/22059/12028/54125/16590/11920/17685/12053/18708/16848/19229	12
Biological process	GO:0008156	negative regulation of DNA replication	6/494	35/23174	8.73891e-05	0.000548859	0.000288449	22059/218914/17535/67141/12190/20843	6
Biological process	GO:1904707	positive regulation of vascular smooth muscle cell proliferation	6/494	35/23174	8.73891e-05	0.000548859	0.000288449	108058/13614/14180/18591/21926/16476	6
Biological process	GO:1900112	regulation of histone H3-K9 trimethylation	4/494	12/23174	8.81443e-05	0.000552874	0.000290559	22589/20937/71241/16905	4
Biological process	GO:0048661	positive regulation of smooth muscle cell proliferation	10/494	106/23174	9.0606e-05	0.000567568	0.000298281	19017/108058/13614/14180/11651/18591/21926/16476/56637/13649	10
Biological process	GO:0045580	regulation of T cell differentiation	12/494	150/23174	9.31075e-05	0.000582472	0.000306114	21803/235320/17863/11350/19401/232174/211651/12578/14087/15519/12053/74131	12
Biological process	GO:0043618	regulation of transcription from RNA polymerase II promoter in response to stress	7/494	51/23174	9.86051e-05	0.000616056	0.000323764	16476/22059/23939/15499/110213/20466/12649	7
Biological process	GO:0035115	embryonic forelimb morphogenesis	6/494	36/23174	0.000102994	0.000642632	0.000337731	71175/12288/17701/19378/17702/22061	6
Biological process	GO:0042060	wound healing	20/494	360/23174	0.000103672	0.000645173	0.000339066	21803/26362/26416/18591/12576/13649/19242/17289/77579/14595/22174/16336/22417/18173/12520/12633/19211/17702/13052/93742	20
Biological process	GO:0051961	negative regulation of nervous system development	20/494	360/23174	0.000103672	0.000645173	0.000339066	83557/22062/21803/21926/22059/12568/56637/19242/13196/18472/18747/15901/15904/606496/77116/12317/12316/74203/19211/211323	20
Biological process	GO:1903311	regulation of mRNA metabolic process	16/494	251/23174	0.000105933	0.000658385	0.00034601	13164/15568/230908/14105/20218/18983/15499/70248/268697/12877/18173/17164/14573/378430/53422/22057	16
Biological process	GO:0000281	mitotic cytokinesis	8/494	69/23174	0.000107752	0.000668821	0.000351494	77579/216846/16765/16319/18817/13605/11799/12190	8
Biological process	GO:0002262	myeloid cell homeostasis	13/494	176/23174	0.000108643	0.000673242	0.000353818	26362/26416/12028/17311/20683/83964/17289/16590/20586/76044/12053/100038882/18795	13
Biological process	GO:0032970	regulation of actin filament-based process	21/494	390/23174	0.000108747	0.000673242	0.000353818	109676/13614/21803/12288/11350/242687/12540/13039/83964/22218/56378/434204/15901/54418/16765/13605/22417/21754/18708/19229/93742	21
Biological process	GO:1903076	regulation of protein localization to plasma membrane	10/494	109/23174	0.000114586	0.00070847	0.000372331	108058/21803/11651/21926/12568/18222/233489/13649/11835/18708	10
Biological process	GO:1903725	regulation of phospholipid metabolic process	8/494	70/23174	0.000119418	0.000737391	0.000387531	21803/18591/20779/12540/77116/12520/18708/19229	8
Biological process	GO:0051647	nucleus localization	6/494	37/23174	0.000120733	0.000743583	0.000390785	12540/77579/18472/77053/21335/223697	6
Biological process	GO:0071158	positive regulation of cell cycle arrest	6/494	37/23174	0.000120733	0.000743583	0.000390785	12189/22062/21803/22059/18747/12578	6
Biological process	GO:0036293	response to decreased oxygen levels	15/494	228/23174	0.000122008	0.000749499	0.000393894	108058/13614/11651/22059/16438/54418/26395/110213/11920/20937/64707/21335/12877/12359/19211	15
Biological process	GO:0046578	regulation of Ras protein signal transduction	15/494	228/23174	0.000122008	0.000749499	0.000393894	108058/11548/12558/11350/228998/17311/12402/26395/227743/16765/13605/12053/19417/22324/211323	15
Biological process	GO:0008637	apoptotic mitochondrial changes	10/494	110/23174	0.000123685	0.000758825	0.000398795	22062/11651/16476/22059/12028/56637/26420/606496/12578/16905	10
Biological process	GO:0034329	cell junction assembly	14/494	203/23174	0.000124368	0.000762036	0.000400483	12558/21926/11350/20779/14712/434204/18747/22239/13605/22417/14619/19211/19229/93742	14
Biological process	GO:0007183	SMAD protein complex assembly	4/494	13/23174	0.000125177	0.000762095	0.000400514	19042/21803/386655/17126	4
Biological process	GO:0034086	maintenance of sister chromatid cohesion	4/494	13/23174	0.000125177	0.000762095	0.000400514	71175/22589/226026/68549	4
Biological process	GO:0043247	telomere maintenance in response to DNA damage	4/494	13/23174	0.000125177	0.000762095	0.000400514	50505/21750/13870/22594	4
Biological process	GO:0045136	development of secondary sexual characteristics	4/494	13/23174	0.000125177	0.000762095	0.000400514	16867/21803/12028/14595	4
Biological process	GO:0051299	centrosome separation	4/494	13/23174	0.000125177	0.000762095	0.000400514	216846/12649/18005/20878	4
Biological process	GO:0048546	digestive tract morphogenesis	7/494	53/23174	0.000126557	0.000769514	0.000404413	71175/22062/13649/13852/17126/18119/22061	7
Biological process	GO:0018394	peptidyl-lysine acetylation	12/494	155/23174	0.000127305	0.000772091	0.000405767	12189/21803/57261/433759/13018/224727/67773/20586/20466/12649/12190/105787	12
Biological process	GO:0051896	regulation of protein kinase B signaling	12/494	155/23174	0.000127305	0.000772091	0.000405767	83557/21803/26362/21926/20869/20779/19401/13649/15519/67588/19211/211323	12
Biological process	GO:1901617	organic hydroxy compound biosynthetic process	15/494	229/23174	0.00012806	0.000775685	0.000407656	114875/13121/16867/12724/21926/22059/15194/16833/105787/22417/16591/18795/19229/17171/18033	15
Biological process	GO:0060395	SMAD protein signal transduction	9/494	90/23174	0.000129356	0.000782536	0.000411256	21803/16476/17126/12155/14566/11576/18119/12164/22057	9
Biological process	GO:0006301	postreplication repair	5/494	24/23174	0.000131115	0.000789174	0.000414745	12189/68026/17685/58186/22210	5
Biological process	GO:0043921	modulation by host of viral transcription	5/494	24/23174	0.000131115	0.000789174	0.000414745	16476/20683/230908/433759/20586	5
Biological process	GO:0052312	modulation of transcription in other organism involved in symbiotic interaction	5/494	24/23174	0.000131115	0.000789174	0.000414745	16476/20683/230908/433759/20586	5
Biological process	GO:0052472	modulation by host of symbiont transcription	5/494	24/23174	0.000131115	0.000789174	0.000414745	16476/20683/230908/433759/20586	5
Biological process	GO:0014068	positive regulation of phosphatidylinositol 3-kinase signaling	8/494	71/23174	0.000132107	0.000794143	0.000417356	18591/21926/54635/19401/12402/14360/12359/211323	8
Biological process	GO:0006816	calcium ion transport	22/494	425/23174	0.000132483	0.000795399	0.000418016	114875/109676/108058/16867/21803/12288/18591/17863/11350/12568/12028/16438/22218/14612/15194/14360/110213/15512/56746/12801/18795/19229	22
Biological process	GO:1905330	regulation of morphogenesis of an epithelium	10/494	111/23174	0.000133387	0.00079982	0.00042034	21803/21926/11350/18222/11835/13982/22417/19211/14573/20181	10
Biological process	GO:0051168	nuclear export	11/494	133/23174	0.000134741	0.00080692	0.000424071	19042/21803/225160/12568/56637/66011/20218/18747/12578/12317/83454	11
Biological process	GO:0072595	maintenance of protein localization in organelle	6/494	38/23174	0.000140811	0.000842011	0.000442513	21402/11651/12568/14828/77053/223697	6
Biological process	GO:0043543	protein acylation	15/494	231/23174	0.000140953	0.000842011	0.000442513	12189/19042/21803/56637/57261/433759/13018/224727/67773/20586/20466/12649/12190/71988/105787	15
Biological process	GO:0032350	regulation of hormone metabolic process	7/494	54/23174	0.000142767	0.000851775	0.000447645	19017/16867/17932/12724/21926/22417/18033	7
Biological process	GO:0001892	embryonic placenta development	10/494	112/23174	0.000143724	0.000853948	0.000448787	11651/18591/26413/20683/13649/15499/26395/21849/73679/18119	10
Biological process	GO:0005976	polysaCellular componentharide metabolic process	10/494	112/23174	0.000143724	0.000853948	0.000448787	11548/21803/11651/18591/108099/56637/56336/606496/53412/18033	10
Biological process	GO:0010821	regulation of mitochondrion organization	11/494	134/23174	0.000144027	0.000853948	0.000448787	19017/11651/22059/12028/56637/15194/606496/12578/105787/67588/16905	11
Biological process	GO:0035194	posttranscriptional gene silencing by RNA	11/494	134/23174	0.000144027	0.000853948	0.000448787	83557/21803/22059/15568/13649/13982/26395/83456/98558/76850/18033	11
Biological process	GO:0051928	positive regulation of calcium ion transport	11/494	134/23174	0.000144027	0.000853948	0.000448787	109676/16867/12288/18591/11350/12028/16438/22218/15194/15512/56746	11
Biological process	GO:0051099	positive regulation of binding	14/494	206/23174	0.000145135	0.000859451	0.000451678	71175/21803/11350/12568/15525/56637/19401/57261/218914/15499/20586/16765/21849/16848	14
Biological process	GO:0003013	circulatory system process	24/494	489/23174	0.000149678	0.000885252	0.000465238	109676/108058/11548/13614/21803/12288/11651/18591/21926/20779/12540/13649/11835/22218/18159/606496/14360/26395/16591/12801/18708/54611/13052/19217	24
Biological process	GO:0051056	regulation of small GTPase mediated signal transduction	16/494	259/23174	0.000152194	0.000899018	0.000472473	108058/11548/12558/11350/20779/228998/17311/12402/26395/227743/16765/13605/12053/19417/22324/211323	16
Biological process	GO:0033135	regulation of peptidyl-serine phosphorylation	12/494	158/23174	0.000152597	0.000900286	0.000473139	21803/11651/21926/12028/56637/13649/100986/606496/227743/71890/15519/105787	12
Biological process	GO:1990778	protein localization to cell periphery	19/494	342/23174	0.000153379	0.000903777	0.000474974	109676/108058/21803/12558/11651/21926/12568/56637/18222/233489/13649/11835/23969/26395/76123/18817/12520/18708/56508	19
Biological process	GO:0001764	neuron migration	13/494	183/23174	0.000160534	0.000940771	0.000494416	71175/30957/26362/12568/211064/12028/56637/77579/18472/14360/12316/15519/211323	13
Biological process	GO:1903708	positive regulation of hemopoiesis	14/494	208/23174	0.000160589	0.000940771	0.000494416	21803/235320/26362/26416/21926/17863/16476/56637/17311/19401/15519/12053/100038882/74131	14
Biological process	GO:0031397	negative regulation of protein ubiquitination	8/494	73/23174	0.000160832	0.000940771	0.000494416	11651/11350/12568/14360/12578/71890/67141/100038882	8
Biological process	GO:0050810	regulation of steroid biosynthetic process	8/494	73/23174	0.000160832	0.000940771	0.000494416	19017/16867/12724/21926/13363/22417/14308/18033	8
Biological process	GO:0031100	animal organ regeneration	5/494	25/23174	0.000161038	0.000940771	0.000494416	21803/16438/12534/20878/14632	5
Biological process	GO:1901798	positive regulation of signal transduction by p53 class mediator	5/494	25/23174	0.000161038	0.000940771	0.000494416	22062/17701/12578/11920/22187	5
Biological process	GO:1905939	regulation of gonad development	5/494	25/23174	0.000161038	0.000940771	0.000494416	20779/16336/50796/14566/22417	5
Biological process	GO:0043551	regulation of phosphatidylinositol 3-kinase activity	6/494	39/23174	0.000163444	0.000951328	0.000499964	21803/18591/20779/12540/18708/19229	6
Biological process	GO:0046885	regulation of hormone biosynthetic process	6/494	39/23174	0.000163444	0.000951328	0.000499964	19017/16867/12724/21926/22417/18033	6
Biological process	GO:1900087	positive regulation of G1/S transition of mitotic cell cycle	6/494	39/23174	0.000163444	0.000951328	0.000499964	11651/13649/99375/13205/81702/18795	6
Biological process	GO:0017148	negative regulation of translation	11/494	136/23174	0.000164239	0.000954789	0.000501783	83557/19401/18983/13205/12317/74203/12877/76850/378430/53422/22057	11
Biological process	GO:2000045	regulation of G1/S transition of mitotic cell cycle	10/494	114/23174	0.000166433	0.000966366	0.000507867	11651/22059/216166/13649/99375/13205/81702/18795/19211/52004	10
Biological process	GO:0097305	response to alcohol	14/494	209/23174	0.000168836	0.000979126	0.000514572	12189/21803/11651/12567/19401/14360/17126/12144/12534/19361/105787/12801/19211/19217	14
Biological process	GO:0006470	protein dephosphorylation	15/494	235/23174	0.000170159	0.000985601	0.000517976	19042/218294/21803/103583/21926/26931/80915/20869/15194/12234/227059/19256/12531/53412/19211	15
Biological process	GO:0032769	negative regulation of monooxygenase activity	4/494	14/23174	0.000172302	0.000993184	0.000521961	56637/12801/12802/18033	4
Biological process	GO:0071803	positive regulation of podosome assembly	4/494	14/23174	0.000172302	0.000993184	0.000521961	21926/20779/26420/13196	4
Biological process	GO:1903430	negative regulation of cell maturation	4/494	14/23174	0.000172302	0.000993184	0.000521961	56637/18159/230103/381759	4
Biological process	GO:1903624	regulation of DNA catabolic process	4/494	14/23174	0.000172302	0.000993184	0.000521961	12028/15499/12578/11920	4
Biological process	GO:0016441	posttranscriptional gene silencing	11/494	137/23174	0.000175216	0.00100876	0.000530149	83557/21803/22059/15568/13649/13982/26395/83456/98558/76850/18033	11
Biological process	GO:0021766	hippocampus development	8/494	74/23174	0.000177014	0.00101666	0.000534297	22062/12568/56637/18472/15904/433759/22594/19211	8
Biological process	GO:1901983	regulation of protein acetylation	8/494	74/23174	0.000177014	0.00101666	0.000534297	12189/21803/56637/433759/13018/20466/12649/105787	8
Biological process	GO:0008361	regulation of cell size	14/494	210/23174	0.000177446	0.00101791	0.000534956	22062/13614/17755/11651/12567/11350/12568/56637/18472/15519/19211/67605/20496/211323	14
Biological process	GO:0043901	negative regulation of multi-organism process	13/494	185/23174	0.000178801	0.00102445	0.000538393	21926/16476/230908/18159/433759/230103/17535/12317/21849/381759/100038882/229357/18119	13
Biological process	GO:0043620	regulation of DNA-templated transcription in response to stress	7/494	56/23174	0.000180233	0.00103018	0.000541404	16476/22059/23939/15499/110213/20466/12649	7
Biological process	GO:0048538	thymus development	7/494	56/23174	0.000180233	0.00103018	0.000541404	17863/11350/26413/17120/11634/26395/11920	7
Biological process	GO:2001236	regulation of extrinsic apoptotic signaling pathway	12/494	161/23174	0.00018207	0.00103943	0.000546267	12189/21926/20779/12028/11835/23939/15194/14360/12633/19211/16905/14573	12
Biological process	GO:0007338	single fertilization	11/494	138/23174	0.00018681	0.00106522	0.000559818	114875/11835/13852/14595/75605/381759/12745/56746/18795/328440/107970	11
Biological process	GO:0007409	axonogenesis	23/494	466/23174	0.000188571	0.00107397	0.000564419	56386/12799/17755/30957/12558/11350/20869/12568/56637/18222/233489/56336/77579/18472/99412/26395/22223/16765/15519/19211/14573/545428/211323	23
Biological process	GO:1905332	positive regulation of morphogenesis of an epithelium	6/494	40/23174	0.000188858	0.00107433	0.000564604	21803/11350/18222/11835/22417/14573	6
Biological process	GO:0007389	pattern specification process	23/494	467/23174	0.000194491	0.00110384	0.000580117	13614/235320/22632/22059/17701/11835/19763/232174/29871/18747/15194/17126/110350/11920/19378/20878/17702/16848/18119/14573/22061/14632/54562	23
Biological process	GO:0045843	negative regulation of striated muscle tissue development	8/494	75/23174	0.00019451	0.00110384	0.000580117	22062/21803/22632/606496/14605/56449/19211/13052	8
Biological process	GO:0000737	DNA catabolic process, endonucleolytic	5/494	26/23174	0.000195909	0.00110553	0.000581002	12028/71711/15499/12578/26972	5
Biological process	GO:0060065	uterus development	5/494	26/23174	0.000195909	0.00110553	0.000581002	71175/16867/20779/13982/75605	5
Biological process	GO:0072574	hepatocyte proliferation	5/494	26/23174	0.000195909	0.00110553	0.000581002	16438/19242/12578/12633/14632	5
Biological process	GO:0072575	epithelial cell proliferation involved in liver morphogenesis	5/494	26/23174	0.000195909	0.00110553	0.000581002	16438/19242/12578/12633/14632	5
Biological process	GO:0071456	cellular response to hypoxia	9/494	95/23174	0.000195966	0.00110553	0.000581002	11651/22059/54418/26395/110213/20937/64707/12877/19211	9
Biological process	GO:0042593	glucose homeostasis	16/494	265/23174	0.000197608	0.00111216	0.000584487	83557/11548/12288/11651/17932/20869/18747/12578/26395/20586/20466/11799/105787/12801/330890/18708	16
Biological process	GO:0050807	regulation of synapse organization	16/494	265/23174	0.000197608	0.00111216	0.000584487	12558/26416/21926/11350/12568/56637/12540/18222/233489/19242/77579/18472/14360/107995/19211/56508	16
Biological process	GO:0008202	steroid metabolic process	17/494	293/23174	0.000202588	0.00113884	0.00059851	19017/13121/16867/12724/21926/13982/232174/13363/11614/16590/11576/105787/12359/16890/22417/14308/18033	17
Biological process	GO:0033500	carbohydrate homeostasis	16/494	266/23174	0.000206223	0.00115791	0.000608531	83557/11548/12288/11651/17932/20869/18747/12578/26395/20586/20466/11799/105787/12801/330890/18708	16
Biological process	GO:0014066	regulation of phosphatidylinositol 3-kinase signaling	9/494	96/23174	0.000212228	0.00119022	0.000625513	18591/21926/54635/19401/12402/13649/14360/12359/211323	9
Biological process	GO:0090287	regulation of cellular response to growth factor stimulus	16/494	267/23174	0.000215162	0.00120526	0.000633416	19042/21803/14180/18591/11350/22059/20869/386655/17701/14828/69260/17126/22417/12633/17702/22057	16
Biological process	GO:0003298	physiological muscle hypertrophy	6/494	41/23174	0.000217289	0.0012129	0.000637432	108058/11548/13614/22632/56637/606496	6
Biological process	GO:0003301	physiological cardiac muscle hypertrophy	6/494	41/23174	0.000217289	0.0012129	0.000637432	108058/11548/13614/22632/56637/606496	6
Biological process	GO:0061049	cell growth involved in cardiac muscle cell development	6/494	41/23174	0.000217289	0.0012129	0.000637432	108058/11548/13614/22632/56637/606496	6
Biological process	GO:0050890	cognition	18/494	323/23174	0.000218597	0.00121735	0.000639769	71175/16867/11548/12288/110147/16476/12568/233489/13649/19242/53418/18472/15194/16590/12801/18795/19211/16875	18
Biological process	GO:0070371	ERK1 and ERK2 cascade	18/494	323/23174	0.000218597	0.00121735	0.000639769	108058/21803/18591/11350/16476/26413/20779/54635/19401/13649/13982/26395/16590/12633/19211/19229/18119/56705	18
Biological process	GO:0046165	alcohol biosynthetic process	11/494	141/23174	0.000225567	0.0012547	0.000659398	114875/13121/16867/12724/21926/105787/22417/18795/19229/17171/18033	11
Biological process	GO:0033235	positive regulation of protein sumoylation	4/494	15/23174	0.00023101	0.00128198	0.000673737	170930/22196/12578/59004	4
Biological process	GO:0060965	negative regulation of gene silencing by miRNA	4/494	15/23174	0.00023101	0.00128198	0.000673737	21803/22059/15568/13982	4
Biological process	GO:0048635	negative regulation of muscle organ development	8/494	77/23174	0.00023377	0.00129579	0.000680995	22062/21803/22632/606496/14605/56449/19211/13052	8
Biological process	GO:0010038	response to metal ion	16/494	269/23174	0.000234053	0.00129586	0.000681029	11651/12567/16476/26413/12576/56637/26420/66722/13649/22218/15194/606496/233908/15499/13605/105787	16
Biological process	GO:0045830	positive regulation of isotype switching	5/494	27/23174	0.000236248	0.00130498	0.000685822	21803/18861/17350/17685/71890	5
Biological process	GO:0060008	Sertoli cell differentiation	5/494	27/23174	0.000236248	0.00130498	0.000685822	19401/22589/100986/11614/50796	5
Biological process	GO:0006611	protein export from nucleus	10/494	119/23174	0.000236757	0.00130627	0.000686503	19042/21803/225160/12568/56637/66011/18747/12578/12317/83454	10
Biological process	GO:0048762	mesenchymal cell differentiation	14/494	216/23174	0.000237493	0.00130882	0.00068784	13614/21803/26413/56637/17311/17701/17126/21849/71890/19378/22417/19211/17702/14573	14
Biological process	GO:0099173	postsynapse organization	13/494	191/23174	0.000244694	0.00134695	0.000707879	12558/12568/242687/12540/18222/19242/77579/18472/14360/77116/19211/56508/14573	13
Biological process	GO:0007265	Ras protein signal transduction	21/494	414/23174	0.000246224	0.0013538	0.000711482	108058/11548/12558/11350/16476/228998/17311/242687/12540/12402/16211/26395/227743/16765/21849/76123/13605/12053/19417/22324/211323	21
Biological process	GO:0001836	release of cytochrome c from mitochondria	7/494	59/23174	0.000250961	0.00137668	0.000723502	22062/11651/16476/22059/12028/26420/16905	7
Biological process	GO:0051148	negative regulation of muscle cell differentiation	7/494	59/23174	0.000250961	0.00137668	0.000723502	14180/18591/22632/17701/606496/81702/12633	7
Biological process	GO:0051924	regulation of calcium ion transport	16/494	271/23174	0.000254367	0.00139376	0.000732479	109676/108058/16867/21803/12288/18591/11350/12028/16438/22218/15194/14360/110213/15512/56746/19229	16
Biological process	GO:0010634	positive regulation of epithelial cell migration	11/494	143/23174	0.000255015	0.0013957	0.000733501	21803/11651/18591/11350/16476/20779/20683/16336/12317/15507/19229	11
Biological process	GO:1901862	negative regulation of muscle tissue development	8/494	78/23174	0.000255705	0.00139788	0.000734643	22062/21803/22632/606496/14605/56449/19211/13052	8
Biological process	GO:0048771	tissue remodeling	13/494	192/23174	0.000257482	0.00140598	0.000738901	11548/26362/22059/20779/12028/56637/13649/19242/17289/14595/12578/14308/19229	13
Biological process	GO:0055013	cardiac muscle cell development	9/494	99/23174	0.000267879	0.00146107	0.000767857	108058/11548/13614/22632/56637/77579/606496/16905/13052	9
Biological process	GO:0050808	synapse organization	22/494	447/23174	0.000268779	0.00146431	0.000769558	12558/26416/18591/21926/11350/12568/56637/242687/12540/18222/233489/14712/19242/77579/18472/14360/77116/107995/19211/56508/14573/211323	22
Biological process	GO:1902107	positive regulation of leukocyte differentiation	12/494	168/23174	0.000270267	0.00147073	0.000772933	21803/235320/26362/21926/17863/16476/56637/17311/19401/15519/12053/74131	12
Biological process	GO:0000209	protein polyubiquitination	13/494	193/23174	0.000270837	0.00147205	0.000773627	12189/103583/30945/59026/70238/22195/12402/58230/68999/12234/12578/67588/22210	13
Biological process	GO:0061013	regulation of mRNA catabolic process	10/494	121/23174	0.000271127	0.00147205	0.000773627	13164/15568/230908/18983/18173/17164/14573/378430/53422/22057	10
Biological process	GO:0070661	leukocyte proliferation	18/494	329/23174	0.000273369	0.00148253	0.000779136	21803/11350/22059/12028/56637/17311/17120/14360/12578/227059/11920/15201/12144/12053/22417/18173/12520/74131	18
Biological process	GO:0032496	response to lipopolysaCellular componentharide	19/494	358/23174	0.000273973	0.00148412	0.00077997	21803/11651/12567/26362/26416/21926/11350/16476/26413/110651/19401/15499/12801/18173/17164/22259/12802/18033/19217	19
Biological process	GO:0060324	face development	7/494	60/23174	0.000278959	0.00150942	0.000793264	71175/21803/26413/19401/17701/26395/19378	7
Biological process	GO:0031063	regulation of histone deacetylation	5/494	28/23174	0.000282603	0.00152395	0.0008009	71175/21803/22059/69260/12053	5
Biological process	GO:0072576	liver morphogenesis	5/494	28/23174	0.000282603	0.00152395	0.0008009	16438/19242/12578/12633/14632	5
Biological process	GO:0090312	positive regulation of protein deacetylation	5/494	28/23174	0.000282603	0.00152395	0.0008009	71175/21803/22059/69260/12053	5
Biological process	GO:0042771	intrinsic apoptotic signaling pathway in response to DNA damage by p53 class mediator	6/494	43/23174	0.000284208	0.00153087	0.000804537	22062/22059/224727/17685/12190/22061	6
Biological process	GO:0050821	protein stabilization	12/494	169/23174	0.000285427	0.00153397	0.000806165	109676/22059/17701/22218/12578/224727/12317/15519/66634/19211/18708/22210	12
Biological process	GO:0097237	cellular response to toxic substance	12/494	169/23174	0.000285427	0.00153397	0.000806165	26362/18591/21926/11350/22059/20779/23939/15499/12578/13605/19211/18033	12
Biological process	GO:0044419	interspecies interaction between organisms	21/494	419/23174	0.000289142	0.00155219	0.00081574	21803/26362/21926/16476/225160/22059/12028/20683/230908/22196/99375/18983/433759/13205/59004/17535/20586/21849/100038882/20181/94244	21
Biological process	GO:0050803	regulation of synapse structure or activity	16/494	275/23174	0.000299616	0.0016066	0.000844339	12558/26416/21926/11350/12568/56637/12540/18222/233489/19242/77579/18472/14360/107995/19211/56508	16
Biological process	GO:0018027	peptidyl-lysine dimethylation	4/494	16/23174	0.000302842	0.00161844	0.000850558	110147/20937/64707/71241	4
Biological process	GO:0032570	response to progesterone	4/494	16/23174	0.000302842	0.00161844	0.000850558	21803/20779/22259/19217	4
Biological process	GO:0035112	genitalia morphogenesis	4/494	16/23174	0.000302842	0.00161844	0.000850558	71175/11835/320558/22061	4
Biological process	GO:0016311	dephosphorylation	19/494	361/23174	0.000304074	0.0016232	0.000853062	19042/218294/21803/103583/21926/26931/80915/20869/16330/15194/12234/223989/227059/77116/19256/12531/53412/19211/229776	19
Biological process	GO:0052548	regulation of endopeptidase activity	18/494	332/23174	0.000304982	0.00162623	0.000854653	11651/21926/110651/20779/12028/233489/26420/15194/433759/14360/15499/13205/12578/11799/12633/18119/22061/16912	18
Biological process	GO:0006446	regulation of translational initiation	7/494	61/23174	0.000309412	0.0016452	0.000864625	13164/21926/211064/19401/20218/13205/20181	7
Biological process	GO:1905207	regulation of cardiocyte differentiation	7/494	61/23174	0.000309412	0.0016452	0.000864625	13614/21803/22632/56637/13649/606496/211323	7
Biological process	GO:0051153	regulation of striated muscle cell differentiation	10/494	123/23174	0.000309576	0.0016452	0.000864625	13614/21803/26416/22632/56637/17701/232174/606496/12633/211323	10
Biological process	GO:0030317	flagellated sperm motility	9/494	101/23174	0.000311305	0.00164888	0.000866556	66722/27356/69260/16330/16833/56746/22210/54562/107970	9
Biological process	GO:0050848	regulation of calcium-mediated signaling	9/494	101/23174	0.000311305	0.00164888	0.000866556	16867/21926/56637/16438/23939/15194/14125/19229/211323	9
Biological process	GO:0097722	sperm motility	9/494	101/23174	0.000311305	0.00164888	0.000866556	66722/27356/69260/16330/16833/56746/22210/54562/107970	9
Biological process	GO:0043281	regulation of cysteine-type endopeptidase activity involved in apoptotic process	13/494	196/23174	0.000314511	0.00166401	0.00087451	11651/21926/110651/20779/12028/26420/15499/13205/12578/11799/12633/18119/22061	13
Biological process	GO:0006664	glycolipid metabolic process	8/494	81/23174	0.00033182	0.00175364	0.000921615	56386/53897/57370/12028/56336/16590/22239/14421	8
Biological process	GO:0007264	small GTPase mediated signal transduction	23/494	485/23174	0.00033311	0.00175851	0.000924173	108058/11548/12558/11350/16476/20779/228998/17311/242687/12540/12402/16211/26395/227743/16765/21849/76123/13605/12053/19417/22324/56508/211323	23
Biological process	GO:0019218	regulation of steroid metabolic process	9/494	102/23174	0.000335107	0.00176353	0.000926813	19017/16867/12724/21926/13363/16590/22417/14308/18033	9
Biological process	GO:0051897	positive regulation of protein kinase B signaling	9/494	102/23174	0.000335107	0.00176353	0.000926813	83557/21803/26362/21926/20779/19401/13649/15519/211323	9
Biological process	GO:0043552	positive regulation of phosphatidylinositol 3-kinase activity	5/494	29/23174	0.000335541	0.00176353	0.000926813	21803/18591/20779/12540/19229	5
Biological process	GO:0071480	cellular response to gamma radiation	5/494	29/23174	0.000335541	0.00176353	0.000926813	22059/15499/14375/11920/15270	5
Biological process	GO:0070372	regulation of ERK1 and ERK2 cascade	17/494	306/23174	0.000336114	0.0017646	0.000927371	108058/21803/18591/11350/16476/20779/54635/19401/13649/13982/26395/16590/12633/19211/19229/18119/56705	17
Biological process	GO:0006278	RNA-dependent DNA biosynthetic process	7/494	62/23174	0.000342476	0.00179011	0.000940781	26413/20779/21750/11920/20877/15519/18005	7
Biological process	GO:0007004	telomere maintenance via telomerase	7/494	62/23174	0.000342476	0.00179011	0.000940781	26413/20779/21750/11920/20877/15519/18005	7
Biological process	GO:0021695	cerebellar cortex development	7/494	62/23174	0.000342476	0.00179011	0.000940781	12568/14828/77579/53418/26395/67269/14632	7
Biological process	GO:1905268	negative regulation of chromatin organization	7/494	62/23174	0.000342476	0.00179011	0.000940781	12189/52463/13436/20466/171506/22210/107970	7
Biological process	GO:0032868	response to insulin	14/494	224/23174	0.000344158	0.00179694	0.000944367	11651/12567/20779/56637/20683/606496/12566/50933/12877/105787/16591/18795/19211/18708	14
Biological process	GO:0015980	energy derivation by oxidation of organic compounds	15/494	251/23174	0.000345698	0.001803	0.000947553	19017/11548/11651/108099/22059/12028/56637/18747/606496/12534/268697/12359/16591/53412/18597	15
Biological process	GO:0033138	positive regulation of peptidyl-serine phosphorylation	10/494	125/23174	0.000352474	0.00183633	0.000965073	21803/11651/21926/56637/13649/100986/606496/227743/71890/15519	10
Biological process	GO:0007009	plasma membrane organization	9/494	103/23174	0.000360391	0.00187553	0.000985671	109676/11651/11835/77579/23969/13196/434204/13852/19211	9
Biological process	GO:1903509	liposaCellular componentharide metabolic process	8/494	82/23174	0.00036095	0.00187639	0.000986124	56386/53897/57370/12028/56336/16590/22239/14421	8
Biological process	GO:0070588	calcium ion transmembrane transport	16/494	280/23174	0.00036583	0.00189805	0.000997507	109676/108058/16867/21803/12288/11350/12028/16438/22218/15194/14360/15512/56746/12801/18795/19229	16
Biological process	GO:0018023	peptidyl-lysine trimethylation	6/494	45/23174	0.000366311	0.00189805	0.000997507	22589/232811/20937/64707/71241/16905	6
Biological process	GO:0090184	positive regulation of kidney development	6/494	45/23174	0.000366311	0.00189805	0.000997507	83557/21803/18591/22417/12633/14573	6
Biological process	GO:0009612	response to mechanical stimulus	12/494	174/23174	0.000372511	0.00192808	0.00101329	11651/26416/21926/16476/56637/26420/19242/15194/14360/16590/18033/20496	12
Biological process	GO:2000756	regulation of peptidyl-lysine acetylation	7/494	63/23174	0.000378311	0.00195598	0.00102795	12189/21803/433759/13018/20466/12649/105787	7
Biological process	GO:0006986	response to unfolded protein	9/494	104/23174	0.000387229	0.00199803	0.00105005	12028/14828/15499/110213/15519/15512/15507/78284/18708	9
Biological process	GO:0045793	positive regulation of cell size	4/494	17/23174	0.00038938	0.00199803	0.00105005	22062/13614/12567/15519	4
Biological process	GO:0051000	positive regulation of nitric-oxide synthase activity	4/494	17/23174	0.00038938	0.00199803	0.00105005	11651/21750/13982/19229	4
Biological process	GO:0055012	ventricular cardiac muscle cell differentiation	4/494	17/23174	0.00038938	0.00199803	0.00105005	19401/77579/16905/20181	4
Biological process	GO:0060149	negative regulation of posttranscriptional gene silencing	4/494	17/23174	0.00038938	0.00199803	0.00105005	21803/22059/15568/13982	4
Biological process	GO:0060967	negative regulation of gene silencing by RNA	4/494	17/23174	0.00038938	0.00199803	0.00105005	21803/22059/15568/13982	4
Biological process	GO:1905244	regulation of modification of synaptic structure	4/494	17/23174	0.00038938	0.00199803	0.00105005	11350/56637/12540/77579	4
Biological process	GO:1903321	negative regulation of protein modification by small protein conjugation or removal	8/494	83/23174	0.000392129	0.00200998	0.00105633	11651/11350/12568/14360/12578/71890/67141/100038882	8
Biological process	GO:0048384	retinoic acid receptor signaling pathway	5/494	30/23174	0.000395652	0.00201935	0.00106126	19401/232174/12317/19378/20181	5
Biological process	GO:0051569	regulation of histone H3-K4 methylation	5/494	30/23174	0.000395652	0.00201935	0.00106126	12189/110147/17863/13436/664799	5
Biological process	GO:0055022	negative regulation of cardiac muscle tissue growth	5/494	30/23174	0.000395652	0.00201935	0.00106126	22062/22632/606496/19211/13052	5
Biological process	GO:0061117	negative regulation of heart growth	5/494	30/23174	0.000395652	0.00201935	0.00106126	22062/22632/606496/19211/13052	5
Biological process	GO:0035966	response to topologically incorrect protein	10/494	127/23174	0.000400218	0.00203828	0.0010712	12028/14828/15499/110213/224727/15519/15512/15507/78284/18708	10
Biological process	GO:0002685	regulation of leukocyte migration	13/494	201/23174	0.000400644	0.00203828	0.0010712	13614/21803/11651/26416/22059/17311/83964/19242/11634/12317/12520/18795/19229	13
Biological process	GO:0043112	receptor metabolic process	13/494	201/23174	0.000400644	0.00203828	0.0010712	13614/21803/21926/12568/18222/233489/23969/433759/77116/12520/22259/93742/211323	13
Biological process	GO:1904062	regulation of cation transmembrane transport	18/494	340/23174	0.000405301	0.00205978	0.0010825	109676/19017/108058/16867/21803/12288/11350/12028/100986/22218/15194/14360/15512/56746/18795/19211/19417/19229	18
Biological process	GO:1903727	positive regulation of phospholipid metabolic process	6/494	46/23174	0.000413763	0.00210054	0.00110392	21803/18591/20779/12540/12520/19229	6
Biological process	GO:0038127	ERBB signaling pathway	9/494	105/23174	0.000415692	0.00210361	0.00110554	21803/11651/11350/26413/20779/12402/13649/13982/19229	9
Biological process	GO:0055006	cardiac cell development	9/494	105/23174	0.000415692	0.00210361	0.00110554	108058/11548/13614/22632/56637/77579/606496/16905/13052	9
Biological process	GO:1903844	regulation of cellular response to transforming growth factor beta stimulus	9/494	105/23174	0.000415692	0.00210361	0.00110554	19042/21803/22059/20869/386655/14828/69260/17126/12633	9
Biological process	GO:0010676	positive regulation of cellular carbohydrate metabolic process	7/494	64/23174	0.000417084	0.00210618	0.00110689	16867/11548/11651/80915/20869/20779/17171	7
Biological process	GO:0042306	regulation of protein import into nucleus	7/494	64/23174	0.000417084	0.00210618	0.00110689	21803/26416/26413/230908/21849/13605/18708	7
Biological process	GO:0035195	gene silencing by miRNA	10/494	128/23174	0.000426035	0.00214911	0.00112945	83557/21803/22059/15568/13649/13982/26395/98558/76850/18033	10
Biological process	GO:0050866	negative regulation of cell activation	13/494	203/23174	0.000440315	0.0022188	0.00116607	21803/26362/18591/225160/17120/17289/22174/12578/11920/12053/12801/22259/12802	13
Biological process	GO:0009952	anterior/posterior pattern specification	14/494	230/23174	0.00044894	0.00225987	0.00118766	235320/22632/22059/17701/19763/29871/15194/17126/11920/19378/20878/17702/16848/18119	14
Biological process	GO:0060425	lung morphogenesis	7/494	65/23174	0.000458966	0.0023079	0.0012129	30957/21926/26413/12540/15901/26395/18119	7
Biological process	GO:0001832	blastocyst growth	5/494	31/23174	0.000463546	0.00232847	0.00122371	57261/20586/12649/76044/12190	5
Biological process	GO:0002639	positive regulation of immunoglobulin production	6/494	47/23174	0.000465878	0.00233037	0.00122471	21803/18861/17350/17685/71890/74131	6
Biological process	GO:0030520	intracellular estrogen receptor signaling pathway	6/494	47/23174	0.000465878	0.00233037	0.00122471	12189/20779/11835/13982/381022/22061	6
Biological process	GO:0045429	positive regulation of nitric oxide biosynthetic process	6/494	47/23174	0.000465878	0.00233037	0.00122471	11651/21926/26420/13982/15519/19229	6
Biological process	GO:0048010	vascular endothelial growth factor receptor signaling pathway	6/494	47/23174	0.000465878	0.00233037	0.00122471	14180/26416/18591/15507/17164/19229	6
Biological process	GO:0038061	NIK/NF-kappaB signaling	9/494	107/23174	0.000477793	0.00238746	0.00125471	19042/13614/11651/103583/21926/13649/12317/108679/17171	9
Biological process	GO:0072503	cellular divalent inorganic cation homeostasis	23/494	498/23174	0.000481282	0.00240238	0.00126255	114875/109676/108058/16867/11548/13614/21803/12288/11350/12028/16438/13982/15194/14360/14748/110213/227059/56746/12801/18173/18795/19229/19217	23
Biological process	GO:0030177	positive regulation of Wnt signaling pathway	10/494	130/23174	0.000481834	0.00240262	0.00126268	19042/14180/11350/20779/13649/13205/20586/12316/22210/18033	10
Biological process	GO:0006402	mRNA catabolic process	13/494	205/23174	0.000483271	0.00240726	0.00126512	13164/15568/230908/18983/17350/11920/18173/17164/14573/76850/378430/53422/22057	13
Biological process	GO:0032872	regulation of stress-activated MAPK cascade	14/494	232/23174	0.000489425	0.0024316	0.00127791	22062/13614/30957/11651/21926/26413/12540/26420/13649/18472/26395/14125/18795/19229	14
Biological process	GO:0001833	inner cell mass cell proliferation	4/494	18/23174	0.000492238	0.0024316	0.00127791	57261/12649/76044/12190	4
Biological process	GO:0016584	nucleosome positioning	4/494	18/23174	0.000492238	0.0024316	0.00127791	13018/213389/171506/107970	4
Biological process	GO:0033574	response to testosterone	4/494	18/23174	0.000492238	0.0024316	0.00127791	12567/11835/15499/12633	4
Biological process	GO:0051444	negative regulation of ubiquitin-protein transferase activity	4/494	18/23174	0.000492238	0.0024316	0.00127791	11350/12578/71890/67141	4
Biological process	GO:0070935	3'-UTR-mediated mRNA stabilization	4/494	18/23174	0.000492238	0.0024316	0.00127791	13164/15568/230908/17164	4
Biological process	GO:0071801	regulation of podosome assembly	4/494	18/23174	0.000492238	0.0024316	0.00127791	21926/20779/26420/13196	4
Biological process	GO:2000641	regulation of early endosome to late endosome transport	4/494	18/23174	0.000492238	0.0024316	0.00127791	26413/20779/26395/77116	4
Biological process	GO:0052547	regulation of peptidase activity	20/494	406/23174	0.000497978	0.00245741	0.00129148	11651/26416/21926/110651/20779/12028/233489/26420/15194/433759/14360/15499/13205/12578/11799/12633/18119/22061/213945/16912	20
Biological process	GO:0034765	regulation of ion transmembrane transport	22/494	468/23174	0.000501322	0.00247135	0.0012988	109676/19017/108058/16867/21803/12288/11651/12724/21926/11350/12028/100986/22218/15194/14360/15512/56746/18795/19211/19417/19229/18000	22
Biological process	GO:0002237	response to molecule of bacterial origin	19/494	376/23174	0.000501891	0.00247161	0.00129893	21803/11651/12567/26362/26416/21926/11350/16476/26413/110651/19401/15499/12801/18173/17164/22259/12802/18033/19217	19
Biological process	GO:0050792	regulation of viral process	12/494	180/23174	0.000505718	0.00248693	0.00130699	21926/16476/20683/230908/18983/433759/13205/17535/20586/21849/100038882/94244	12
Biological process	GO:1902115	regulation of organelle assembly	13/494	206/23174	0.000506047	0.00248693	0.00130699	13614/110147/21926/20779/18222/26420/13196/15194/216846/76123/18817/105787/20843	13
Biological process	GO:0034249	negative regulation of cellular amide metabolic process	11/494	155/23174	0.000508478	0.00249631	0.00131192	83557/19401/18983/13205/12317/74203/12877/76850/378430/53422/22057	11
Biological process	GO:0030316	osteoclast differentiation	9/494	108/23174	0.000511587	0.00250899	0.00131858	21803/26416/21926/20779/56637/18472/12520/14308/18708	9
Biological process	GO:0007611	learning or memory	16/494	289/23174	0.000517092	0.00253338	0.0013314	11548/12288/110147/16476/12568/233489/13649/19242/53418/18472/15194/16590/12801/18795/19211/16875	16
Biological process	GO:0051972	regulation of telomerase activity	6/494	48/23174	0.000522967	0.00255167	0.00134101	26413/22059/20779/20877/15519/18005	6
Biological process	GO:0090311	regulation of protein deacetylation	6/494	48/23174	0.000522967	0.00255167	0.00134101	71175/21803/22059/69260/105787/12053	6
Biological process	GO:1904407	positive regulation of nitric oxide metabolic process	6/494	48/23174	0.000522967	0.00255167	0.00134101	11651/21926/26420/13982/15519/19229	6
Biological process	GO:2000725	regulation of cardiac muscle cell differentiation	6/494	48/23174	0.000522967	0.00255167	0.00134101	13614/21803/22632/56637/606496/211323	6
Biological process	GO:0070302	regulation of stress-activated protein kinase signaling cascade	14/494	234/23174	0.000532977	0.00259785	0.00136528	22062/13614/30957/11651/21926/26413/12540/26420/13649/18472/26395/14125/18795/19229	14
Biological process	GO:0006694	steroid biosynthetic process	11/494	156/23174	0.000536788	0.00261121	0.0013723	19017/13121/16867/12724/21926/13363/11614/105787/22417/14308/18033	11
Biological process	GO:0030100	regulation of endocytosis	16/494	290/23174	0.000536813	0.00261121	0.0013723	21803/26362/21926/20779/228998/18222/233489/12402/17289/23969/77116/12317/18173/22259/19211/93742	16
Biological process	GO:0031110	regulation of microtubule polymerization or depolymerization	8/494	87/23174	0.00053951	0.00261797	0.00137586	17755/11350/12576/66140/66468/219114/16765/74187	8
Biological process	GO:0051150	regulation of smooth muscle cell differentiation	5/494	32/23174	0.00053985	0.00261797	0.00137586	21803/14180/18591/81702/16590	5
Biological process	GO:1901976	regulation of cell cycle checkpoint	5/494	32/23174	0.00053985	0.00261797	0.00137586	225160/99375/18004/67052/268697	5
Biological process	GO:1901615	organic hydroxy compound metabolic process	22/494	471/23174	0.000545904	0.00264464	0.00138987	114875/13121/16867/12724/21926/22059/232174/16330/15194/77116/16590/16833/105787/12359/16890/22417/16591/18795/19211/19229/17171/18033	22
Biological process	GO:0060688	regulation of morphogenesis of a branching structure	7/494	67/23174	0.000552773	0.0026752	0.00140593	21803/21926/11350/11835/13982/14573/20181	7
Biological process	GO:0002695	negative regulation of leukocyte activation	12/494	182/23174	0.00055819	0.00269867	0.00141827	21803/26362/225160/17120/17289/22174/12578/11920/12053/12801/22259/12802	12
Biological process	GO:0045785	positive regulation of cell adhesion	20/494	410/23174	0.000563074	0.00271953	0.00142923	21803/235320/21926/17863/11350/20779/56637/19401/19242/11920/12317/12144/15519/12053/22417/12520/22324/19229/74131/18119	20
Biological process	GO:0006401	RNA catabolic process	14/494	236/23174	0.000579781	0.00279739	0.00147015	83557/13164/15568/230908/18983/17350/11920/18173/17164/14573/76850/378430/53422/22057	14
Biological process	GO:1903008	organelle disassembly	8/494	88/23174	0.000582597	0.00280813	0.00147579	22059/15194/22367/606496/99412/12578/12534/67588	8
Biological process	GO:0001776	leukocyte homeostasis	9/494	110/23174	0.000585067	0.00281645	0.00148017	21803/11651/26362/11350/12028/17311/83964/17289/14605	9
Biological process	GO:0010770	positive regulation of cell morphogenesis involved in differentiation	12/494	183/23174	0.000586096	0.00281645	0.00148017	17755/11350/20869/56637/18222/233489/26420/18472/99412/26395/12317/211323	12
Biological process	GO:2001235	positive regulation of apoptotic signaling pathway	12/494	183/23174	0.000586096	0.00281645	0.00148017	22062/22059/12028/56637/26420/17701/606496/20437/59004/22187/19211/22061	12
Biological process	GO:2001244	positive regulation of intrinsic apoptotic signaling pathway	7/494	68/23174	0.000605069	0.0029047	0.00152654	22062/22059/12028/17701/20437/59004/22187	7
Biological process	GO:0019935	cyclic-nucleotide-mediated signaling	13/494	210/23174	0.000606461	0.00290845	0.00152851	381489/16867/11548/18159/606496/230103/14748/16336/19229/54611/56508/22210/19217	13
Biological process	GO:0046886	positive regulation of hormone biosynthetic process	4/494	19/23174	0.000613056	0.00293417	0.00154203	19017/16867/21926/22417	4
Biological process	GO:2000104	negative regulation of DNA-dependent DNA replication	4/494	19/23174	0.000613056	0.00293417	0.00154203	17535/67141/12190/20843	4
Biological process	GO:0043434	response to peptide hormone	17/494	323/23174	0.000621046	0.00296943	0.00156056	16867/11651/12567/20779/56637/20683/606496/15499/12566/50933/12877/105787/16591/18795/19211/18708/18033	17
Biological process	GO:0060740	prostate gland epithelium morphogenesis	5/494	33/23174	0.000625213	0.00298337	0.00156789	11835/13982/15904/20181/22061	5
Biological process	GO:0071539	protein localization to centrosome	5/494	33/23174	0.000625213	0.00298337	0.00156789	56637/15194/244329/17997/20878	5
Biological process	GO:0032526	response to retinoic acid	8/494	89/23174	0.000628421	0.00299269	0.00157279	19401/232174/11920/19378/73614/20899/19229/20181	8
Biological process	GO:0070301	cellular response to hydrogen peroxide	8/494	89/23174	0.000628421	0.00299269	0.00157279	26362/11350/22059/20779/23939/15499/12578/13605	8
Biological process	GO:1904064	positive regulation of cation transmembrane transport	11/494	159/23174	0.000629731	0.00299593	0.00157449	109676/16867/12288/11350/12028/100986/22218/15194/15512/56746/18795	11
Biological process	GO:0007405	neuroblast proliferation	7/494	69/23174	0.000661218	0.00313635	0.00164828	21803/22059/18222/19242/18472/15904/12316	7
Biological process	GO:1904589	regulation of protein import	7/494	69/23174	0.000661218	0.00313635	0.00164828	21803/26416/26413/230908/21849/13605/18708	7
Biological process	GO:2000107	negative regulation of leukocyte apoptotic process	7/494	69/23174	0.000661218	0.00313635	0.00164828	26362/17311/17289/227059/14605/20877/12144	7
Biological process	GO:0043433	negative regulation of DNA-binding transcription factor activity	11/494	160/23174	0.000663541	0.00314424	0.00165243	23957/22218/13982/15901/11614/12578/59004/71890/21335/12359/17702	11
Biological process	GO:0008015	blood circulation	22/494	479/23174	0.000682072	0.00322883	0.00169689	109676/108058/11548/13614/21803/12288/11651/18591/21926/12540/13649/11835/22218/18159/606496/26395/16591/12801/18708/54611/13052/19217	22
Biological process	GO:0060560	developmental growth involved in morphogenesis	15/494	268/23174	0.000684384	0.00323656	0.00170095	17755/21803/11350/20869/12568/56637/233489/13982/18472/75605/21849/15519/20878/20496/211323	15
Biological process	GO:0001952	regulation of cell-matrix adhesion	9/494	113/23174	0.000711296	0.0033605	0.00176609	11350/20779/56637/12578/12053/22417/19211/18708/19229	9
Biological process	GO:0035116	embryonic hindlimb morphogenesis	5/494	34/23174	0.000720297	0.00338818	0.00178063	235320/17701/20586/17702/22061	5
Biological process	GO:0060512	prostate gland morphogenesis	5/494	34/23174	0.000720297	0.00338818	0.00178063	11835/13982/15904/20181/22061	5
Biological process	GO:1903429	regulation of cell maturation	5/494	34/23174	0.000720297	0.00338818	0.00178063	56637/18159/230103/381759/20878	5
Biological process	GO:1905508	protein localization to microtubule organizing center	5/494	34/23174	0.000720297	0.00338818	0.00178063	56637/15194/244329/17997/20878	5
Biological process	GO:0022029	telencephalon cell migration	7/494	70/23174	0.000721418	0.00338818	0.00178063	12568/13649/18472/77053/223697/545428/211323	7
Biological process	GO:2001021	negative regulation of response to DNA damage stimulus	7/494	70/23174	0.000721418	0.00338818	0.00178063	50505/225160/13870/15499/22594/71890/67141	7
Biological process	GO:0021954	central nervous system neuron development	8/494	91/23174	0.000728795	0.00341945	0.00179707	56386/12568/56336/18472/22187/15519/19211/16875	8
Biological process	GO:0010959	regulation of metal ion transport	20/494	419/23174	0.000737056	0.00345481	0.00181565	109676/108058/16867/21803/12288/11651/18591/11350/12028/16438/100986/22218/15194/14360/110213/15512/56746/18795/19211/19229	20
Biological process	GO:0046328	regulation of JNK cascade	12/494	188/23174	0.000743827	0.00348313	0.00183053	22062/13614/30957/11651/21926/12540/26420/13649/18472/14125/18795/19229	12
Biological process	GO:0033599	regulation of mammary gland epithelial cell proliferation	4/494	20/23174	0.000753491	0.00351801	0.00184887	12028/75605/12578/12190	4
Biological process	GO:0070633	transepithelial transport	4/494	20/23174	0.000753491	0.00351801	0.00184887	13614/16438/13052/20496	4
Biological process	GO:2000678	negative regulation of transcription regulatory region DNA binding	4/494	20/23174	0.000753491	0.00351801	0.00184887	17701/20466/71890/17702	4
Biological process	GO:0010927	cellular component assembly involved in morphogenesis	9/494	114/23174	0.000757998	0.00353559	0.00185811	13614/14712/77579/15463/18472/77116/19725/22239/12633	9
Biological process	GO:0002822	regulation of adaptive immune response based on somatic recombination of immune receptors built from immunoglobulin superfamily domains	12/494	189/23174	0.00077929	0.00363136	0.00190843	21803/21926/225160/18861/17350/17685/71890/12053/18173/12520/14125/74131	12
Biological process	GO:0006476	protein deacetylation	8/494	92/23174	0.000783607	0.0036479	0.00191713	71175/21803/22059/69260/433759/20466/105787/12053	8
Biological process	GO:0045669	positive regulation of osteoblast differentiation	7/494	71/23174	0.000785874	0.00365489	0.0019208	18159/15904/67141/22417/17702/16905/22061	7
Biological process	GO:0007019	microtubule depolymerization	6/494	52/23174	0.000807596	0.0037486	0.00197005	17755/17997/228421/16765/73804/74187	6
Biological process	GO:0046902	regulation of mitochondrial membrane permeability	6/494	52/23174	0.000807596	0.0037486	0.00197005	12799/22059/12028/56637/15194/606496	6
Biological process	GO:0072089	stem cell proliferation	10/494	139/23174	0.000813436	0.00377203	0.00198237	21803/22059/17311/18222/19242/18472/15904/18044/12316/72504	10
Biological process	GO:0043122	regulation of I-kappaB kinase/NF-kappaB signaling	11/494	164/23174	0.000814271	0.00377224	0.00198247	19042/11651/21926/11350/13982/22196/433759/14360/12234/81702/15507	11
Biological process	GO:0002701	negative regulation of production of molecular mediator of immune response	5/494	35/23174	0.000825781	0.00381075	0.00200271	21803/21926/225160/110213/12053	5
Biological process	GO:0009954	proximal/distal pattern formation	5/494	35/23174	0.000825781	0.00381075	0.00200271	232174/19378/18119/22061/14632	5
Biological process	GO:0033146	regulation of intracellular estrogen receptor signaling pathway	5/494	35/23174	0.000825781	0.00381075	0.00200271	12189/20779/11835/381022/22061	5
Biological process	GO:2000171	negative regulation of dendrite development	5/494	35/23174	0.000825781	0.00381075	0.00200271	56637/13196/15901/606496/19211	5
Biological process	GO:0016575	histone deacetylation	7/494	72/23174	0.000854796	0.00394082	0.00207107	71175/21803/22059/69260/433759/20466/12053	7
Biological process	GO:0030509	BMP signaling pathway	11/494	165/23174	0.000856089	0.00394297	0.0020722	19042/11350/17701/15901/17126/12155/14566/17702/18119/12164/22057	11
Biological process	GO:0051495	positive regulation of cytoskeleton organization	13/494	218/23174	0.000858307	0.00394818	0.00207494	13614/17755/11350/12576/56378/434204/15901/54418/76123/74187/22417/21754/19229	13
Biological process	GO:0042476	odontogenesis	9/494	116/23174	0.000858905	0.00394818	0.00207494	13614/21803/20779/12028/17701/433759/17702/22061/16875	9
Biological process	GO:0002824	positive regulation of adaptive immune response based on somatic recombination of immune receptors built from immunoglobulin superfamily domains	10/494	140/23174	0.000859704	0.00394818	0.00207494	21803/21926/18861/17350/17685/71890/18173/12520/14125/74131	10
Biological process	GO:0032210	regulation of telomere maintenance via telomerase	6/494	53/23174	0.000894537	0.00409631	0.00215279	26413/20779/21750/11920/20877/18005	6
Biological process	GO:0048662	negative regulation of smooth muscle cell proliferation	6/494	53/23174	0.000894537	0.00409631	0.00215279	19017/12576/22059/13982/19211/18708	6
Biological process	GO:0070988	demethylation	6/494	53/23174	0.000894537	0.00409631	0.00215279	20592/211064/52463/75605/21849/22210	6
Biological process	GO:0051017	actin filament bundle assembly	11/494	166/23174	0.000899671	0.00411586	0.00216306	11350/20779/242687/77579/15901/54418/16765/22417/21754/18708/19229	11
Biological process	GO:0010506	regulation of autophagy	14/494	247/23174	0.000904355	0.00413333	0.00217224	11651/110147/50505/22059/20869/56637/15194/606496/99412/26395/11920/67773/105787/67588	14
Biological process	GO:0050680	negative regulation of epithelial cell proliferation	10/494	141/23174	0.000908112	0.00414652	0.00217917	21803/21926/12576/20869/13039/11835/19242/12578/12190/19211	10
Biological process	GO:0007005	mitochondrion organization	21/494	458/23174	0.000914945	0.00415903	0.00218575	19017/12799/22062/11651/16476/22059/12568/12028/15525/56637/26420/66706/15194/606496/12578/15519/105787/67588/16905/67269/13052	21
Biological process	GO:0002863	positive regulation of inflammatory response to antigenic stimulus	4/494	21/23174	0.000915213	0.00415903	0.00218575	21926/12801/12520/14125	4
Biological process	GO:0007095	mitotic G2 DNA damage checkpoint	4/494	21/23174	0.000915213	0.00415903	0.00218575	17535/11920/12144/12534	4
Biological process	GO:0022010	central nervous system myelination	4/494	21/23174	0.000915213	0.00415903	0.00218575	56386/56336/15904/19211	4
Biological process	GO:0032291	axon ensheathment in central nervous system	4/494	21/23174	0.000915213	0.00415903	0.00218575	56386/56336/15904/19211	4
Biological process	GO:0055074	calcium ion homeostasis	22/494	490/23174	0.000916903	0.00416274	0.0021877	114875/109676/108058/16867/11548/13614/21803/12288/11350/12028/16438/13982/15194/14360/14748/110213/56746/16591/12801/18795/19229/19217	22
Biological process	GO:0051145	smooth muscle cell differentiation	7/494	73/23174	0.000928398	0.00420691	0.00221091	21803/14180/18591/81702/16590/20586/22417	7
Biological process	GO:0051865	protein autoubiquitination	7/494	73/23174	0.000928398	0.00420691	0.00221091	12189/58230/65255/58186/18140/67588/22210	7
Biological process	GO:0071398	cellular response to fatty acid	5/494	36/23174	0.00094236	0.00426613	0.00224203	11651/12567/105787/18795/19217	5
Biological process	GO:0050768	negative regulation of neurogenesis	17/494	336/23174	0.000960499	0.00434055	0.00228114	83557/22062/21803/22059/12568/56637/19242/13196/18472/15901/15904/606496/12317/12316/74203/19211/211323	17
Biological process	GO:0032535	regulation of cellular component size	19/494	397/23174	0.00096062	0.00434055	0.00228114	22062/13614/17755/11651/12567/11350/12568/56637/233489/56378/434204/18472/54418/15519/19211/19229/67605/20496/211323	19
Biological process	GO:0007173	epidermal growth factor receptor signaling pathway	8/494	95/23174	0.000968196	0.00437063	0.00229696	21803/11651/11350/20779/12402/13649/13982/19229	8
Biological process	GO:0031929	TOR signaling	9/494	118/23174	0.000970467	0.00437674	0.00230017	83557/20869/56637/224826/606496/227743/11920/105787/67605	9
Biological process	GO:0046651	lymphocyte proliferation	16/494	307/23174	0.000984982	0.004438	0.00233236	21803/11350/22059/12028/17120/14360/12578/227059/11920/15201/12144/12053/22417/18173/12520/74131	16
Biological process	GO:0051568	histone H3-K4 methylation	6/494	54/23174	0.000988509	0.00444969	0.0023385	12189/110147/17863/13436/381022/664799	6
Biological process	GO:0031589	cell-substrate adhesion	17/494	337/23174	0.000992148	0.00446186	0.0023449	26362/11350/20779/12568/56637/83964/19242/17289/434204/22174/12578/12317/12053/22417/19211/18708/19229	17
Biological process	GO:0010822	positive regulation of mitochondrion organization	7/494	74/23174	0.0010069	0.00452394	0.00237752	19017/22059/12028/56637/15194/606496/105787	7
Biological process	GO:0045216	cell-cell junction organization	10/494	143/23174	0.00101164	0.00454097	0.00238647	21803/12558/21926/14712/18747/22239/13605/14619/13052/93742	10
Biological process	GO:0002706	regulation of lymphocyte mediated immunity	12/494	195/23174	0.00102304	0.00457356	0.0024036	21803/21926/225160/18861/17350/17685/71890/12053/12520/14125/22324/74131	12
Biological process	GO:1902905	positive regulation of supramolecular fiber organization	12/494	195/23174	0.00102304	0.00457356	0.0024036	13614/17755/11350/12576/56378/434204/15901/54418/74187/22417/21754/19229	12
Biological process	GO:0009650	UV protection	3/494	10/23174	0.0010333	0.00457356	0.0024036	50505/13870/12359	3
Biological process	GO:0031642	negative regulation of myelination	3/494	10/23174	0.0010333	0.00457356	0.0024036	21926/77116/19211	3
Biological process	GO:0032875	regulation of DNA endoreduplication	3/494	10/23174	0.0010333	0.00457356	0.0024036	17535/67141/20843	3
Biological process	GO:0032927	positive regulation of activin receptor signaling pathway	3/494	10/23174	0.0010333	0.00457356	0.0024036	14180/17126/18119	3
Biological process	GO:0043497	regulation of protein heterodimerization activity	3/494	10/23174	0.0010333	0.00457356	0.0024036	12028/12540/15499	3
Biological process	GO:0043922	negative regulation by host of viral transcription	3/494	10/23174	0.0010333	0.00457356	0.0024036	16476/230908/433759	3
Biological process	GO:0045759	negative regulation of action potential	3/494	10/23174	0.0010333	0.00457356	0.0024036	22218/12801/12802	3
Biological process	GO:0051001	negative regulation of nitric-oxide synthase activity	3/494	10/23174	0.0010333	0.00457356	0.0024036	56637/12801/12802	3
Biological process	GO:0060020	Bergmann glial cell differentiation	3/494	10/23174	0.0010333	0.00457356	0.0024036	11350/26413/26395	3
Biological process	GO:1901724	positive regulation of cell proliferation involved in kidney development	3/494	10/23174	0.0010333	0.00457356	0.0024036	83557/18591/12633	3
Biological process	GO:1904667	negative regulation of ubiquitin protein ligase activity	3/494	10/23174	0.0010333	0.00457356	0.0024036	12578/71890/67141	3
Biological process	GO:2000347	positive regulation of hepatocyte proliferation	3/494	10/23174	0.0010333	0.00457356	0.0024036	16438/19242/12633	3
Biological process	GO:2000807	regulation of synaptic vesicle clustering	3/494	10/23174	0.0010333	0.00457356	0.0024036	12558/233489/19211	3
Biological process	GO:0061572	actin filament bundle organization	11/494	169/23174	0.00104157	0.00460589	0.00242059	11350/20779/242687/77579/15901/54418/16765/22417/21754/18708/19229	11
Biological process	GO:0032943	mononuclear cell proliferation	16/494	309/23174	0.00105422	0.00465752	0.00244773	21803/11350/22059/12028/17120/14360/12578/227059/11920/15201/12144/12053/22417/18173/12520/74131	16
Biological process	GO:0070482	response to oxygen levels	15/494	280/23174	0.0010664	0.00470057	0.00247035	108058/13614/11651/22059/16438/54418/26395/110213/11920/20937/64707/21335/12877/12359/19211	15
Biological process	GO:0002708	positive regulation of lymphocyte mediated immunity	10/494	144/23174	0.00106692	0.00470057	0.00247035	21803/21926/18861/17350/17685/71890/12520/14125/22324/74131	10
Biological process	GO:0018393	internal peptidyl-lysine acetylation	10/494	144/23174	0.00106692	0.00470057	0.00247035	12189/21803/57261/13018/224727/67773/20586/20466/12649/12190	10
Biological process	GO:0014003	oligodendrocyte development	5/494	37/23174	0.00107074	0.00470868	0.00247462	56386/21803/56336/15904/19211	5
Biological process	GO:0021799	cerebral cortex radially oriented cell migration	5/494	37/23174	0.00107074	0.00470868	0.00247462	12568/18472/77053/223697/545428	5
Biological process	GO:0021795	cerebral cortex cell migration	6/494	55/23174	0.00108988	0.00477369	0.00250878	12568/13649/18472/77053/223697/545428	6
Biological process	GO:0046513	ceramide biosynthetic process	6/494	55/23174	0.00108988	0.00477369	0.00250878	56386/53897/57370/56336/13244/14421	6
Biological process	GO:0006066	alcohol metabolic process	16/494	310/23174	0.00109036	0.00477369	0.00250878	114875/13121/16867/12724/21926/16330/77116/105787/12359/16890/22417/18795/19211/19229/17171/18033	16
Biological process	GO:0008625	extrinsic apoptotic signaling pathway via death domain receptors	7/494	75/23174	0.00109053	0.00477369	0.00250878	12189/21926/12028/13205/12633/19211/18708	7
Biological process	GO:0032507	maintenance of protein location in cell	7/494	75/23174	0.00109053	0.00477369	0.00250878	21402/76407/11651/12568/14828/77053/223697	7
Biological process	GO:0008286	insulin receptor signaling pathway	9/494	120/23174	0.0010935	0.00477793	0.00251101	11651/12567/20779/56637/606496/105787/16591/18795/18708	9
Biological process	GO:0036294	cellular response to decreased oxygen levels	9/494	120/23174	0.0010935	0.00477793	0.00251101	11651/22059/54418/26395/110213/20937/64707/12877/19211	9
Biological process	GO:0034405	response to fluid shear stress	4/494	22/23174	0.00109989	0.00479707	0.00252107	11651/20779/23939/19229	4
Biological process	GO:0071800	podosome assembly	4/494	22/23174	0.00109989	0.00479707	0.00252107	21926/20779/26420/13196	4
Biological process	GO:0007006	mitochondrial membrane organization	8/494	97/23174	0.00110949	0.00482127	0.00253378	12799/22059/12028/15525/56637/15194/606496/15519	8
Biological process	GO:0010595	positive regulation of endothelial cell migration	8/494	97/23174	0.00110949	0.00482127	0.00253378	21803/11651/18591/11350/20683/12317/15507/19229	8
Biological process	GO:0035967	cellular response to topologically incorrect protein	8/494	97/23174	0.00110949	0.00482127	0.00253378	12028/14828/15499/110213/224727/15512/78284/18708	8
Biological process	GO:0070167	regulation of biomineral tissue development	8/494	97/23174	0.00110949	0.00482127	0.00253378	21803/19242/20937/67141/22417/16591/100038882/19229	8
Biological process	GO:0071216	cellular response to biotic stimulus	16/494	311/23174	0.00112754	0.00489525	0.00257266	21803/11651/12567/26362/26416/21926/11350/26413/22059/56637/19401/14828/71711/52864/22259/18033	16
Biological process	GO:0010632	regulation of epithelial cell migration	13/494	225/23174	0.00114567	0.00496944	0.00261165	21803/11651/18591/11350/16476/20779/20683/56218/16336/12317/15507/19211/19229	13
Biological process	GO:0030031	cell projection assembly	22/494	499/23174	0.00115809	0.0050161	0.00263618	218294/18591/11350/20779/242687/12540/66722/77579/13196/434204/13852/18004/15194/216846/110350/16590/19725/15519/229776/18000/22210/54562	22
Biological process	GO:0007030	Golgi organization	9/494	121/23174	0.00115959	0.0050161	0.00263618	26413/12540/100986/15194/22367/99412/26395/110350/12534	9
Biological process	GO:0043467	regulation of generation of precursor metabolites and energy	9/494	121/23174	0.00115959	0.0050161	0.00263618	19017/11548/11651/108099/22059/18747/12534/268697/105787	9
Biological process	GO:0032956	regulation of actin cytoskeleton organization	17/494	342/23174	0.00116404	0.00503082	0.00264391	13614/21803/11350/242687/12540/13039/83964/56378/434204/15901/54418/16765/13605/22417/21754/18708/19229	17
Biological process	GO:0009743	response to carbohydrate	12/494	198/23174	0.00116688	0.00503852	0.00264796	83557/17932/23957/18747/17126/20586/20466/11799/105787/330890/18795/18033	12
Biological process	GO:0019229	regulation of vasoconstriction	7/494	76/23174	0.00117951	0.00507467	0.00266696	11548/13614/12288/11651/18591/13649/26395	7
Biological process	GO:0034620	cellular response to unfolded protein	7/494	76/23174	0.00117951	0.00507467	0.00266696	12028/14828/15499/110213/15512/78284/18708	7
Biological process	GO:0046785	microtubule polymerization	7/494	76/23174	0.00117951	0.00507467	0.00266696	17755/11350/12576/99412/74237/16765/67141	7
Biological process	GO:0070228	regulation of lymphocyte apoptotic process	7/494	76/23174	0.00117951	0.00507467	0.00266696	22059/12028/227059/14605/20877/12144/19211	7
Biological process	GO:0070227	lymphocyte apoptotic process	8/494	98/23174	0.00118605	0.00509362	0.00267692	11651/22059/12028/227059/14605/20877/12144/19211	8
Biological process	GO:0090263	positive regulation of canonical Wnt signaling pathway	8/494	98/23174	0.00118605	0.00509362	0.00267692	19042/14180/20779/13649/13205/12316/22210/18033	8
Biological process	GO:0043536	positive regulation of blood vessel endothelial cell migration	6/494	56/23174	0.00119904	0.00514476	0.00270379	21803/11651/18591/11350/20683/15507	6
Biological process	GO:0001953	negative regulation of cell-matrix adhesion	5/494	38/23174	0.00121164	0.00517552	0.00271996	20779/12578/12053/19211/18708	5
Biological process	GO:0006284	base-excision repair	5/494	38/23174	0.00121164	0.00517552	0.00271996	59026/18970/56626/22594/15361	5
Biological process	GO:0031935	regulation of chromatin silencing	5/494	38/23174	0.00121164	0.00517552	0.00271996	52463/21849/20466/171506/107970	5
Biological process	GO:0032392	DNA geometric change	5/494	38/23174	0.00121164	0.00517552	0.00271996	22059/71567/17535/12144/19361	5
Biological process	GO:0060236	regulation of mitotic spindle organization	5/494	38/23174	0.00121164	0.00517552	0.00271996	76123/18817/72119/21335/20843	5
Biological process	GO:0006665	sphingolipid metabolic process	9/494	122/23174	0.00122886	0.00524438	0.00275615	56386/53897/57370/12028/56336/13244/16590/22239/14421	9
Biological process	GO:0001667	ameboidal-type cell migration	19/494	406/23174	0.00124709	0.00531076	0.00279103	21803/11651/18591/11350/16476/20779/17311/242687/20683/56218/18472/16590/16336/12317/15507/19211/19229/18119/14573	19
Biological process	GO:0002821	positive regulation of adaptive immune response	10/494	147/23174	0.00124776	0.00531076	0.00279103	21803/21926/18861/17350/17685/71890/18173/12520/14125/74131	10
Biological process	GO:0006475	internal protein amino acid acetylation	10/494	147/23174	0.00124776	0.00531076	0.00279103	12189/21803/57261/13018/224727/67773/20586/20466/12649/12190	10
Biological process	GO:0043902	positive regulation of multi-organism process	11/494	173/23174	0.00125902	0.00535393	0.00281372	16476/20683/11835/18983/13205/81702/20586/20878/18795/54611/94244	11
Biological process	GO:0032006	regulation of TOR signaling	8/494	99/23174	0.00126677	0.0053773	0.002826	83557/20869/56637/224826/606496/11920/105787/67605	8
Biological process	GO:0062014	negative regulation of small molecule metabolic process	8/494	99/23174	0.00126677	0.0053773	0.002826	12189/19017/21803/11651/22059/22417/12801/18033	8
Biological process	GO:0060348	bone development	13/494	228/23174	0.00129133	0.00547667	0.00287823	22059/20779/54635/242687/19401/17701/18159/232174/18472/230103/244329/16590/17702	13
Biological process	GO:0030539	male genitalia development	4/494	23/23174	0.00130921	0.00552302	0.00290258	11835/65247/104271/320558	4
Biological process	GO:0031954	positive regulation of protein autophosphorylation	4/494	23/23174	0.00130921	0.00552302	0.00290258	18591/20779/54635/17535	4
Biological process	GO:0032800	receptor biosynthetic process	4/494	23/23174	0.00130921	0.00552302	0.00290258	13614/21926/433759/22259	4
Biological process	GO:0032959	inositol trisphosphate biosynthetic process	4/494	23/23174	0.00130921	0.00552302	0.00290258	114875/16867/18795/19229	4
Biological process	GO:0050995	negative regulation of lipid catabolic process	4/494	23/23174	0.00130921	0.00552302	0.00290258	11651/21926/105787/12801	4
Biological process	GO:0051457	maintenance of protein location in nucleus	4/494	23/23174	0.00130921	0.00552302	0.00290258	21402/12568/77053/223697	4
Biological process	GO:0009247	glycolipid biosynthetic process	6/494	57/23174	0.00131637	0.00554831	0.00291588	56386/53897/57370/56336/22239/14421	6
Biological process	GO:0050770	regulation of axonogenesis	12/494	201/23174	0.0013271	0.00558859	0.00293704	17755/12558/11350/20869/12568/56637/233489/18472/99412/26395/19211/211323	12
Biological process	GO:0002702	positive regulation of production of molecular mediator of immune response	8/494	100/23174	0.0013518	0.0056876	0.00298908	21803/26416/18861/17350/17685/71890/12520/74131	8
Biological process	GO:0030521	androgen receptor signaling pathway	5/494	39/23174	0.00136578	0.00573629	0.00301467	20592/11835/433759/20586/18119	5
Biological process	GO:0097300	programmed necrotic cell death	5/494	39/23174	0.00136578	0.00573629	0.00301467	21926/22059/12028/56449/12633	5
Biological process	GO:0060562	epithelial tube morphogenesis	18/494	378/23174	0.00136832	0.0057419	0.00301762	13614/21803/21926/11350/20779/19401/11835/13982/14595/18747/75605/12234/19378/22417/17702/18119/14573/20496	18
Biological process	GO:0034332	adherens junction organization	9/494	124/23174	0.00137742	0.00577501	0.00303501	12558/11350/20779/12540/18222/434204/22417/19211/19229	9
Biological process	GO:0034767	positive regulation of ion transmembrane transport	11/494	175/23174	0.00138099	0.00578146	0.00303841	109676/16867/12288/11350/12028/100986/22218/15194/15512/56746/18795	11
Biological process	GO:0007254	JNK cascade	12/494	202/23174	0.00138438	0.00578146	0.00303841	22062/13614/30957/11651/21926/12540/26420/13649/18472/14125/18795/19229	12
Biological process	GO:0034764	positive regulation of transmembrane transport	13/494	230/23174	0.00139676	0.00578146	0.00303841	109676/16867/12288/11651/26416/11350/12028/100986/22218/15194/15512/56746/18795	13
Biological process	GO:0001574	ganglioside biosynthetic process	3/494	11/23174	0.00139837	0.00578146	0.00303841	56386/56336/14421	3
Biological process	GO:0031442	positive regulation of mRNA 3'-end processing	3/494	11/23174	0.00139837	0.00578146	0.00303841	15499/268697/12877	3
Biological process	GO:0033327	Leydig cell differentiation	3/494	11/23174	0.00139837	0.00578146	0.00303841	11835/13363/11614	3
Biological process	GO:0042023	DNA endoreduplication	3/494	11/23174	0.00139837	0.00578146	0.00303841	17535/67141/20843	3
Biological process	GO:0060056	mammary gland involution	3/494	11/23174	0.00139837	0.00578146	0.00303841	12028/14595/12578	3
Biological process	GO:0060768	regulation of epithelial cell proliferation involved in prostate gland development	3/494	11/23174	0.00139837	0.00578146	0.00303841	12576/20869/11835	3
Biological process	GO:0070601	centromeric sister chromatid cohesion	3/494	11/23174	0.00139837	0.00578146	0.00303841	72415/68549/12236	3
Biological process	GO:0086016	AV node cell action potential	3/494	11/23174	0.00139837	0.00578146	0.00303841	109676/12288/13052	3
Biological process	GO:0086027	AV node cell to bundle of His cell signaling	3/494	11/23174	0.00139837	0.00578146	0.00303841	109676/12288/13052	3
Biological process	GO:0090343	positive regulation of cell aging	3/494	11/23174	0.00139837	0.00578146	0.00303841	22059/12578/16905	3
Biological process	GO:0097421	liver regeneration	3/494	11/23174	0.00139837	0.00578146	0.00303841	16438/20878/14632	3
Biological process	GO:0098722	asymmetric stem cell division	3/494	11/23174	0.00139837	0.00578146	0.00303841	235320/69260/20899	3
Biological process	GO:1903799	negative regulation of production of miRNAs involved in gene silencing by miRNA	3/494	11/23174	0.00139837	0.00578146	0.00303841	21803/22059/13982	3
Biological process	GO:0006874	cellular calcium ion homeostasis	21/494	474/23174	0.0013999	0.00578277	0.00303909	114875/109676/108058/16867/11548/13614/21803/12288/11350/12028/16438/13982/15194/14360/14748/110213/56746/12801/18795/19229/19217	21
Biological process	GO:0043270	positive regulation of ion transport	16/494	318/23174	0.00141908	0.00585491	0.00307701	109676/16867/13614/12288/11651/18591/11350/12028/16438/26420/100986/22218/15194/15512/56746/18795	16
Biological process	GO:0002699	positive regulation of immune effector process	14/494	259/23174	0.00142105	0.00585491	0.00307701	21803/26416/21926/17863/19401/18861/17350/81702/17685/71890/12520/14125/22324/74131	14
Biological process	GO:0016064	immunoglobulin mediated immune response	14/494	259/23174	0.00142105	0.00585491	0.00307701	21803/21926/225160/70238/13870/58230/18861/17350/26909/17685/71890/12053/12520/14125	14
Biological process	GO:0050772	positive regulation of axonogenesis	8/494	101/23174	0.00144131	0.00589457	0.00309785	17755/20869/56637/233489/18472/99412/26395/211323	8
Biological process	GO:0051289	protein homotetramerization	8/494	101/23174	0.00144131	0.00589457	0.00309785	22059/16438/99412/19378/20957/12359/20181/22061	8
Biological process	GO:0110020	regulation of actomyosin structure organization	8/494	101/23174	0.00144131	0.00589457	0.00309785	13614/11350/242687/16765/13605/22417/21754/18708	8
Biological process	GO:1901222	regulation of NIK/NF-kappaB signaling	8/494	101/23174	0.00144131	0.00589457	0.00309785	19042/13614/103583/21926/13649/12317/108679/17171	8
Biological process	GO:0010656	negative regulation of muscle cell apoptotic process	6/494	58/23174	0.00144227	0.00589457	0.00309785	13614/56637/15499/12633/18708/19229	6
Biological process	GO:0031124	mRNA 3'-end processing	6/494	58/23174	0.00144227	0.00589457	0.00309785	83410/74320/15499/108062/268697/12877	6
Biological process	GO:0045806	negative regulation of endocytosis	6/494	58/23174	0.00144227	0.00589457	0.00309785	21803/233489/23969/77116/22259/19211	6
Biological process	GO:0007160	cell-matrix adhesion	12/494	203/23174	0.0014437	0.00589457	0.00309785	11350/20779/12568/56637/83964/434204/12578/12053/22417/19211/18708/19229	12
Biological process	GO:0031032	actomyosin structure organization	12/494	203/23174	0.0014437	0.00589457	0.00309785	13614/11350/20779/242687/77579/16765/13605/22417/12633/21754/18708/19229	12
Biological process	GO:0048813	dendrite morphogenesis	11/494	176/23174	0.00144551	0.00589457	0.00309785	20869/12568/56637/12540/18222/233489/19242/18472/15901/14360/19211	11
Biological process	GO:0071772	response to BMP	11/494	176/23174	0.00144551	0.00589457	0.00309785	19042/11350/17701/15901/17126/12155/14566/17702/18119/12164/22057	11
Biological process	GO:0071773	cellular response to BMP stimulus	11/494	176/23174	0.00144551	0.00589457	0.00309785	19042/11350/17701/15901/17126/12155/14566/17702/18119/12164/22057	11
Biological process	GO:0071322	cellular response to carbohydrate stimulus	10/494	150/23174	0.00145283	0.00591935	0.00311087	83557/17932/18747/20586/20466/11799/105787/330890/18795/18033	10
Biological process	GO:0002761	regulation of myeloid leukocyte differentiation	9/494	125/23174	0.00145695	0.00592599	0.00311436	21803/21926/16476/56637/17311/19401/99375/14308/18708	9
Biological process	GO:0010565	regulation of cellular ketone metabolic process	9/494	125/23174	0.00145695	0.00592599	0.00311436	12189/19017/11651/12724/108099/26420/22417/12801/22259	9
Biological process	GO:0051881	regulation of mitochondrial membrane potential	7/494	79/23174	0.00148097	0.00601344	0.00316032	11651/20779/12028/56637/15194/12578/22187	7
Biological process	GO:1902117	positive regulation of organelle assembly	7/494	79/23174	0.00148097	0.00601344	0.00316032	13614/21926/20779/26420/13196/15194/76123	7
Biological process	GO:0034105	positive regulation of tissue remodeling	5/494	40/23174	0.00153392	0.00620928	0.00326324	12028/13649/14595/12578/14308	5
Biological process	GO:0046825	regulation of protein export from nucleus	5/494	40/23174	0.00153392	0.00620928	0.00326324	19042/12568/56637/18747/12578	5
Biological process	GO:0002367	cytokine production involved in immune response	8/494	102/23174	0.00153545	0.00620928	0.00326324	21803/26416/21926/16590/12053/18173/12520/74131	8
Biological process	GO:1905477	positive regulation of protein localization to membrane	8/494	102/23174	0.00153545	0.00620928	0.00326324	21803/11651/21926/12568/13649/19242/14360/12520	8
Biological process	GO:0010469	regulation of signaling receptor activity	9/494	126/23174	0.00154012	0.00620928	0.00326324	19017/20779/12402/22196/76044/19211/14308/19417/19229	9
Biological process	GO:0009048	dosage compensation by inactivation of X chromosome	4/494	24/23174	0.00154483	0.00620928	0.00326324	12189/22768/13436/13018	4
Biological process	GO:0032352	positive regulation of hormone metabolic process	4/494	24/23174	0.00154483	0.00620928	0.00326324	19017/16867/21926/22417	4
Biological process	GO:0033233	regulation of protein sumoylation	4/494	24/23174	0.00154483	0.00620928	0.00326324	170930/22196/12578/59004	4
Biological process	GO:0043486	histone exchange	4/494	24/23174	0.00154483	0.00620928	0.00326324	58230/57749/20962/68231	4
Biological process	GO:0071392	cellular response to estradiol stimulus	4/494	24/23174	0.00154483	0.00620928	0.00326324	13649/13982/15499/17702	4
Biological process	GO:0097150	neuronal stem cell population maintenance	4/494	24/23174	0.00154483	0.00620928	0.00326324	12558/211651/244329/12316	4
Biological process	GO:1901984	negative regulation of protein acetylation	4/494	24/23174	0.00154483	0.00620928	0.00326324	12189/56637/433759/20466	4
Biological process	GO:0002819	regulation of adaptive immune response	12/494	205/23174	0.00156863	0.00629431	0.00330793	21803/21926/225160/18861/17350/17685/71890/12053/18173/12520/14125/74131	12
Biological process	GO:0042098	T cell proliferation	12/494	205/23174	0.00156863	0.00629431	0.00330793	21803/11350/22059/12028/17120/14360/12578/12144/22417/18173/12520/74131	12
Biological process	GO:0019724	B cell mediated immunity	14/494	262/23174	0.00158306	0.0063469	0.00333557	21803/21926/225160/70238/13870/58230/18861/17350/26909/17685/71890/12053/12520/14125	14
Biological process	GO:0055001	muscle cell development	12/494	206/23174	0.00163435	0.00651985	0.00342646	109676/108058/11548/13614/22632/56637/77579/606496/22223/12633/16905/13052	12
Biological process	GO:0017015	regulation of transforming growth factor beta receptor signaling pathway	8/494	103/23174	0.00163441	0.00651985	0.00342646	19042/21803/22059/20869/386655/14828/69260/17126	8
Biological process	GO:0035601	protein deacylation	8/494	103/23174	0.00163441	0.00651985	0.00342646	71175/21803/22059/69260/433759/20466/105787/12053	8
Biological process	GO:0043255	regulation of carbohydrate biosynthetic process	8/494	103/23174	0.00163441	0.00651985	0.00342646	16867/21803/11651/18591/20869/19229/17171/18033	8
Biological process	GO:0098732	macromolecule deacylation	8/494	103/23174	0.00163441	0.00651985	0.00342646	71175/21803/22059/69260/433759/20466/105787/12053	8
Biological process	GO:1903426	regulation of reactive oxygen species biosynthetic process	8/494	103/23174	0.00163441	0.00651985	0.00342646	11651/21926/26420/13982/14360/15519/12633/19229	8
Biological process	GO:0010675	regulation of cellular carbohydrate metabolic process	10/494	153/23174	0.00168448	0.00671398	0.00352848	19017/16867/11548/11651/80915/22059/20869/20779/19229/17171	10
Biological process	GO:0043279	response to alkaloid	7/494	81/23174	0.00171314	0.00679161	0.00356928	11548/110147/12568/12144/19361/105787/12801	7
Biological process	GO:0007431	salivary gland development	5/494	41/23174	0.00171678	0.00679161	0.00356928	12724/18591/21926/13649/18970	5
Biological process	GO:0021955	central nervous system neuron axonogenesis	5/494	41/23174	0.00171678	0.00679161	0.00356928	56386/56336/18472/15519/19211	5
Biological process	GO:0038083	peptidyl-tyrosine autophosphorylation	5/494	41/23174	0.00171678	0.00679161	0.00356928	11350/20779/13649/14360/19229	5
Biological process	GO:0046782	regulation of viral transcription	5/494	41/23174	0.00171678	0.00679161	0.00356928	16476/20683/230908/433759/20586	5
Biological process	GO:0051281	positive regulation of release of sequestered calcium ion into cytosol	5/494	41/23174	0.00171678	0.00679161	0.00356928	16867/11350/12028/15194/56746	5
Biological process	GO:0055026	negative regulation of cardiac muscle tissue development	5/494	41/23174	0.00171678	0.00679161	0.00356928	22062/22632/606496/19211/13052	5
Biological process	GO:1903580	positive regulation of ATP metabolic process	5/494	41/23174	0.00171678	0.00679161	0.00356928	19017/26395/12534/268697/105787	5
Biological process	GO:2000279	negative regulation of DNA biosynthetic process	5/494	41/23174	0.00171678	0.00679161	0.00356928	22059/20779/21750/18159/12649	5
Biological process	GO:0090183	regulation of kidney development	6/494	60/23174	0.00172137	0.00680414	0.00357587	83557/21803/18591/22417/12633/14573	6
Biological process	GO:0030038	contractile actin filament bundle assembly	8/494	104/23174	0.00173834	0.00685414	0.00360215	11350/20779/242687/16765/22417/21754/18708/19229	8
Biological process	GO:0043149	stress fiber assembly	8/494	104/23174	0.00173834	0.00685414	0.00360215	11350/20779/242687/16765/22417/21754/18708/19229	8
Biological process	GO:0046634	regulation of alpha-beta T cell activation	8/494	104/23174	0.00173834	0.00685414	0.00360215	21803/235320/17863/19401/12144/12053/12520/74131	8
Biological process	GO:0050727	regulation of inflammatory response	17/494	356/23174	0.00178531	0.00703351	0.00369641	26416/21926/13649/13982/22174/211651/14087/244329/11920/12053/12801/12520/14125/22259/17171/12802/18033	17
Biological process	GO:0016331	morphogenesis of embryonic epithelium	11/494	181/23174	0.00180628	0.00708938	0.00372578	21803/11350/19401/11835/18747/15194/19378/22417/18119/14573/22061	11
Biological process	GO:0021801	cerebral cortex radial glia guided migration	4/494	25/23174	0.00180841	0.00708938	0.00372578	12568/18472/77053/223697	4
Biological process	GO:0022030	telencephalon glial cell migration	4/494	25/23174	0.00180841	0.00708938	0.00372578	12568/18472/77053/223697	4
Biological process	GO:0032469	endoplasmic reticulum calcium ion homeostasis	4/494	25/23174	0.00180841	0.00708938	0.00372578	108058/12028/16438/110213	4
Biological process	GO:1903649	regulation of cytoplasmic transport	4/494	25/23174	0.00180841	0.00708938	0.00372578	26413/20779/26395/77116	4
Biological process	GO:1904357	negative regulation of telomere maintenance via telomere lengthening	4/494	25/23174	0.00180841	0.00708938	0.00372578	50505/20779/21750/52864	4
Biological process	GO:1903522	regulation of blood circulation	13/494	237/23174	0.00182369	0.00714341	0.00375417	109676/11548/13614/12288/11651/18591/13649/22218/606496/26395/18708/13052/19217	13
Biological process	GO:0007100	mitotic centrosome separation	3/494	12/23174	0.00183511	0.00714704	0.00375608	12649/18005/20878	3
Biological process	GO:0034088	maintenance of mitotic sister chromatid cohesion	3/494	12/23174	0.00183511	0.00714704	0.00375608	71175/22589/226026	3
Biological process	GO:0051988	regulation of attachment of spindle microtubules to kinetochore	3/494	12/23174	0.00183511	0.00714704	0.00375608	13605/268697/18005	3
Biological process	GO:0060525	prostate glandular acinus development	3/494	12/23174	0.00183511	0.00714704	0.00375608	13982/20181/22061	3
Biological process	GO:0060767	epithelial cell proliferation involved in prostate gland development	3/494	12/23174	0.00183511	0.00714704	0.00375608	12576/20869/11835	3
Biological process	GO:1902510	regulation of apoptotic DNA fragmentation	3/494	12/23174	0.00183511	0.00714704	0.00375608	12028/15499/12578	3
Biological process	GO:2000105	positive regulation of DNA-dependent DNA replication	3/494	12/23174	0.00183511	0.00714704	0.00375608	22589/12566/12545	3
Biological process	GO:0019722	calcium-mediated signaling	12/494	209/23174	0.00184527	0.00717155	0.00376896	109676/16867/13614/21926/56637/16438/23939/15194/105787/14125/19229/211323	12
Biological process	GO:0006413	translational initiation	8/494	105/23174	0.00184742	0.00717155	0.00376896	13164/21926/211064/19401/20218/230861/13205/20181	8
Biological process	GO:0007043	cell-cell junction assembly	8/494	105/23174	0.00184742	0.00717155	0.00376896	12558/21926/14712/18747/22239/13605/14619/93742	8
Biological process	GO:0014897	striated muscle hypertrophy	8/494	105/23174	0.00184742	0.00717155	0.00376896	108058/11548/13614/22632/56637/11835/606496/16905	8
Biological process	GO:1903428	positive regulation of reactive oxygen species biosynthetic process	6/494	61/23174	0.00187541	0.00727425	0.00382293	11651/21926/26420/13982/15519/19229	6
Biological process	GO:0051262	protein tetramerization	11/494	182/23174	0.00188657	0.00730807	0.0038407	22062/22059/16438/99412/14375/77116/19378/20957/12359/20181/22061	11
Biological process	GO:0030336	negative regulation of cell migration	14/494	267/23174	0.00188719	0.00730807	0.0038407	19017/21803/11651/18591/56637/56218/19242/12317/22417/67588/18795/19211/18119/211323	14
Biological process	GO:0045444	fat cell differentiation	13/494	238/23174	0.00189266	0.00732329	0.0038487	71175/19017/21803/235320/11861/11651/26416/21926/56637/15904/50933/18795/17702	13
Biological process	GO:0032958	inositol phosphate biosynthetic process	5/494	42/23174	0.00191513	0.00739225	0.00388495	114875/16867/18795/19229/17171	5
Biological process	GO:0046621	negative regulation of organ growth	5/494	42/23174	0.00191513	0.00739225	0.00388495	22062/22632/606496/19211/13052	5
Biological process	GO:0090224	regulation of spindle organization	5/494	42/23174	0.00191513	0.00739225	0.00388495	76123/18817/72119/21335/20843	5
Biological process	GO:0045185	maintenance of protein location	8/494	106/23174	0.00196184	0.0075664	0.00397647	21402/76407/11651/12568/14828/77053/21335/223697	8
Biological process	GO:0030595	leukocyte chemotaxis	12/494	211/23174	0.00199791	0.0076931	0.00404305	13614/26416/18591/83964/19242/16590/12317/22324/19229/12802/13052/20496	12
Biological process	GO:0042445	hormone metabolic process	12/494	211/23174	0.00199791	0.0076931	0.00404305	19017/16867/17932/12724/21926/13982/232174/15194/19378/11576/22417/18033	12
Biological process	GO:0010952	positive regulation of peptidase activity	10/494	157/23174	0.00203897	0.00783481	0.00411753	26416/21926/12028/233489/26420/14360/15499/13205/12578/18119	10
Biological process	GO:0043966	histone H3 acetylation	6/494	62/23174	0.00203965	0.00783481	0.00411753	12189/57261/20586/20466/12649/12190	6
Biological process	GO:0048008	platelet-derived growth factor receptor signaling pathway	6/494	62/23174	0.00203965	0.00783481	0.00411753	18591/11350/20779/54635/12402/19211	6
Biological process	GO:0002449	lymphocyte mediated immunity	19/494	424/23174	0.00204266	0.00784005	0.00412028	20592/21803/21926/225160/70238/13870/58230/11634/18861/17350/26909/17685/71890/12053/18173/12520/14125/22324/74131	19
Biological process	GO:0014896	muscle hypertrophy	8/494	107/23174	0.00208176	0.00797729	0.00419241	108058/11548/13614/22632/56637/11835/606496/16905	8
Biological process	GO:0030048	actin filament-based movement	8/494	107/23174	0.00208176	0.00797729	0.00419241	109676/108058/12288/242687/22218/77579/223697/93742	8
Biological process	GO:0007549	dosage compensation	4/494	26/23174	0.00210159	0.00804036	0.00422556	12189/22768/13436/13018	4
Biological process	GO:0098901	regulation of cardiac muscle cell action potential	4/494	26/23174	0.00210159	0.00804036	0.00422556	109676/108058/12288/13052	4
Biological process	GO:0006970	response to osmotic stress	7/494	84/23174	0.00211329	0.00807865	0.00424568	22059/12028/13205/14375/14605/56449/20496	7
Biological process	GO:0001508	action potential	9/494	132/23174	0.00212267	0.00810798	0.00426109	109676/108058/12288/21926/22218/12801/12802/56508/13052	9
Biological process	GO:0043044	ATP-dependent chromatin remodeling	5/494	43/23174	0.00212973	0.00812192	0.00426842	58230/20586/57749/20962/68231	5
Biological process	GO:0043277	apoptotic cell clearance	5/494	43/23174	0.00212973	0.00812192	0.00426842	26362/19401/17289/22174/22259	5
Biological process	GO:0034284	response to monosaCellular componentharide	11/494	185/23174	0.00214503	0.00817376	0.00429566	83557/17932/23957/18747/17126/20586/20466/11799/105787/330890/18795	11
Biological process	GO:0045621	positive regulation of lymphocyte differentiation	8/494	108/23174	0.00220737	0.00840459	0.00441697	21803/235320/26362/17863/19401/15519/12053/74131	8
Biological process	GO:0043388	positive regulation of DNA binding	6/494	63/23174	0.00221453	0.00841167	0.00442069	71175/21803/57261/218914/20586/21849	6
Biological process	GO:0045661	regulation of myoblast differentiation	6/494	63/23174	0.00221453	0.00841167	0.00442069	21803/26416/21926/22026/18795/18708	6
Biological process	GO:0070059	intrinsic apoptotic signaling pathway in response to endoplasmic reticulum stress	6/494	63/23174	0.00221453	0.00841167	0.00442069	22059/12028/56637/16438/110213/224727	6
Biological process	GO:1901655	cellular response to ketone	9/494	133/23174	0.00223487	0.00847863	0.00445588	21803/11651/12567/20779/11835/71702/105787/14573/19217	9
Biological process	GO:0072001	renal system development	15/494	302/23174	0.00223571	0.00847863	0.00445588	83557/21803/235320/18591/12028/19401/18004/17126/224727/19378/12359/22417/12633/14573/22061	15
Biological process	GO:0035418	protein localization to synapse	7/494	85/23174	0.00226157	0.00855628	0.00449669	30957/12568/56637/21750/26395/15507/56508	7
Biological process	GO:0051384	response to glucocorticoid	7/494	85/23174	0.00226157	0.00855628	0.00449669	21803/21926/22195/26395/18708/14573/20181	7
Biological process	GO:1903578	regulation of ATP metabolic process	7/494	85/23174	0.00226157	0.00855628	0.00449669	19017/108099/22059/26395/12534/268697/105787	7
Biological process	GO:0002638	negative regulation of immunoglobulin production	3/494	13/23174	0.00234809	0.00881366	0.00463196	225160/110213/12053	3
Biological process	GO:0006983	ER overload response	3/494	13/23174	0.00234809	0.00881366	0.00463196	22059/56637/14828	3
Biological process	GO:0031145	anaphase-promoting complex-dependent catabolic process	3/494	13/23174	0.00234809	0.00881366	0.00463196	68999/56371/107995	3
Biological process	GO:0048304	positive regulation of isotype switching to IgG isotypes	3/494	13/23174	0.00234809	0.00881366	0.00463196	18861/17350/17685	3
Biological process	GO:0051315	attachment of mitotic spindle microtubules to kinetochore	3/494	13/23174	0.00234809	0.00881366	0.00463196	17120/73804/67052	3
Biological process	GO:0071380	cellular response to prostaglandin E stimulus	3/494	13/23174	0.00234809	0.00881366	0.00463196	11651/105787/19217	3
Biological process	GO:0072711	cellular response to hydroxyurea	3/494	13/23174	0.00234809	0.00881366	0.00463196	22589/12144/19361	3
Biological process	GO:0086067	AV node cell to bundle of His cell communication	3/494	13/23174	0.00234809	0.00881366	0.00463196	109676/12288/13052	3
Biological process	GO:0099159	regulation of modification of postsynaptic structure	3/494	13/23174	0.00234809	0.00881366	0.00463196	56637/12540/77579	3
Biological process	GO:2000018	regulation of male gonad development	3/494	13/23174	0.00234809	0.00881366	0.00463196	16336/50796/22417	3
Biological process	GO:0071453	cellular response to oxygen levels	9/494	134/23174	0.00235173	0.00882039	0.0046355	11651/22059/54418/26395/110213/20937/64707/12877/19211	9
Biological process	GO:0006378	mRNA polyadenylation	5/494	44/23174	0.00236133	0.00883552	0.00464345	83410/74320/15499/108062/12877	5
Biological process	GO:0019083	viral transcription	5/494	44/23174	0.00236133	0.00883552	0.00464345	16476/20683/230908/433759/20586	5
Biological process	GO:0032881	regulation of polysaCellular componentharide metabolic process	5/494	44/23174	0.00236133	0.00883552	0.00464345	11548/21803/11651/18591/18033	5
Biological process	GO:0050863	regulation of T cell activation	15/494	304/23174	0.00238112	0.00890259	0.00467869	21803/235320/17863/11350/17120/19401/232174/211651/12578/14087/12144/15519/12053/12520/74131	15
Biological process	GO:0034605	cellular response to heat	6/494	64/23174	0.00240047	0.00895386	0.00470564	14828/22218/18747/15499/15519/15512	6
Biological process	GO:0090559	regulation of membrane permeability	6/494	64/23174	0.00240047	0.00895386	0.00470564	12799/22059/12028/56637/15194/606496	6
Biological process	GO:2000514	regulation of CD4-positive, alpha-beta T cell activation	6/494	64/23174	0.00240047	0.00895386	0.00470564	21803/17863/19401/12053/12520/74131	6
Biological process	GO:0043903	regulation of symbiosis, encompassing mutualism through parasitism	12/494	216/23174	0.00242523	0.00900681	0.00473346	21926/16476/20683/230908/18983/433759/13205/17535/20586/21849/100038882/94244	12
Biological process	GO:0010893	positive regulation of steroid biosynthetic process	4/494	27/23174	0.002426	0.00900681	0.00473346	19017/21926/22417/14308	4
Biological process	GO:0032925	regulation of activin receptor signaling pathway	4/494	27/23174	0.002426	0.00900681	0.00473346	14180/17126/50796/18119	4
Biological process	GO:0032957	inositol trisphosphate metabolic process	4/494	27/23174	0.002426	0.00900681	0.00473346	114875/16867/18795/19229	4
Biological process	GO:0051354	negative regulation of oxidoreductase activity	4/494	27/23174	0.002426	0.00900681	0.00473346	56637/12801/12802/18033	4
Biological process	GO:2000727	positive regulation of cardiac muscle cell differentiation	4/494	27/23174	0.002426	0.00900681	0.00473346	13614/21803/56637/211323	4
Biological process	GO:0019217	regulation of fatty acid metabolic process	7/494	87/23174	0.00258209	0.00956397	0.00502628	12189/19017/11651/108099/26420/12801/22259	7
Biological process	GO:0072091	regulation of stem cell proliferation	7/494	87/23174	0.00258209	0.00956397	0.00502628	21803/22059/17311/19242/18044/12316/72504	7
Biological process	GO:2000117	negative regulation of cysteine-type endopeptidase activity	7/494	87/23174	0.00258209	0.00956397	0.00502628	11651/110651/20779/15194/13205/11799/12633	7
Biological process	GO:0003015	heart process	12/494	218/23174	0.00261578	0.00968122	0.0050879	109676/108058/11548/13614/12288/20779/12540/22218/606496/14360/18708/13052	12
Biological process	GO:0042100	B cell proliferation	8/494	111/23174	0.00262022	0.0096893	0.00509214	11350/12028/12578/227059/11920/12053/12520/74131	8
Biological process	GO:0010769	regulation of cell morphogenesis involved in differentiation	16/494	338/23174	0.00262203	0.0096893	0.00509214	17755/12558/11350/20869/12568/56637/18222/233489/26420/18472/15901/99412/26395/12317/19211/211323	16
Biological process	GO:0072659	protein localization to plasma membrane	14/494	277/23174	0.00264173	0.00975453	0.00512643	109676/108058/21803/12558/11651/21926/12568/18222/233489/13649/11835/23969/12520/18708	14
Biological process	GO:0016051	carbohydrate biosynthetic process	11/494	191/23174	0.00274825	0.0101322	0.0053249	16867/21803/11651/18591/20869/56336/14595/53412/19229/17171/18033	11
Biological process	GO:0055002	striated muscle cell development	11/494	191/23174	0.00274825	0.0101322	0.0053249	108058/11548/13614/22632/56637/77579/606496/22223/12633/16905/13052	11
Biological process	GO:0006112	energy reserve metabolic process	7/494	88/23174	0.00275489	0.010141	0.00532951	11548/11651/108099/56637/606496/16591/53412	7
Biological process	GO:0051149	positive regulation of muscle cell differentiation	7/494	88/23174	0.00275489	0.010141	0.00532951	13614/21803/26416/56637/232174/16590/211323	7
Biological process	GO:0046632	alpha-beta T cell differentiation	8/494	112/23174	0.00277047	0.0101905	0.00535552	21803/235320/17863/11350/19401/12144/12053/74131	8
Biological process	GO:0045589	regulation of regulatory T cell differentiation	4/494	28/23174	0.00278323	0.0101981	0.00535952	21803/211651/14087/12053	4
Biological process	GO:0045663	positive regulation of myoblast differentiation	4/494	28/23174	0.00278323	0.0101981	0.00535952	26416/22026/18795/18708	4
Biological process	GO:0048103	somatic stem cell division	4/494	28/23174	0.00278323	0.0101981	0.00535952	18222/12578/16590/12316	4
Biological process	GO:0060765	regulation of androgen receptor signaling pathway	4/494	28/23174	0.00278323	0.0101981	0.00535952	20592/433759/20586/18119	4
Biological process	GO:1902932	positive regulation of alcohol biosynthetic process	4/494	28/23174	0.00278323	0.0101981	0.00535952	16867/21926/22417/17171	4
Biological process	GO:0006091	generation of precursor metabolites and energy	17/494	372/23174	0.00281567	0.010309	0.00541781	19017/11548/11651/108099/22059/12028/56637/18747/606496/17685/12534/268697/105787/12359/16591/53412/18597	17
Biological process	GO:0007249	I-kappaB kinase/NF-kappaB signaling	11/494	192/23174	0.00286092	0.0104666	0.00550067	19042/11651/21926/11350/13982/22196/433759/14360/12234/81702/15507	11
Biological process	GO:0043631	RNA polyadenylation	5/494	46/23174	0.00287863	0.0105072	0.00552199	83410/74320/15499/108062/12877	5
Biological process	GO:0045981	positive regulation of nucleotide metabolic process	5/494	46/23174	0.00287863	0.0105072	0.00552199	19017/26395/12534/268697/105787	5
Biological process	GO:1900544	positive regulation of purine nucleotide metabolic process	5/494	46/23174	0.00287863	0.0105072	0.00552199	19017/26395/12534/268697/105787	5
Biological process	GO:0010631	epithelial cell migration	14/494	280/23174	0.00291126	0.0106067	0.00557428	21803/11651/18591/11350/16476/20779/20683/56218/16590/16336/12317/15507/19211/19229	14
Biological process	GO:2000146	negative regulation of cell motility	14/494	280/23174	0.00291126	0.0106067	0.00557428	19017/21803/11651/18591/56637/56218/19242/12317/22417/67588/18795/19211/18119/211323	14
Biological process	GO:1904019	epithelial cell apoptotic process	8/494	113/23174	0.00292736	0.0106067	0.00557428	19017/21926/11350/56637/23939/433759/59004/12633	8
Biological process	GO:0031960	response to corticosteroid	7/494	89/23174	0.00293641	0.0106067	0.00557428	21803/21926/22195/26395/18708/14573/20181	7
Biological process	GO:1903313	positive regulation of mRNA metabolic process	7/494	89/23174	0.00293641	0.0106067	0.00557428	18983/15499/70248/268697/12877/378430/22057	7
Biological process	GO:1903524	positive regulation of blood circulation	7/494	89/23174	0.00293641	0.0106067	0.00557428	11548/13614/11651/18591/13649/606496/19217	7
Biological process	GO:1904035	regulation of epithelial cell apoptotic process	7/494	89/23174	0.00293641	0.0106067	0.00557428	19017/21926/11350/23939/433759/59004/12633	7
Biological process	GO:0010225	response to UV-C	3/494	14/23174	0.00294149	0.0106067	0.00557428	22632/22059/12190	3
Biological process	GO:0030213	hyaluronan biosynthetic process	3/494	14/23174	0.00294149	0.0106067	0.00557428	21803/18591/18033	3
Biological process	GO:0031573	intra-S DNA damage checkpoint	3/494	14/23174	0.00294149	0.0106067	0.00557428	71711/17535/17685	3
Biological process	GO:0033127	regulation of histone phosphorylation	3/494	14/23174	0.00294149	0.0106067	0.00557428	11920/268697/22210	3
Biological process	GO:0035791	platelet-derived growth factor receptor-beta signaling pathway	3/494	14/23174	0.00294149	0.0106067	0.00557428	18591/11350/20779	3
Biological process	GO:0045792	negative regulation of cell size	3/494	14/23174	0.00294149	0.0106067	0.00557428	11651/19211/67605	3
Biological process	GO:0060736	prostate gland growth	3/494	14/23174	0.00294149	0.0106067	0.00557428	11835/13982/19211	3
Biological process	GO:0072710	response to hydroxyurea	3/494	14/23174	0.00294149	0.0106067	0.00557428	22589/12144/19361	3
Biological process	GO:1905063	regulation of vascular smooth muscle cell differentiation	3/494	14/23174	0.00294149	0.0106067	0.00557428	14180/18591/16590	3
Biological process	GO:0016573	histone acetylation	9/494	139/23174	0.00301091	0.0108488	0.00570154	12189/21803/57261/13018/67773/20586/20466/12649/12190	9
Biological process	GO:0030307	positive regulation of cell growth	11/494	194/23174	0.00309744	0.0111522	0.00586095	13614/17755/11651/56637/233489/13649/18472/13205/12520/19229/211323	11
Biological process	GO:0090132	epithelium migration	14/494	282/23174	0.00310318	0.0111644	0.00586738	21803/11651/18591/11350/16476/20779/20683/56218/16590/16336/12317/15507/19211/19229	14
Biological process	GO:0040014	regulation of multicellular organism growth	7/494	90/23174	0.00312696	0.011233	0.00590343	71175/12567/18159/15499/20437/20937/102247	7
Biological process	GO:0072655	establishment of protein localization to mitochondrion	7/494	90/23174	0.00312696	0.011233	0.00590343	11651/12028/15525/606496/12578/15519/105787	7
Biological process	GO:2001239	regulation of extrinsic apoptotic signaling pathway in absence of ligand	5/494	47/23174	0.00316586	0.0113623	0.00597137	21926/12028/23939/14360/14573	5
Biological process	GO:0000731	DNA synthesis involved in DNA repair	4/494	29/23174	0.00317486	0.0113623	0.00597137	68026/20957/66654/20962	4
Biological process	GO:0006270	DNA replication initiation	4/494	29/23174	0.00317486	0.0113623	0.00597137	71567/12566/23834/66634	4
Biological process	GO:0043457	regulation of cellular respiration	4/494	29/23174	0.00317486	0.0113623	0.00597137	19017/18747/12534/268697	4
Biological process	GO:0060571	morphogenesis of an epithelial fold	4/494	29/23174	0.00317486	0.0113623	0.00597137	13649/11835/18119/22061	4
Biological process	GO:0006006	glucose metabolic process	11/494	195/23174	0.00322145	0.0115204	0.00605445	11548/11651/26416/21926/80915/22059/20869/20779/105787/18597/18708	11
Biological process	GO:0019318	hexose metabolic process	12/494	224/23174	0.00326167	0.0116363	0.00611535	11548/11651/26416/21926/80915/22059/20869/20779/14595/105787/18597/18708	12
Biological process	GO:0000187	activation of MAPK activity	8/494	115/23174	0.00326184	0.0116363	0.00611535	22062/30957/21926/26395/16590/12520/14125/17451	8
Biological process	GO:0045428	regulation of nitric oxide biosynthetic process	6/494	68/23174	0.00326362	0.0116363	0.00611535	11651/21926/26420/13982/15519/19229	6
Biological process	GO:0046637	regulation of alpha-beta T cell differentiation	6/494	68/23174	0.00326362	0.0116363	0.00611535	21803/235320/17863/19401/12053/74131	6
Biological process	GO:0090130	tissue migration	14/494	284/23174	0.00330535	0.0117762	0.00618891	21803/11651/18591/11350/16476/20779/20683/56218/16590/16336/12317/15507/19211/19229	14
Biological process	GO:0051817	modification of morphology or physiology of other organism involved in symbiotic interaction	7/494	91/23174	0.00332681	0.0118393	0.00622205	21803/16476/20683/230908/433759/20586/20181	7
Biological process	GO:0051271	negative regulation of cellular component movement	15/494	315/23174	0.00332801	0.0118393	0.00622205	19017/21803/11651/18591/12576/56637/56218/19242/12317/22417/67588/18795/19211/18119/211323	15
Biological process	GO:0034101	erythrocyte homeostasis	9/494	142/23174	0.00347141	0.012319	0.00647417	26362/26416/20683/16590/20586/76044/12053/100038882/18795	9
Biological process	GO:0010862	positive regulation of pathway-restricted SMAD protein phosphorylation	5/494	48/23174	0.00347317	0.012319	0.00647417	21803/12155/14566/18119/12164	5
Biological process	GO:0050850	positive regulation of calcium-mediated signaling	5/494	48/23174	0.00347317	0.012319	0.00647417	16867/21926/15194/14125/211323	5
Biological process	GO:0001819	positive regulation of cytokine production	19/494	445/23174	0.00347474	0.012319	0.00647417	12189/21803/26416/21926/11350/20779/26420/19401/433759/81702/15507/18173/12520/14125/17164/18795/18708/74131/18119	19
Biological process	GO:0006403	RNA localization	10/494	169/23174	0.00347579	0.012319	0.00647417	225160/22632/21750/66011/20218/15194/15499/11920/83454/12877	10
Biological process	GO:0008542	visual learning	6/494	69/23174	0.00351147	0.0124178	0.00652608	11548/12288/12568/53418/15194/16590	6
Biological process	GO:0030888	regulation of B cell proliferation	6/494	69/23174	0.00351147	0.0124178	0.00652608	12578/227059/11920/12053/12520/74131	6
Biological process	GO:0046635	positive regulation of alpha-beta T cell activation	6/494	69/23174	0.00351147	0.0124178	0.00652608	235320/17863/19401/12144/12520/74131	6
Biological process	GO:0046889	positive regulation of lipid biosynthetic process	7/494	92/23174	0.00353625	0.0124961	0.00656725	19017/11651/21926/26420/22417/22259/14308	7
Biological process	GO:0002902	regulation of B cell apoptotic process	4/494	30/23174	0.00360243	0.012639	0.00664236	12028/227059/20877/19211	4
Biological process	GO:0010390	histone monoubiquitination	4/494	30/23174	0.00360243	0.012639	0.00664236	21402/70238/19763/18140	4
Biological process	GO:0070306	lens fiber cell differentiation	4/494	30/23174	0.00360243	0.012639	0.00664236	21803/12576/56371/20586	4
Biological process	GO:1900117	regulation of execution phase of apoptosis	4/494	30/23174	0.00360243	0.012639	0.00664236	22059/12028/15499/12578	4
Biological process	GO:1902253	regulation of intrinsic apoptotic signaling pathway by p53 class mediator	4/494	30/23174	0.00360243	0.012639	0.00664236	22062/22059/17701/22187	4
Biological process	GO:0007076	mitotic chromosome condensation	3/494	15/23174	0.00361911	0.012639	0.00664236	71175/68298/230936	3
Biological process	GO:0033151	V(D)J recombination	3/494	15/23174	0.00361911	0.012639	0.00664236	18970/14375/11920	3
Biological process	GO:0046855	inositol phosphate dephosphorylation	3/494	15/23174	0.00361911	0.012639	0.00664236	16330/77116/19211	3
Biological process	GO:0051571	positive regulation of histone H3-K4 methylation	3/494	15/23174	0.00361911	0.012639	0.00664236	12189/17863/13436	3
Biological process	GO:0051645	Golgi localization	3/494	15/23174	0.00361911	0.012639	0.00664236	20869/12540/99412	3
Biological process	GO:0060742	epithelial cell differentiation involved in prostate gland development	3/494	15/23174	0.00361911	0.012639	0.00664236	11835/20181/22061	3
Biological process	GO:0061029	eyelid development in camera-type eye	3/494	15/23174	0.00361911	0.012639	0.00664236	16476/13649/433759	3
Biological process	GO:0097329	response to antimetabolite	3/494	15/23174	0.00361911	0.012639	0.00664236	22589/12144/19361	3
Biological process	GO:0098926	postsynaptic signal transduction	3/494	15/23174	0.00361911	0.012639	0.00664236	16646/15194/211323	3
Biological process	GO:0099527	postsynapse to nucleus signaling pathway	3/494	15/23174	0.00361911	0.012639	0.00664236	16646/15194/211323	3
Biological process	GO:1903358	regulation of Golgi organization	3/494	15/23174	0.00361911	0.012639	0.00664236	26413/100986/26395	3
Biological process	GO:0043500	muscle adaptation	8/494	117/23174	0.00362527	0.0126513	0.0066488	108058/13614/22632/56637/11835/606496/12633/16905	8
Biological process	GO:0071326	cellular response to monosaCellular componentharide stimulus	9/494	143/23174	0.00363662	0.0126816	0.00666473	83557/17932/18747/20586/20466/11799/105787/330890/18795	9
Biological process	GO:0051260	protein homooligomerization	17/494	382/23174	0.00368149	0.0128287	0.00674203	22059/20779/12028/16438/15568/14595/99412/15499/19378/12144/13605/19361/20957/12359/20181/22061/328440	17
Biological process	GO:0071236	cellular response to antibiotic	11/494	199/23174	0.00375796	0.0130856	0.00687705	26362/18591/11350/12576/22059/20779/23939/15499/12578/13605/19211	11
Biological process	GO:0051057	positive regulation of small GTPase mediated signal transduction	6/494	70/23174	0.00377303	0.0131189	0.00689456	108058/20779/17311/26395/19417/211323	6
Biological process	GO:1901796	regulation of signal transduction by p53 class mediator	6/494	70/23174	0.00377303	0.0131189	0.00689456	22062/22059/17701/12578/11920/22187	6
Biological process	GO:0006914	autophagy	17/494	383/23174	0.003779	0.0131205	0.0068954	11651/110147/11350/50505/22059/20869/56637/15194/606496/99412/12578/26395/110213/11920/67773/105787/67588	17
Biological process	GO:0061919	process utilizing autophagic mechanism	17/494	383/23174	0.003779	0.0131205	0.0068954	11651/110147/11350/50505/22059/20869/56637/15194/606496/99412/12578/26395/110213/11920/67773/105787/67588	17
Biological process	GO:0031663	lipopolysaCellular componentharide-mediated signaling pathway	5/494	49/23174	0.00380133	0.0131789	0.00692607	21803/11651/26416/21926/26413	5
Biological process	GO:0070169	positive regulation of biomineral tissue development	5/494	49/23174	0.00380133	0.0131789	0.00692607	19242/67141/22417/16591/100038882	5
Biological process	GO:0002065	columnar/cuboidal epithelial cell differentiation	9/494	144/23174	0.00380793	0.0131922	0.00693305	12558/11350/19401/18472/22417/102247/18119/20181/22061	9
Biological process	GO:0019751	polyol metabolic process	8/494	118/23174	0.00381835	0.0132186	0.00694697	114875/16867/16330/77116/18795/19211/19229/17171	8
Biological process	GO:0003018	vascular process in circulatory system	11/494	200/23174	0.00390266	0.0135007	0.0070952	11548/13614/21803/12288/11651/18591/21926/13649/18159/26395/54611	11
Biological process	GO:0010611	regulation of cardiac muscle hypertrophy	6/494	71/23174	0.00404877	0.0139859	0.00735017	108058/13614/22632/56637/606496/16905	6
Biological process	GO:0042509	regulation of tyrosine phosphorylation of STAT protein	6/494	71/23174	0.00404877	0.0139859	0.00735017	21926/18983/433759/14360/15499/16590	6
Biological process	GO:0010614	negative regulation of cardiac muscle hypertrophy	4/494	31/23174	0.00406745	0.0140199	0.00736807	22632/56637/606496/16905	4
Biological process	GO:0045066	regulatory T cell differentiation	4/494	31/23174	0.00406745	0.0140199	0.00736807	21803/211651/14087/12053	4
Biological process	GO:0070266	necroptotic process	4/494	31/23174	0.00406745	0.0140199	0.00736807	21926/22059/56449/12633	4
Biological process	GO:0031644	regulation of neurological system process	10/494	173/23174	0.00410211	0.0141292	0.00742548	13614/21926/20779/56637/77116/19211/19229/56508/93742/211323	10
Biological process	GO:0030865	cortical cytoskeleton organization	5/494	50/23174	0.00415111	0.0142465	0.00748713	21926/12568/18472/12317/13605	5
Biological process	GO:0032784	regulation of DNA-templated transcription, elongation	5/494	50/23174	0.00415111	0.0142465	0.00748713	225160/70238/58230/57261/26395	5
Biological process	GO:0035137	hindlimb morphogenesis	5/494	50/23174	0.00415111	0.0142465	0.00748713	235320/17701/20586/17702/22061	5
Biological process	GO:0043370	regulation of CD4-positive, alpha-beta T cell differentiation	5/494	50/23174	0.00415111	0.0142465	0.00748713	21803/17863/19401/12053/74131	5
Biological process	GO:0051055	negative regulation of lipid biosynthetic process	5/494	50/23174	0.00415111	0.0142465	0.00748713	12189/18591/20869/22417/18033	5
Biological process	GO:0120031	plasma membrane bounded cell projection assembly	20/494	486/23174	0.00415506	0.0142498	0.00748887	218294/11350/242687/12540/66722/77579/13196/434204/13852/18004/15194/216846/110350/16590/19725/15519/229776/18000/22210/54562	20
Biological process	GO:0002697	regulation of immune effector process	18/494	420/23174	0.00421954	0.0144586	0.00759861	21803/26416/21926/17863/225160/19401/18861/17350/81702/110213/17685/20466/71890/12053/12520/14125/22324/74131	18
Biological process	GO:0045582	positive regulation of T cell differentiation	7/494	95/23174	0.00422505	0.0144586	0.00759861	21803/235320/17863/19401/15519/12053/74131	7
Biological process	GO:0070585	protein localization to mitochondrion	7/494	95/23174	0.00422505	0.0144586	0.00759861	11651/12028/15525/606496/12578/15519/105787	7
Biological process	GO:0000271	polysaCellular componentharide biosynthetic process	6/494	72/23174	0.00433913	0.0147915	0.00777359	21803/11651/18591/56336/53412/18033	6
Biological process	GO:0007632	visual behavior	6/494	72/23174	0.00433913	0.0147915	0.00777359	11548/12288/12568/53418/15194/16590	6
Biological process	GO:0000729	DNA double-strand break processing	3/494	16/23174	0.0043844	0.0147915	0.00777359	52864/12144/26972	3
Biological process	GO:0002327	immature B cell differentiation	3/494	16/23174	0.0043844	0.0147915	0.00777359	11350/16590/11920	3
Biological process	GO:0010752	regulation of cGMP-mediated signaling	3/494	16/23174	0.0043844	0.0147915	0.00777359	18159/230103/19229	3
Biological process	GO:0042772	DNA damage response, signal transduction resulting in transcription	3/494	16/23174	0.0043844	0.0147915	0.00777359	22059/71890/12190	3
Biological process	GO:0043923	positive regulation by host of viral transcription	3/494	16/23174	0.0043844	0.0147915	0.00777359	16476/20683/20586	3
Biological process	GO:0048070	regulation of developmental pigmentation	3/494	16/23174	0.0043844	0.0147915	0.00777359	12028/17311/16590	3
Biological process	GO:0048302	regulation of isotype switching to IgG isotypes	3/494	16/23174	0.0043844	0.0147915	0.00777359	18861/17350/17685	3
Biological process	GO:0051151	negative regulation of smooth muscle cell differentiation	3/494	16/23174	0.0043844	0.0147915	0.00777359	14180/18591/81702	3
Biological process	GO:0051938	L-glutamate import	3/494	16/23174	0.0043844	0.0147915	0.00777359	21926/15194/18000	3
Biological process	GO:0060766	negative regulation of androgen receptor signaling pathway	3/494	16/23174	0.0043844	0.0147915	0.00777359	433759/20586/18119	3
Biological process	GO:0071379	cellular response to prostaglandin stimulus	3/494	16/23174	0.0043844	0.0147915	0.00777359	11651/105787/19217	3
Biological process	GO:0071498	cellular response to fluid shear stress	3/494	16/23174	0.0043844	0.0147915	0.00777359	20779/23939/19229	3
Biological process	GO:0098696	regulation of neurotransmitter receptor localization to postsynaptic specialization membrane	3/494	16/23174	0.0043844	0.0147915	0.00777359	56637/26395/56508	3
Biological process	GO:0099640	axo-dendritic protein transport	3/494	16/23174	0.0043844	0.0147915	0.00777359	30957/21750/15507	3
Biological process	GO:1900119	positive regulation of execution phase of apoptosis	3/494	16/23174	0.0043844	0.0147915	0.00777359	22059/12028/15499	3
Biological process	GO:1901722	regulation of cell proliferation involved in kidney development	3/494	16/23174	0.0043844	0.0147915	0.00777359	83557/18591/12633	3
Biological process	GO:1902337	regulation of apoptotic process involved in morphogenesis	3/494	16/23174	0.0043844	0.0147915	0.00777359	12028/14595/12578	3
Biological process	GO:2000647	negative regulation of stem cell proliferation	3/494	16/23174	0.0043844	0.0147915	0.00777359	21803/22059/19242	3
Biological process	GO:1903409	reactive oxygen species biosynthetic process	8/494	121/23174	0.00444551	0.0149871	0.00787636	11651/21926/26420/13982/14360/15519/12633/19229	8
Biological process	GO:0006352	DNA-templated transcription, initiation	7/494	96/23174	0.0044758	0.0150786	0.00792443	16476/22059/21374/13982/17450/72504/16890	7
Biological process	GO:0032355	response to estradiol	5/494	51/23174	0.00452326	0.0152062	0.00799151	21803/13649/13982/15499/17702	5
Biological process	GO:0043470	regulation of carbohydrate catabolic process	5/494	51/23174	0.00452326	0.0152062	0.00799151	19017/11548/108099/22059/105787	5
Biological process	GO:0070542	response to fatty acid	5/494	51/23174	0.00452326	0.0152062	0.00799151	11651/12567/105787/18795/19217	5
Biological process	GO:0010950	positive regulation of endopeptidase activity	9/494	148/23174	0.0045573	0.0152951	0.00803821	21926/12028/233489/26420/14360/15499/13205/12578/18119	9
Biological process	GO:0051236	establishment of RNA localization	9/494	148/23174	0.0045573	0.0152951	0.00803821	225160/21750/66011/20218/15194/15499/11920/83454/12877	9
Biological process	GO:0032212	positive regulation of telomere maintenance via telomerase	4/494	32/23174	0.0045714	0.0152951	0.00803821	26413/11920/20877/18005	4
Biological process	GO:0032508	DNA duplex unwinding	4/494	32/23174	0.0045714	0.0152951	0.00803821	71567/17535/12144/19361	4
Biological process	GO:0035094	response to nicotine	4/494	32/23174	0.0045714	0.0152951	0.00803821	21926/26413/12801/18033	4
Biological process	GO:0099563	modification of synaptic structure	4/494	32/23174	0.0045714	0.0152951	0.00803821	11350/56637/12540/77579	4
Biological process	GO:0046394	carboxylic acid biosynthetic process	16/494	358/23174	0.00457215	0.0152951	0.00803821	12189/19017/13614/21803/18591/108099/22059/26420/15194/13244/19378/16833/105787/14125/22259/18033	16
Biological process	GO:0002705	positive regulation of leukocyte mediated immunity	10/494	176/23174	0.00462784	0.0154705	0.0081304	21803/21926/18861/17350/17685/71890/12520/14125/22324/74131	10
Biological process	GO:0051155	positive regulation of striated muscle cell differentiation	6/494	73/23174	0.00464457	0.0155155	0.00815408	13614/21803/26416/56637/232174/211323	6
Biological process	GO:0016053	organic acid biosynthetic process	16/494	359/23174	0.00469449	0.0156713	0.00823595	12189/19017/13614/21803/18591/108099/22059/26420/15194/13244/19378/16833/105787/14125/22259/18033	16
Biological process	GO:0043488	regulation of mRNA stability	7/494	97/23174	0.00473763	0.0157822	0.00829421	13164/15568/230908/18173/17164/14573/53422	7
Biological process	GO:0048525	negative regulation of viral process	7/494	97/23174	0.00473763	0.0157822	0.00829421	21926/16476/230908/433759/17535/21849/100038882	7
Biological process	GO:1900542	regulation of purine nucleotide metabolic process	7/494	97/23174	0.00473763	0.0157822	0.00829421	19017/108099/22059/26395/12534/268697/105787	7
Biological process	GO:0006839	mitochondrial transport	10/494	177/23174	0.00481439	0.0160267	0.0084227	12799/22059/12028/15525/56637/15194/606496/12578/15519/105787	10
Biological process	GO:0035924	cellular response to vascular endothelial growth factor stimulus	5/494	52/23174	0.00491854	0.0163278	0.00858095	11651/26416/18591/15507/17164	5
Biological process	GO:0070265	necrotic cell death	5/494	52/23174	0.00491854	0.0163278	0.00858095	21926/22059/12028/56449/12633	5
Biological process	GO:0072698	protein localization to microtubule cytoskeleton	5/494	52/23174	0.00491854	0.0163278	0.00858095	56637/15194/244329/17997/20878	5
Biological process	GO:2000677	regulation of transcription regulatory region DNA binding	5/494	52/23174	0.00491854	0.0163278	0.00858095	21803/17701/20466/71890/17702	5
Biological process	GO:0014743	regulation of muscle hypertrophy	6/494	74/23174	0.00496554	0.0164609	0.0086509	108058/13614/22632/56637/606496/16905	6
Biological process	GO:1901224	positive regulation of NIK/NF-kappaB signaling	6/494	74/23174	0.00496554	0.0164609	0.0086509	13614/21926/13649/12317/108679/17171	6
Biological process	GO:0014044	Schwann cell development	4/494	33/23174	0.0051157	0.0168648	0.00886319	11651/12568/93742/211323	4
Biological process	GO:0014741	negative regulation of muscle hypertrophy	4/494	33/23174	0.0051157	0.0168648	0.00886319	22632/56637/606496/16905	4
Biological process	GO:0021680	cerebellar Purkinje cell layer development	4/494	33/23174	0.0051157	0.0168648	0.00886319	14828/77579/53418/67269	4
Biological process	GO:0048566	embryonic digestive tract development	4/494	33/23174	0.0051157	0.0168648	0.00886319	71175/14180/17863/19378	4
Biological process	GO:1901099	negative regulation of signal transduction in absence of ligand	4/494	33/23174	0.0051157	0.0168648	0.00886319	21926/23939/14360/14573	4
Biological process	GO:1903146	regulation of autophagy of mitochondrion	4/494	33/23174	0.0051157	0.0168648	0.00886319	22059/15194/606496/67588	4
Biological process	GO:2000036	regulation of stem cell population maintenance	4/494	33/23174	0.0051157	0.0168648	0.00886319	15568/19242/18044/22061	4
Biological process	GO:2001240	negative regulation of extrinsic apoptotic signaling pathway in absence of ligand	4/494	33/23174	0.0051157	0.0168648	0.00886319	21926/23939/14360/14573	4
Biological process	GO:0099175	regulation of postsynapse organization	8/494	124/23174	0.00514899	0.0169628	0.0089147	12558/12568/18222/19242/18472/14360/19211/56508	8
Biological process	GO:0001659	temperature homeostasis	10/494	179/23174	0.00520518	0.0171105	0.00899231	19017/21926/20869/54635/15901/15499/14748/12801/22259/53422	10
Biological process	GO:0019933	cAMP-mediated signaling	10/494	179/23174	0.00520518	0.0171105	0.00899231	381489/16867/11548/606496/14748/16336/54611/56508/22210/19217	10
Biological process	GO:0040013	negative regulation of locomotion	15/494	331/23174	0.0052385	0.0171105	0.00899231	19017/21803/11651/18591/56637/56218/19242/12317/21849/22417/67588/18795/19211/18119/211323	15
Biological process	GO:0001675	acrosome assembly	3/494	17/23174	0.00524048	0.0171105	0.00899231	15463/18472/19725	3
Biological process	GO:0010566	regulation of ketone biosynthetic process	3/494	17/23174	0.00524048	0.0171105	0.00899231	19017/12724/22417	3
Biological process	GO:0010919	regulation of inositol phosphate biosynthetic process	3/494	17/23174	0.00524048	0.0171105	0.00899231	16867/19229/17171	3
Biological process	GO:0038092	nodal signaling pathway	3/494	17/23174	0.00524048	0.0171105	0.00899231	17126/50796/18119	3
Biological process	GO:0046838	phosphorylated carbohydrate dephosphorylation	3/494	17/23174	0.00524048	0.0171105	0.00899231	16330/77116/19211	3
Biological process	GO:0048291	isotype switching to IgG isotypes	3/494	17/23174	0.00524048	0.0171105	0.00899231	18861/17350/17685	3
Biological process	GO:0071545	inositol phosphate catabolic process	3/494	17/23174	0.00524048	0.0171105	0.00899231	16330/77116/19211	3
Biological process	GO:1904355	positive regulation of telomere capping	3/494	17/23174	0.00524048	0.0171105	0.00899231	26413/20877/18005	3
Biological process	GO:1904748	regulation of apoptotic process involved in development	3/494	17/23174	0.00524048	0.0171105	0.00899231	12028/14595/12578	3
Biological process	GO:2000001	regulation of DNA damage checkpoint	3/494	17/23174	0.00524048	0.0171105	0.00899231	225160/99375/18004	3
Biological process	GO:0045639	positive regulation of myeloid cell differentiation	7/494	99/23174	0.0052957	0.0172304	0.00905532	21803/26416/21926/16476/56637/17311/100038882	7
Biological process	GO:0106027	neuron projection organization	7/494	99/23174	0.0052957	0.0172304	0.00905532	12568/56637/12540/18472/14360/77116/19211	7
Biological process	GO:0007045	cell-substrate adherens junction assembly	6/494	75/23174	0.0053025	0.0172304	0.00905532	11350/20779/434204/22417/19211/19229	6
Biological process	GO:0007260	tyrosine phosphorylation of STAT protein	6/494	75/23174	0.0053025	0.0172304	0.00905532	21926/18983/433759/14360/15499/16590	6
Biological process	GO:0008088	axo-dendritic transport	6/494	75/23174	0.0053025	0.0172304	0.00905532	30957/21750/18472/15194/22223/15507	6
Biological process	GO:0042446	hormone biosynthetic process	6/494	75/23174	0.0053025	0.0172304	0.00905532	19017/16867/12724/21926/22417/18033	6
Biological process	GO:0048041	focal adhesion assembly	6/494	75/23174	0.0053025	0.0172304	0.00905532	11350/20779/434204/22417/19211/19229	6
Biological process	GO:0010823	negative regulation of mitochondrion organization	5/494	53/23174	0.00533771	0.017333	0.00910924	19017/11651/22059/67588/16905	5
Biological process	GO:0090596	sensory organ morphogenesis	14/494	300/23174	0.00534142	0.0173332	0.00910936	71175/13614/14180/18591/22632/26413/12028/20683/17701/19242/19763/232174/433759/67269	14
Biological process	GO:0051250	negative regulation of lymphocyte activation	9/494	152/23174	0.00541677	0.0175658	0.0092316	21803/26362/225160/17120/17289/22174/12578/11920/12053	9
Biological process	GO:0090257	regulation of muscle system process	12/494	239/23174	0.00545134	0.0176659	0.00928419	109676/108058/11548/13614/12288/22632/56637/22218/606496/26395/16590/16905	12
Biological process	GO:0051258	protein polymerization	13/494	270/23174	0.00552904	0.0179055	0.00941013	17755/11350/12576/56378/434204/99412/54418/74237/16765/15519/67141/19229/18000	13
Biological process	GO:0031123	RNA 3'-end processing	7/494	100/23174	0.00559255	0.0180744	0.00949886	83557/83410/74320/15499/108062/268697/12877	7
Biological process	GO:0034754	cellular hormone metabolic process	7/494	100/23174	0.00559255	0.0180744	0.00949886	19017/12724/13982/232174/19378/11576/22417	7
Biological process	GO:0042310	vasoconstriction	7/494	100/23174	0.00559255	0.0180744	0.00949886	11548/13614/12288/11651/18591/13649/26395	7
Biological process	GO:0010810	regulation of cell-substrate adhesion	11/494	210/23174	0.0056082	0.0181127	0.00951898	11350/20779/56637/19242/12578/12317/12053/22417/19211/18708/19229	11
Biological process	GO:0009749	response to glucose	10/494	181/23174	0.00562039	0.0181398	0.00953322	83557/17932/23957/18747/17126/20586/20466/11799/105787/330890	10
Biological process	GO:0006809	nitric oxide biosynthetic process	6/494	76/23174	0.0056559	0.018242	0.00958695	11651/21926/26420/13982/15519/19229	6
Biological process	GO:0045815	positive regulation of gene expression, epigenetic	4/494	34/23174	0.00570175	0.018365	0.00965162	52463/12649/171506/107970	4
Biological process	GO:0050869	negative regulation of B cell activation	4/494	34/23174	0.00570175	0.018365	0.00965162	225160/12578/11920/12053	4
Biological process	GO:0035065	regulation of histone acetylation	5/494	54/23174	0.00578151	0.0185842	0.00976682	12189/21803/13018/20466/12649	5
Biological process	GO:0035272	exocrine system development	5/494	54/23174	0.00578151	0.0185842	0.00976682	12724/18591/21926/13649/18970	5
Biological process	GO:1903533	regulation of protein targeting	5/494	54/23174	0.00578151	0.0185842	0.00976682	12568/606496/14360/12578/105787	5
Biological process	GO:0007015	actin filament organization	17/494	400/23174	0.00579038	0.0186002	0.00977522	11350/20779/242687/12540/77579/56378/23969/434204/15901/54418/16765/71890/22417/21754/18708/19229/384619	17
Biological process	GO:0003300	cardiac muscle hypertrophy	7/494	101/23174	0.00590169	0.0189068	0.00993635	108058/11548/13614/22632/56637/606496/16905	7
Biological process	GO:0006140	regulation of nucleotide metabolic process	7/494	101/23174	0.00590169	0.0189068	0.00993635	19017/108099/22059/26395/12534/268697/105787	7
Biological process	GO:0031532	actin cytoskeleton reorganization	7/494	101/23174	0.00590169	0.0189068	0.00993635	21803/11350/13039/434204/16590/19229/13052	7
Biological process	GO:0044264	cellular polysaCellular componentharide metabolic process	7/494	101/23174	0.00590169	0.0189068	0.00993635	11548/11651/108099/56637/56336/606496/53412	7
Biological process	GO:0030148	sphingolipid biosynthetic process	6/494	77/23174	0.00602619	0.0192798	0.0101324	56386/53897/57370/56336/13244/14421	6
Biological process	GO:0051966	regulation of synaptic transmission, glutamatergic	6/494	77/23174	0.00602619	0.0192798	0.0101324	12558/12568/13649/18747/12801/19229	6
Biological process	GO:1990845	adaptive thermogenesis	9/494	155/23174	0.0061398	0.0196301	0.0103164	19017/20869/54635/15901/15499/14748/22259/12164/53422	9
Biological process	GO:0006700	C21-steroid hormone biosynthetic process	3/494	18/23174	0.00619012	0.0196591	0.0103317	19017/12724/22417	3
Biological process	GO:0010869	regulation of receptor biosynthetic process	3/494	18/23174	0.00619012	0.0196591	0.0103317	13614/433759/22259	3
Biological process	GO:0030952	establishment or maintenance of cytoskeleton polarity	3/494	18/23174	0.00619012	0.0196591	0.0103317	227743/73804/16905	3
Biological process	GO:0034695	response to prostaglandin E	3/494	18/23174	0.00619012	0.0196591	0.0103317	11651/105787/19217	3
Biological process	GO:0035518	histone H2A monoubiquitination	3/494	18/23174	0.00619012	0.0196591	0.0103317	21402/70238/19763	3
Biological process	GO:0042754	negative regulation of circadian rhythm	3/494	18/23174	0.00619012	0.0196591	0.0103317	20937/64707/20466	3
Biological process	GO:0060044	negative regulation of cardiac muscle cell proliferation	3/494	18/23174	0.00619012	0.0196591	0.0103317	22062/19211/13052	3
Biological process	GO:0097091	synaptic vesicle clustering	3/494	18/23174	0.00619012	0.0196591	0.0103317	12558/233489/19211	3
Biological process	GO:1900153	positive regulation of nuclear-transcribed mRNA catabolic process, deadenylation-dependent decay	3/494	18/23174	0.00619012	0.0196591	0.0103317	18983/378430/22057	3
Biological process	GO:1903909	regulation of receptor clustering	3/494	18/23174	0.00619012	0.0196591	0.0103317	21803/19242/12520	3
Biological process	GO:0034763	negative regulation of transmembrane transport	8/494	128/23174	0.00621567	0.019714	0.0103605	108058/21803/11651/21926/22218/13982/606496/19211	8
Biological process	GO:0042177	negative regulation of protein catabolic process	8/494	128/23174	0.00621567	0.019714	0.0103605	13121/13649/14360/12578/54418/224727/71890/211323	8
Biological process	GO:0010665	regulation of cardiac muscle cell apoptotic process	5/494	55/23174	0.00625067	0.0197986	0.010405	108058/22059/15499/12633/19211	5
Biological process	GO:0042531	positive regulation of tyrosine phosphorylation of STAT protein	5/494	55/23174	0.00625067	0.0197986	0.010405	21926/433759/14360/15499/16590	5
Biological process	GO:0009746	response to hexose	10/494	184/23174	0.00629123	0.0199139	0.0104656	83557/17932/23957/18747/17126/20586/20466/11799/105787/330890	10
Biological process	GO:0045940	positive regulation of steroid metabolic process	4/494	35/23174	0.00633091	0.0199996	0.0105107	19017/21926/22417/14308	4
Biological process	GO:0051973	positive regulation of telomerase activity	4/494	35/23174	0.00633091	0.0199996	0.0105107	26413/20877/15519/18005	4
Biological process	GO:2000249	regulation of actin cytoskeleton reorganization	4/494	35/23174	0.00633091	0.0199996	0.0105107	21803/11350/13039/19229	4
Biological process	GO:0005977	glycogen metabolic process	6/494	78/23174	0.00641384	0.020208	0.0106202	11548/11651/108099/56637/606496/53412	6
Biological process	GO:0006073	cellular glucan metabolic process	6/494	78/23174	0.00641384	0.020208	0.0106202	11548/11651/108099/56637/606496/53412	6
Biological process	GO:0044042	glucan metabolic process	6/494	78/23174	0.00641384	0.020208	0.0106202	11548/11651/108099/56637/606496/53412	6
Biological process	GO:0060976	coronary vasculature development	6/494	78/23174	0.00641384	0.020208	0.0106202	14180/18591/77579/110350/20586/20181	6
Biological process	GO:0045165	cell fate commitment	13/494	275/23174	0.00641881	0.0202103	0.0106214	21803/110147/22059/12540/19401/11835/232174/13363/17126/20586/22417/18119/211323	13
Biological process	GO:0043200	response to amino acid	10/494	185/23174	0.00652815	0.0205411	0.0107952	21926/54635/224826/13649/13436/14360/15499/13435/110213/12877	10
Biological process	GO:0009408	response to heat	7/494	103/23174	0.00655803	0.0206214	0.0108375	15525/14828/22218/18747/15499/15519/15512	7
Biological process	GO:0003007	heart morphogenesis	13/494	276/23174	0.00660972	0.0207566	0.0109085	71175/21803/14180/16476/22059/19401/17701/606496/20586/19378/17702/18119/20181	13
Biological process	GO:0030072	peptide hormone secretion	13/494	276/23174	0.00660972	0.0207566	0.0109085	13614/12288/17932/21926/13649/23957/15194/433759/17126/11799/12801/330890/56508	13
Biological process	GO:1901342	regulation of vasculature development	15/494	340/23174	0.00665367	0.0208783	0.0109724	12189/14180/18591/11350/20683/19242/23939/65255/15901/16590/15507/22417/12633/19229/18119	15
Biological process	GO:0010594	regulation of endothelial cell migration	9/494	157/23174	0.0066616	0.0208783	0.0109724	21803/11651/18591/11350/20683/56218/12317/15507/19229	9
Biological process	GO:0046631	alpha-beta T cell activation	9/494	157/23174	0.0066616	0.0208783	0.0109724	21803/235320/17863/11350/19401/12144/12053/12520/74131	9
Biological process	GO:0002460	adaptive immune response based on somatic recombination of immune receptors built from immunoglobulin superfamily domains	18/494	440/23174	0.00674314	0.0211148	0.0110967	20592/21803/21926/225160/70238/13870/58230/11634/18861/17350/26909/17685/71890/12053/18173/12520/14125/74131	18
Biological process	GO:0050994	regulation of lipid catabolic process	5/494	56/23174	0.00674593	0.0211148	0.0110967	11651/12567/21926/105787/12801	5
Biological process	GO:0022408	negative regulation of cell-cell adhesion	10/494	186/23174	0.00677195	0.0211685	0.0111249	21803/11651/11350/17120/23939/12578/26395/71890/12053/18708	10
Biological process	GO:0051668	localization within membrane	10/494	186/23174	0.00677195	0.0211685	0.0111249	21803/12558/12568/56637/18222/19242/23969/26395/12520/56508	10
Biological process	GO:0032231	regulation of actin filament bundle assembly	7/494	104/23174	0.00690584	0.0215728	0.0113374	11350/242687/15901/16765/22417/21754/18708	7
Biological process	GO:0031214	biomineral tissue development	9/494	158/23174	0.00693494	0.0216495	0.0113778	21803/19242/20937/67141/22417/16591/100038882/17702/19229	9
Biological process	GO:0002861	regulation of inflammatory response to antigenic stimulus	4/494	36/23174	0.00700448	0.0217385	0.0114245	21926/12801/12520/14125	4
Biological process	GO:0034243	regulation of transcription elongation from RNA polymerase II promoter	4/494	36/23174	0.00700448	0.0217385	0.0114245	70238/58230/57261/26395	4
Biological process	GO:0035794	positive regulation of mitochondrial membrane permeability	4/494	36/23174	0.00700448	0.0217385	0.0114245	22059/12028/56637/606496	4
Biological process	GO:0035886	vascular smooth muscle cell differentiation	4/494	36/23174	0.00700448	0.0217385	0.0114245	14180/18591/16590/20586	4
Biological process	GO:0048009	insulin-like growth factor receptor signaling pathway	4/494	36/23174	0.00700448	0.0217385	0.0114245	11651/11835/18795/18708	4
Biological process	GO:0098751	bone cell development	4/494	36/23174	0.00700448	0.0217385	0.0114245	20779/242687/18472/16590	4
Biological process	GO:1904358	positive regulation of telomere maintenance via telomere lengthening	4/494	36/23174	0.00700448	0.0217385	0.0114245	26413/11920/20877/18005	4
Biological process	GO:1905209	positive regulation of cardiocyte differentiation	4/494	36/23174	0.00700448	0.0217385	0.0114245	13614/21803/56637/211323	4
Biological process	GO:2000516	positive regulation of CD4-positive, alpha-beta T cell activation	4/494	36/23174	0.00700448	0.0217385	0.0114245	17863/19401/12520/74131	4
Biological process	GO:0030534	adult behavior	10/494	187/23174	0.00702275	0.021781	0.0114469	12799/11548/12288/110147/12568/18472/22223/50933/19211/67269	10
Biological process	GO:0030218	erythrocyte differentiation	8/494	131/23174	0.00711984	0.0220534	0.01159	26416/20683/16590/20586/76044/12053/100038882/18795	8
Biological process	GO:2001056	positive regulation of cysteine-type endopeptidase activity	8/494	131/23174	0.00711984	0.0220534	0.01159	21926/12028/26420/14360/15499/13205/12578/18119	8
Biological process	GO:0001678	cellular glucose homeostasis	9/494	159/23174	0.00721679	0.0221667	0.0116496	83557/17932/18747/20586/20466/11799/105787/330890/18708	9
Biological process	GO:0006309	apoptotic DNA fragmentation	3/494	19/23174	0.00723583	0.0221667	0.0116496	12028/15499/12578	3
Biological process	GO:0010623	programmed cell death involved in cell development	3/494	19/23174	0.00723583	0.0221667	0.0116496	12028/17311/16590	3
Biological process	GO:0031936	negative regulation of chromatin silencing	3/494	19/23174	0.00723583	0.0221667	0.0116496	52463/171506/107970	3
Biological process	GO:0033194	response to hydroperoxide	3/494	19/23174	0.00723583	0.0221667	0.0116496	20683/13852/22594	3
Biological process	GO:0034643	establishment of mitochondrion localization, microtubule-mediated	3/494	19/23174	0.00723583	0.0221667	0.0116496	17755/22223/22187	3
Biological process	GO:0035994	response to muscle stretch	3/494	19/23174	0.00723583	0.0221667	0.0116496	26416/16476/18033	3
Biological process	GO:0046827	positive regulation of protein export from nucleus	3/494	19/23174	0.00723583	0.0221667	0.0116496	19042/56637/18747	3
Biological process	GO:0047497	mitochondrion transport along microtubule	3/494	19/23174	0.00723583	0.0221667	0.0116496	17755/22223/22187	3
Biological process	GO:0050774	negative regulation of dendrite morphogenesis	3/494	19/23174	0.00723583	0.0221667	0.0116496	56637/15901/19211	3
Biological process	GO:0090030	regulation of steroid hormone biosynthetic process	3/494	19/23174	0.00723583	0.0221667	0.0116496	16867/12724/22417	3
Biological process	GO:0098840	protein transport along microtubule	3/494	19/23174	0.00723583	0.0221667	0.0116496	30957/21750/15507	3
Biological process	GO:0099118	microtubule-based protein transport	3/494	19/23174	0.00723583	0.0221667	0.0116496	30957/21750/15507	3
Biological process	GO:1903214	regulation of protein targeting to mitochondrion	3/494	19/23174	0.00723583	0.0221667	0.0116496	606496/12578/105787	3
Biological process	GO:1904385	cellular response to angiotensin	3/494	19/23174	0.00723583	0.0221667	0.0116496	20779/15499/18033	3
Biological process	GO:0030500	regulation of bone mineralization	6/494	80/23174	0.00724297	0.0221667	0.0116496	19242/20937/22417/16591/100038882/19229	6
Biological process	GO:0043154	negative regulation of cysteine-type endopeptidase activity involved in apoptotic process	6/494	80/23174	0.00724297	0.0221667	0.0116496	11651/110651/20779/13205/11799/12633	6
Biological process	GO:0046209	nitric oxide metabolic process	6/494	80/23174	0.00724297	0.0221667	0.0116496	11651/21926/26420/13982/15519/19229	6
Biological process	GO:0002067	glandular epithelial cell differentiation	5/494	57/23174	0.007268	0.0221667	0.0116496	19401/22417/102247/20181/22061	5
Biological process	GO:0010463	mesenchymal cell proliferation	5/494	57/23174	0.007268	0.0221667	0.0116496	14180/17701/19242/16905/22061	5
Biological process	GO:0019080	viral gene expression	5/494	57/23174	0.007268	0.0221667	0.0116496	16476/20683/230908/433759/20586	5
Biological process	GO:0048016	inositol phosphate-mediated signaling	5/494	57/23174	0.007268	0.0221667	0.0116496	13614/21926/56637/23939/211323	5
Biological process	GO:0098930	axonal transport	5/494	57/23174	0.007268	0.0221667	0.0116496	30957/21750/18472/22223/15507	5
Biological process	GO:2001169	regulation of ATP biosynthetic process	5/494	57/23174	0.007268	0.0221667	0.0116496	19017/108099/22059/26395/105787	5
Biological process	GO:0035296	regulation of tube diameter	9/494	160/23174	0.00750731	0.0228673	0.0120178	11548/13614/12288/11651/18591/21926/13649/18159/26395	9
Biological process	GO:0097746	regulation of blood vessel diameter	9/494	160/23174	0.00750731	0.0228673	0.0120178	11548/13614/12288/11651/18591/21926/13649/18159/26395	9
Biological process	GO:1902903	regulation of supramolecular fiber organization	15/494	345/23174	0.00756349	0.0230237	0.0121	13614/17755/11350/12576/242687/56378/434204/15901/54418/16765/74187/22417/21754/18708/19229	15
Biological process	GO:0001822	kidney development	13/494	281/23174	0.00763299	0.0232191	0.0122026	83557/21803/235320/18591/12028/19401/18004/17126/224727/12359/22417/12633/14573	13
Biological process	GO:0043487	regulation of RNA stability	7/494	106/23174	0.00764228	0.0232191	0.0122026	13164/15568/230908/18173/17164/14573/53422	7
Biological process	GO:0097756	negative regulation of blood vessel diameter	7/494	106/23174	0.00764228	0.0232191	0.0122026	11548/13614/12288/11651/18591/13649/26395	7
Biological process	GO:0032103	positive regulation of response to external stimulus	14/494	313/23174	0.00765277	0.0232362	0.0122116	13614/21803/26416/18591/21926/13649/19242/81702/12317/15507/12801/12520/14125/19229	14
Biological process	GO:0031646	positive regulation of neurological system process	6/494	81/23174	0.00768535	0.0233054	0.012248	56637/19211/19229/56508/93742/211323	6
Biological process	GO:0048524	positive regulation of viral process	6/494	81/23174	0.00768535	0.0233054	0.012248	16476/20683/18983/13205/20586/94244	6
Biological process	GO:0002703	regulation of leukocyte mediated immunity	12/494	250/23174	0.00769907	0.0233321	0.012262	21803/21926/225160/18861/17350/17685/71890/12053/12520/14125/22324/74131	12
Biological process	GO:0007435	salivary gland morphogenesis	4/494	37/23174	0.00772372	0.0233475	0.0122701	18591/21926/13649/18970	4
Biological process	GO:0019934	cGMP-mediated signaling	4/494	37/23174	0.00772372	0.0233475	0.0122701	18159/230103/19229/54611	4
Biological process	GO:0032885	regulation of polysaCellular componentharide biosynthetic process	4/494	37/23174	0.00772372	0.0233475	0.0122701	21803/11651/18591/18033	4
Biological process	GO:0033260	nuclear DNA replication	4/494	37/23174	0.00772372	0.0233475	0.0122701	22589/12545/12190/19361	4
Biological process	GO:0001837	epithelial to mesenchymal transition	8/494	133/23174	0.0077755	0.0234891	0.0123445	21803/56637/17701/17126/21849/71890/19211/17702	8
Biological process	GO:0010662	regulation of striated muscle cell apoptotic process	5/494	58/23174	0.0078176	0.0235715	0.0123878	108058/22059/15499/12633/19211	5
Biological process	GO:0044380	protein localization to cytoskeleton	5/494	58/23174	0.0078176	0.0235715	0.0123878	56637/15194/244329/17997/20878	5
Biological process	GO:0070231	T cell apoptotic process	5/494	58/23174	0.0078176	0.0235715	0.0123878	11651/22059/12028/14605/12144	5
Biological process	GO:0001823	mesonephros development	7/494	107/23174	0.00803151	0.0242012	0.0127187	21803/235320/19401/17126/12359/22417/14573	7
Biological process	GO:1990138	neuron projection extension	10/494	191/23174	0.0080986	0.0243879	0.0128169	17755/11350/20869/12568/56637/233489/18472/15519/20878/211323	10
Biological process	GO:0071356	cellular response to tumor necrosis factor	9/494	162/23174	0.00811507	0.024422	0.0128348	12189/11651/26416/21926/26413/59004/56449/19229/18033	9
Biological process	GO:0002718	regulation of cytokine production involved in immune response	6/494	82/23174	0.00814688	0.0244869	0.0128689	21803/26416/21926/12053/12520/74131	6
Biological process	GO:0051899	membrane depolarization	6/494	82/23174	0.00814688	0.0244869	0.0128689	108058/13614/12288/16476/20779/12578	6
Biological process	GO:0045861	negative regulation of proteolysis	15/494	348/23174	0.00815541	0.0244971	0.0128743	11651/22059/110651/20779/12568/233489/15194/13205/12578/224727/11799/12633/22259/18708/213945	15
Biological process	GO:0001573	ganglioside metabolic process	3/494	20/23174	0.00837977	0.0250131	0.0131455	56386/56336/14421	3
Biological process	GO:0006089	lactate metabolic process	3/494	20/23174	0.00837977	0.0250131	0.0131455	22059/15194/16833	3
Biological process	GO:0032288	myelin assembly	3/494	20/23174	0.00837977	0.0250131	0.0131455	14712/77116/22239	3
Biological process	GO:0046697	decidualization	3/494	20/23174	0.00837977	0.0250131	0.0131455	26413/13039/19242	3
Biological process	GO:0050434	positive regulation of viral transcription	3/494	20/23174	0.00837977	0.0250131	0.0131455	16476/20683/20586	3
Biological process	GO:0051195	negative regulation of cofactor metabolic process	3/494	20/23174	0.00837977	0.0250131	0.0131455	19017/22059/14360	3
Biological process	GO:0080111	DNA demethylation	3/494	20/23174	0.00837977	0.0250131	0.0131455	211064/52463/21849	3
Biological process	GO:0097320	plasma membrane tubulation	3/494	20/23174	0.00837977	0.0250131	0.0131455	23969/13196/434204	3
Biological process	GO:1900151	regulation of nuclear-transcribed mRNA catabolic process, deadenylation-dependent decay	3/494	20/23174	0.00837977	0.0250131	0.0131455	18983/378430/22057	3
Biological process	GO:1990776	response to angiotensin	3/494	20/23174	0.00837977	0.0250131	0.0131455	20779/15499/18033	3
Biological process	GO:0010524	positive regulation of calcium ion transport into cytosol	5/494	59/23174	0.00839542	0.0250131	0.0131455	16867/11350/12028/15194/56746	5
Biological process	GO:0010659	cardiac muscle cell apoptotic process	5/494	59/23174	0.00839542	0.0250131	0.0131455	108058/22059/15499/12633/19211	5
Biological process	GO:0031122	cytoplasmic microtubule organization	5/494	59/23174	0.00839542	0.0250131	0.0131455	16211/18472/74237/60530/21335	5
Biological process	GO:0006643	membrane lipid metabolic process	9/494	163/23174	0.00843264	0.0251083	0.0131955	56386/53897/57370/12028/56336/13244/16590/22239/14421	9
Biological process	GO:0035023	regulation of Rho protein signal transduction	8/494	135/23174	0.00847555	0.0252046	0.0132461	11548/12558/11350/16765/13605/12053/19417/22324	8
Biological process	GO:0045598	regulation of fat cell differentiation	8/494	135/23174	0.00847555	0.0252046	0.0132461	21803/235320/11651/26416/21926/15904/50933/17702	8
Biological process	GO:1902108	regulation of mitochondrial membrane permeability involved in apoptotic process	4/494	38/23174	0.00848985	0.0252156	0.0132519	22059/12028/56637/606496	4
Biological process	GO:1905710	positive regulation of membrane permeability	4/494	38/23174	0.00848985	0.0252156	0.0132519	22059/12028/56637/606496	4
Biological process	GO:0006672	ceramide metabolic process	6/494	83/23174	0.00862799	0.025594	0.0134508	56386/53897/57370/56336/13244/14421	6
Biological process	GO:1901888	regulation of cell junction assembly	6/494	83/23174	0.00862799	0.025594	0.0134508	21926/11350/20779/18747/22417/19211	6
Biological process	GO:0021953	central nervous system neuron differentiation	11/494	223/23174	0.0086479	0.0256212	0.0134651	56386/12568/56336/18472/15904/110350/22187/15519/19211/67269/16875	11
Biological process	GO:0030073	insulin secretion	11/494	223/23174	0.0086479	0.0256212	0.0134651	12288/17932/21926/23957/15194/433759/17126/11799/12801/330890/56508	11
Biological process	GO:0005996	monosaCellular componentharide metabolic process	12/494	254/23174	0.00867635	0.0256895	0.013501	11548/11651/26416/21926/80915/22059/20869/20779/14595/105787/18597/18708	12
Biological process	GO:0042180	cellular ketone metabolic process	10/494	193/23174	0.00868196	0.0256902	0.0135013	12189/19017/11651/12724/108099/26420/11576/22417/12801/22259	10
Biological process	GO:0002218	activation of innate immune response	9/494	164/23174	0.00875956	0.0259037	0.0136135	21926/110651/13982/22174/14375/81702/20466/17164/22259	9
Biological process	GO:0097306	cellular response to alcohol	8/494	136/23174	0.00884277	0.0261336	0.0137343	12189/11651/12567/12144/19361/105787/19211/19217	8
Biological process	GO:0032649	regulation of interferon-gamma production	7/494	109/23174	0.00885354	0.0261492	0.0137425	26362/21926/11350/19401/18173/100038882/74131	7
Biological process	GO:1903037	regulation of leukocyte cell-cell adhesion	13/494	287/23174	0.00902185	0.0266298	0.0139951	21803/235320/11651/21926/17863/17120/19401/12578/12144/15519/12053/12520/74131	13
Biological process	GO:0014910	regulation of smooth muscle cell migration	6/494	84/23174	0.00912912	0.0268799	0.0141265	19017/108058/14180/18591/20779/56508	6
Biological process	GO:0034103	regulation of tissue remodeling	6/494	84/23174	0.00912912	0.0268799	0.0141265	22059/12028/13649/14595/12578/14308	6
Biological process	GO:0034333	adherens junction assembly	6/494	84/23174	0.00912912	0.0268799	0.0141265	11350/20779/434204/22417/19211/19229	6
Biological process	GO:2001057	reactive nitrogen species metabolic process	6/494	84/23174	0.00912912	0.0268799	0.0141265	11651/21926/26420/13982/15519/19229	6
Biological process	GO:0008207	C21-steroid hormone metabolic process	4/494	39/23174	0.00930403	0.0272937	0.014344	19017/12724/11576/22417	4
Biological process	GO:0010661	positive regulation of muscle cell apoptotic process	4/494	39/23174	0.00930403	0.0272937	0.014344	108058/22059/12578/19211	4
Biological process	GO:0097009	energy homeostasis	4/494	39/23174	0.00930403	0.0272937	0.014344	19017/22187/105787/12164	4
Biological process	GO:1901021	positive regulation of calcium ion transmembrane transporter activity	4/494	39/23174	0.00930403	0.0272937	0.014344	109676/22218/15194/15512	4
Biological process	GO:1902692	regulation of neuroblast proliferation	4/494	39/23174	0.00930403	0.0272937	0.014344	21803/22059/19242/12316	4
Biological process	GO:2000142	regulation of DNA-templated transcription, initiation	4/494	39/23174	0.00930403	0.0272937	0.014344	16476/22059/13982/17450	4
Biological process	GO:0006907	pinocytosis	3/494	21/23174	0.00962386	0.0281626	0.0148007	26362/17164/22259	3
Biological process	GO:0034694	response to prostaglandin	3/494	21/23174	0.00962386	0.0281626	0.0148007	11651/105787/19217	3
Biological process	GO:0046174	polyol catabolic process	3/494	21/23174	0.00962386	0.0281626	0.0148007	16330/77116/19211	3
Biological process	GO:0046325	negative regulation of glucose import	3/494	21/23174	0.00962386	0.0281626	0.0148007	21926/13982/606496	3
Biological process	GO:0010812	negative regulation of cell-substrate adhesion	5/494	61/23174	0.00963846	0.0281708	0.014805	20779/12578/12053/19211/18708	5
Biological process	GO:0014911	positive regulation of smooth muscle cell migration	5/494	61/23174	0.00963846	0.0281708	0.014805	108058/14180/18591/20779/56508	5
Biological process	GO:0007044	cell-substrate junction assembly	6/494	85/23174	0.00965071	0.028172	0.0148056	11350/20779/434204/22417/19211/19229	6
Biological process	GO:1900407	regulation of cellular response to oxidative stress	6/494	85/23174	0.00965071	0.028172	0.0148056	21926/22059/23939/14360/227743/15507	6
Biological process	GO:0034660	ncRNA metabolic process	18/494	458/23174	0.00995329	0.0290375	0.0152605	83557/22059/211064/195434/12578/17864/20937/20586/74691/57749/74068/83456/98558/330890/76850/18033/94244/671232	18
Biological process	GO:0043271	negative regulation of ion transport	9/494	168/23174	0.0101641	0.0295536	0.0155317	108058/21803/11651/21926/22218/110213/12801/19211/19229	9
Biological process	GO:0007339	binding of sperm to zona pellucida	4/494	40/23174	0.0101674	0.0295536	0.0155317	14595/12745/56746/107970	4
Biological process	GO:0014037	Schwann cell differentiation	4/494	40/23174	0.0101674	0.0295536	0.0155317	11651/12568/93742/211323	4
Biological process	GO:0045022	early endosome to late endosome transport	4/494	40/23174	0.0101674	0.0295536	0.0155317	26413/20779/26395/77116	4
Biological process	GO:0070884	regulation of calcineurin-NFAT signaling cascade	4/494	40/23174	0.0101674	0.0295536	0.0155317	21926/56637/23939/211323	4
Biological process	GO:0106056	regulation of calcineurin-mediated signaling	4/494	40/23174	0.0101674	0.0295536	0.0155317	21926/56637/23939/211323	4
Biological process	GO:0010827	regulation of glucose transmembrane transport	6/494	86/23174	0.0101932	0.0295925	0.0155521	13614/11651/26416/21926/13982/606496	6
Biological process	GO:0042475	odontogenesis of dentin-containing tooth	6/494	86/23174	0.0101932	0.0295925	0.0155521	12028/17701/433759/17702/22061/16875	6
Biological process	GO:0043542	endothelial cell migration	10/494	198/23174	0.0102815	0.0298264	0.015675	21803/11651/18591/11350/20683/56218/12317/15507/19211/19229	10
Biological process	GO:0006354	DNA-templated transcription, elongation	5/494	62/23174	0.010305	0.0298264	0.015675	225160/70238/58230/57261/26395	5
Biological process	GO:0010658	striated muscle cell apoptotic process	5/494	62/23174	0.010305	0.0298264	0.015675	108058/22059/15499/12633/19211	5
Biological process	GO:0043949	regulation of cAMP-mediated signaling	5/494	62/23174	0.010305	0.0298264	0.015675	606496/14748/16336/54611/22210	5
Biological process	GO:0060393	regulation of pathway-restricted SMAD protein phosphorylation	5/494	62/23174	0.010305	0.0298264	0.015675	21803/12155/14566/18119/12164	5
Biological process	GO:0045665	negative regulation of neuron differentiation	12/494	260/23174	0.0103208	0.0298358	0.01568	22062/12568/56637/13196/18472/15901/15904/606496/12317/12316/74203/19211	12
Biological process	GO:0072330	monocarboxylic acid biosynthetic process	12/494	260/23174	0.0103208	0.0298358	0.01568	12189/19017/13614/108099/22059/26420/15194/13244/19378/16833/105787/22259	12
Biological process	GO:0034976	response to endoplasmic reticulum stress	11/494	229/23174	0.0104221	0.030101	0.0158194	16476/22059/12028/56637/16438/14828/110213/224727/78284/18708/19417	11
Biological process	GO:0050921	positive regulation of chemotaxis	8/494	140/23174	0.0104315	0.030101	0.0158194	13614/21803/26416/18591/19242/12317/15507/19229	8
Biological process	GO:0071333	cellular response to glucose stimulus	8/494	140/23174	0.0104315	0.030101	0.0158194	83557/17932/18747/20586/20466/11799/105787/330890	8
Biological process	GO:0002286	T cell activation involved in immune response	7/494	113/23174	0.0106803	0.0307817	0.0161771	21803/17863/22059/19401/12053/18173/12520	7
Biological process	GO:0048814	regulation of dendrite morphogenesis	7/494	113/23174	0.0106803	0.0307817	0.0161771	20869/12568/56637/18222/18472/15901/19211	7
Biological process	GO:0001780	neutrophil homeostasis	3/494	22/23174	0.0109697	0.0313506	0.0164761	26362/83964/17289	3
Biological process	GO:0010666	positive regulation of cardiac muscle cell apoptotic process	3/494	22/23174	0.0109697	0.0313506	0.0164761	108058/22059/19211	3
Biological process	GO:0032897	negative regulation of viral transcription	3/494	22/23174	0.0109697	0.0313506	0.0164761	16476/230908/433759	3
Biological process	GO:0033145	positive regulation of intracellular steroid hormone receptor signaling pathway	3/494	22/23174	0.0109697	0.0313506	0.0164761	11835/22196/381022	3
Biological process	GO:0035510	DNA dealkylation	3/494	22/23174	0.0109697	0.0313506	0.0164761	211064/52463/21849	3
Biological process	GO:0051654	establishment of mitochondrion localization	3/494	22/23174	0.0109697	0.0313506	0.0164761	17755/22223/22187	3
Biological process	GO:0060009	Sertoli cell development	3/494	22/23174	0.0109697	0.0313506	0.0164761	22589/100986/50796	3
Biological process	GO:0060438	trachea development	3/494	22/23174	0.0109697	0.0313506	0.0164761	26413/19401/26395	3
Biological process	GO:0070242	thymocyte apoptotic process	3/494	22/23174	0.0109697	0.0313506	0.0164761	22059/12028/12144	3
Biological process	GO:0072111	cell proliferation involved in kidney development	3/494	22/23174	0.0109697	0.0313506	0.0164761	83557/18591/12633	3
Biological process	GO:1901889	negative regulation of cell junction assembly	3/494	22/23174	0.0109697	0.0313506	0.0164761	21926/20779/19211	3
Biological process	GO:2000010	positive regulation of protein localization to cell surface	3/494	22/23174	0.0109697	0.0313506	0.0164761	11651/21926/211323	3
Biological process	GO:2000310	regulation of NMDA receptor activity	3/494	22/23174	0.0109697	0.0313506	0.0164761	19017/19417/19229	3
Biological process	GO:2000757	negative regulation of peptidyl-lysine acetylation	3/494	22/23174	0.0109697	0.0313506	0.0164761	12189/433759/20466	3
Biological process	GO:0030330	DNA damage response, signal transduction by p53 class mediator	5/494	63/23174	0.0110025	0.0313877	0.0164956	22059/22589/12578/11920/12190	5
Biological process	GO:0042246	tissue regeneration	5/494	63/23174	0.0110025	0.0313877	0.0164956	26416/12576/19242/12520/12633	5
Biological process	GO:0046579	positive regulation of Ras protein signal transduction	5/494	63/23174	0.0110025	0.0313877	0.0164956	108058/17311/26395/19417/211323	5
Biological process	GO:0050867	positive regulation of cell activation	18/494	463/23174	0.0110337	0.031458	0.0165325	21803/235320/26362/18591/17863/19401/18861/17350/227059/17685/71890/12144/15519/56746/12053/12520/14125/74131	18
Biological process	GO:0090407	organophosphate biosynthetic process	19/494	498/23174	0.0110469	0.0314609	0.0165341	114875/19017/16867/21803/18591/26413/108099/22059/14712/18159/230103/26395/16833/105787/102247/18597/18795/19229/17171	19
Biological process	GO:0001783	B cell apoptotic process	4/494	41/23174	0.011081	0.0314609	0.0165341	12028/227059/20877/19211	4
Biological process	GO:0021696	cerebellar cortex morphogenesis	4/494	41/23174	0.011081	0.0314609	0.0165341	12568/26395/67269/14632	4
Biological process	GO:0030501	positive regulation of bone mineralization	4/494	41/23174	0.011081	0.0314609	0.0165341	19242/22417/16591/100038882	4
Biological process	GO:0050685	positive regulation of mRNA processing	4/494	41/23174	0.011081	0.0314609	0.0165341	15499/70248/268697/12877	4
Biological process	GO:0051154	negative regulation of striated muscle cell differentiation	4/494	41/23174	0.011081	0.0314609	0.0165341	22632/17701/606496/12633	4
Biological process	GO:2000008	regulation of protein localization to cell surface	4/494	41/23174	0.011081	0.0314609	0.0165341	11651/21926/233489/211323	4
Biological process	GO:0006090	pyruvate metabolic process	7/494	114/23174	0.0111768	0.0316575	0.0166374	19017/108099/22059/15194/16833/105787/18597	7
Biological process	GO:0043280	positive regulation of cysteine-type endopeptidase activity involved in apoptotic process	7/494	114/23174	0.0111768	0.0316575	0.0166374	21926/12028/26420/15499/13205/12578/18119	7
Biological process	GO:0043534	blood vessel endothelial cell migration	7/494	114/23174	0.0111768	0.0316575	0.0166374	21803/11651/18591/11350/20683/15507/19229	7
Biological process	GO:0046467	membrane lipid biosynthetic process	7/494	114/23174	0.0111768	0.0316575	0.0166374	56386/53897/57370/56336/13244/22239/14421	7
Biological process	GO:0071331	cellular response to hexose stimulus	8/494	142/23174	0.0113008	0.0319329	0.0167821	83557/17932/18747/20586/20466/11799/105787/330890	8
Biological process	GO:0090288	negative regulation of cellular response to growth factor stimulus	8/494	142/23174	0.0113008	0.0319329	0.0167821	19042/11350/22059/386655/14828/22417/12633/22057	8
Biological process	GO:0106106	cold-induced thermogenesis	8/494	142/23174	0.0113008	0.0319329	0.0167821	19017/20869/54635/15901/15499/14748/22259/53422	8
Biological process	GO:0120161	regulation of cold-induced thermogenesis	8/494	142/23174	0.0113008	0.0319329	0.0167821	19017/20869/54635/15901/15499/14748/22259/53422	8
Biological process	GO:0043409	negative regulation of MAPK cascade	9/494	171/23174	0.0113241	0.0319798	0.0168067	22062/11651/11350/56637/23939/18472/22223/19211/56705	9
Biological process	GO:0046879	hormone secretion	15/494	363/23174	0.0116902	0.0329943	0.0173399	13614/12288/17932/21926/13649/23957/15194/75605/433759/17126/14566/11799/12801/330890/56508	15
Biological process	GO:0002763	positive regulation of myeloid leukocyte differentiation	5/494	64/23174	0.0117315	0.0330142	0.0173504	21803/21926/16476/56637/17311	5
Biological process	GO:0007566	embryo implantation	5/494	64/23174	0.0117315	0.0330142	0.0173504	13852/12317/21849/18119/20181	5
Biological process	GO:0009988	cell-cell recognition	5/494	64/23174	0.0117315	0.0330142	0.0173504	14595/12745/56746/12520/107970	5
Biological process	GO:0050880	regulation of blood vessel size	9/494	172/23174	0.0117319	0.0330142	0.0173504	11548/13614/12288/11651/18591/21926/13649/18159/26395	9
Biological process	GO:0071230	cellular response to amino acid stimulus	9/494	172/23174	0.0117319	0.0330142	0.0173504	21926/54635/224826/13649/13436/14360/15499/13435/12877	9
Biological process	GO:0019233	sensory perception of pain	8/494	143/23174	0.011755	0.0330595	0.0173742	13614/21926/26413/12568/14360/22223/12801/12802	8
Biological process	GO:0050864	regulation of B cell activation	12/494	265/23174	0.0118672	0.0333556	0.0175298	21803/225160/18861/17350/12578/227059/11920/17685/71890/12053/12520/74131	12
Biological process	GO:0007229	integrin-mediated signaling pathway	6/494	89/23174	0.0119501	0.0335491	0.0176315	11350/20779/19242/100038882/22324/19229	6
Biological process	GO:0051492	regulation of stress fiber assembly	6/494	89/23174	0.0119501	0.0335491	0.0176315	11350/242687/16765/22417/21754/18708	6
Biological process	GO:0006110	regulation of glycolytic process	4/494	42/23174	0.0120458	0.033659	0.0176892	19017/108099/22059/105787	4
Biological process	GO:0030811	regulation of nucleotide catabolic process	4/494	42/23174	0.0120458	0.033659	0.0176892	19017/108099/22059/105787	4
Biological process	GO:0030866	cortical actin cytoskeleton organization	4/494	42/23174	0.0120458	0.033659	0.0176892	21926/12568/12317/13605	4
Biological process	GO:0042220	response to cocaine	4/494	42/23174	0.0120458	0.033659	0.0176892	11548/110147/12568/12801	4
Biological process	GO:0070830	bicellular tight junction assembly	4/494	42/23174	0.0120458	0.033659	0.0176892	21926/18747/13605/93742	4
Biological process	GO:0098781	ncRNA transcription	4/494	42/23174	0.0120458	0.033659	0.0176892	22059/12578/20586/671232	4
Biological process	GO:0098927	vesicle-mediated transport between endosomal compartments	4/494	42/23174	0.0120458	0.033659	0.0176892	26413/20779/26395/77116	4
Biological process	GO:1902742	apoptotic process involved in development	4/494	42/23174	0.0120458	0.033659	0.0176892	12028/14595/12578/12649	4
Biological process	GO:1903039	positive regulation of leukocyte cell-cell adhesion	10/494	203/23174	0.0120959	0.0337793	0.0177525	21803/235320/21926/17863/19401/12144/15519/12053/12520/74131	10
Biological process	GO:0035150	regulation of tube size	9/494	173/23174	0.0121506	0.0339122	0.0178223	11548/13614/12288/11651/18591/21926/13649/18159/26395	9
Biological process	GO:0002687	positive regulation of leukocyte migration	8/494	144/23174	0.0122224	0.0340926	0.0179171	13614/21803/26416/22059/17311/19242/12317/19229	8
Biological process	GO:0060326	cell chemotaxis	13/494	299/23174	0.0123888	0.0344791	0.0181202	13614/26416/18591/83964/19242/16590/12317/15507/22324/19229/12802/13052/20496	13
Biological process	GO:0002719	negative regulation of cytokine production involved in immune response	3/494	23/23174	0.0124188	0.0344791	0.0181202	21803/21926/12053	3
Biological process	GO:0010663	positive regulation of striated muscle cell apoptotic process	3/494	23/23174	0.0124188	0.0344791	0.0181202	108058/22059/19211	3
Biological process	GO:0023019	signal transduction involved in regulation of gene expression	3/494	23/23174	0.0124188	0.0344791	0.0181202	17701/17126/17702	3
Biological process	GO:0051580	regulation of neurotransmitter uptake	3/494	23/23174	0.0124188	0.0344791	0.0181202	21926/18000/14573	3
Biological process	GO:0060390	regulation of SMAD protein signal transduction	3/494	23/23174	0.0124188	0.0344791	0.0181202	21803/18119/22057	3
Biological process	GO:0072202	cell differentiation involved in metanephros development	3/494	23/23174	0.0124188	0.0344791	0.0181202	18591/22417/14573	3
Biological process	GO:1903077	negative regulation of protein localization to plasma membrane	3/494	23/23174	0.0124188	0.0344791	0.0181202	21803/18222/233489	3
Biological process	GO:1904018	positive regulation of vasculature development	10/494	204/23174	0.0124861	0.0346033	0.0181855	12189/18591/11350/20683/65255/16590/15507/12633/19229/18119	10
Biological process	GO:0000422	autophagy of mitochondrion	5/494	65/23174	0.0124926	0.0346033	0.0181855	22059/15194/606496/12578/67588	5
Biological process	GO:0060389	pathway-restricted SMAD protein phosphorylation	5/494	65/23174	0.0124926	0.0346033	0.0181855	21803/12155/14566/18119/12164	5
Biological process	GO:0061726	mitochondrion disassembly	5/494	65/23174	0.0124926	0.0346033	0.0181855	22059/15194/606496/12578/67588	5
Biological process	GO:0043535	regulation of blood vessel endothelial cell migration	6/494	90/23174	0.0125804	0.0348262	0.0183026	21803/11651/18591/11350/20683/15507	6
Biological process	GO:0050657	nucleic acid transport	8/494	145/23174	0.0127034	0.035126	0.0184602	225160/21750/66011/20218/15194/15499/83454/12877	8
Biological process	GO:0050658	RNA transport	8/494	145/23174	0.0127034	0.035126	0.0184602	225160/21750/66011/20218/15194/15499/83454/12877	8
Biological process	GO:0007219	Notch signaling pathway	9/494	175/23174	0.0130213	0.0359842	0.0189112	21803/12576/18222/23957/16590/12053/16848/67605/22061	9
Biological process	GO:0010907	positive regulation of glucose metabolic process	4/494	43/23174	0.0130628	0.0359944	0.0189166	11548/11651/20869/20779	4
Biological process	GO:0031057	negative regulation of histone modification	4/494	43/23174	0.0130628	0.0359944	0.0189166	12189/13436/20466/22210	4
Biological process	GO:0032924	activin receptor signaling pathway	4/494	43/23174	0.0130628	0.0359944	0.0189166	14180/17126/50796/18119	4
Biological process	GO:0048854	brain morphogenesis	4/494	43/23174	0.0130628	0.0359944	0.0189166	12558/18472/211651/19211	4
Biological process	GO:0120192	tight junction assembly	4/494	43/23174	0.0130628	0.0359944	0.0189166	21926/18747/13605/93742	4
Biological process	GO:0014909	smooth muscle cell migration	6/494	91/23174	0.0132336	0.0364019	0.0191307	19017/108058/14180/18591/20779/56508	6
Biological process	GO:0060998	regulation of dendritic spine development	6/494	91/23174	0.0132336	0.0364019	0.0191307	12568/50772/13196/18472/19211/211323	6
Biological process	GO:0097061	dendritic spine organization	6/494	91/23174	0.0132336	0.0364019	0.0191307	12568/12540/18472/14360/77116/19211	6
Biological process	GO:0034394	protein localization to cell surface	5/494	66/23174	0.0132865	0.0364632	0.019163	109676/11651/21926/233489/211323	5
Biological process	GO:0046324	regulation of glucose import	5/494	66/23174	0.0132865	0.0364632	0.019163	11651/26416/21926/13982/606496	5
Biological process	GO:0048678	response to axon injury	5/494	66/23174	0.0132865	0.0364632	0.019163	30957/16476/12028/26395/19211	5
Biological process	GO:1903845	negative regulation of cellular response to transforming growth factor beta stimulus	5/494	66/23174	0.0132865	0.0364632	0.019163	19042/22059/386655/14828/12633	5
Biological process	GO:0070663	regulation of leukocyte proliferation	11/494	238/23174	0.0135915	0.0372789	0.0195917	21803/56637/17311/17120/12578/227059/11920/12144/12053/12520/74131	11
Biological process	GO:0003206	cardiac chamber morphogenesis	8/494	147/23174	0.0137068	0.0375706	0.019745	21803/14180/22059/19401/606496/20586/17702/20181	8
Biological process	GO:0097529	myeloid leukocyte migration	10/494	207/23174	0.0137136	0.0375706	0.019745	13614/26416/18591/83964/16590/12520/18795/22324/19229/13052	10
Biological process	GO:0090090	negative regulation of canonical Wnt signaling pathway	7/494	119/23174	0.0139128	0.0380943	0.0200202	12558/26416/20869/56637/433759/71890/14632	7
Biological process	GO:0045922	negative regulation of fatty acid metabolic process	3/494	24/23174	0.0139723	0.0381695	0.0200597	12189/11651/12801	3
Biological process	GO:0046856	phosphatidylinositol dephosphorylation	3/494	24/23174	0.0139723	0.0381695	0.0200597	16330/77116/19211	3
Biological process	GO:1902683	regulation of receptor localization to synapse	3/494	24/23174	0.0139723	0.0381695	0.0200597	56637/26395/56508	3
Biological process	GO:1905208	negative regulation of cardiocyte differentiation	3/494	24/23174	0.0139723	0.0381695	0.0200597	22632/13649/606496	3
Biological process	GO:0043113	receptor clustering	5/494	67/23174	0.0141137	0.0385117	0.0202396	21803/12558/12568/19242/12520	5
Biological process	GO:0097194	execution phase of apoptosis	5/494	67/23174	0.0141137	0.0385117	0.0202396	11651/22059/12028/15499/12578	5
Biological process	GO:0043124	negative regulation of I-kappaB kinase/NF-kappaB signaling	4/494	44/23174	0.014133	0.0385202	0.020244	19042/11350/13982/433759	4
Biological process	GO:0070849	response to epidermal growth factor	4/494	44/23174	0.014133	0.0385202	0.020244	11651/26413/12402/13649	4
Biological process	GO:0030856	regulation of epithelial cell differentiation	8/494	148/23174	0.0142296	0.0387615	0.0203709	21926/12576/18222/15901/17702/18119/14573/22061	8
Biological process	GO:0009914	hormone transport	15/494	372/23174	0.0143272	0.0390049	0.0204987	13614/12288/17932/21926/13649/23957/15194/75605/433759/17126/14566/11799/12801/330890/56508	15
Biological process	GO:0051216	cartilage development	10/494	209/23174	0.0145808	0.0396501	0.0208378	13614/21803/235320/14180/26416/19401/17701/18159/17702/12164	10
Biological process	GO:0060047	heart contraction	10/494	209/23174	0.0145808	0.0396501	0.0208378	109676/108058/11548/13614/12288/12540/22218/606496/18708/13052	10
Biological process	GO:0030510	regulation of BMP signaling pathway	6/494	93/23174	0.0146104	0.0396629	0.0208445	19042/11350/17701/17126/17702/22057	6
Biological process	GO:0043506	regulation of JUN kinase activity	6/494	93/23174	0.0146104	0.0396629	0.0208445	22062/13614/30957/21926/14125/19229	6
Biological process	GO:0045445	myoblast differentiation	6/494	93/23174	0.0146104	0.0396629	0.0208445	21803/26416/21926/22026/18795/18708	6
Biological process	GO:0034612	response to tumor necrosis factor	9/494	179/23174	0.0149007	0.0404277	0.0212465	12189/11651/26416/21926/26413/59004/56449/19229/18033	9
Biological process	GO:1904888	cranial skeletal system development	5/494	68/23174	0.0149748	0.0406057	0.0213401	71175/17126/17702/18119/22061	5
Biological process	GO:0060996	dendritic spine development	7/494	121/23174	0.0151308	0.0410055	0.0215502	12568/12540/50772/13196/18472/19211/211323	7
Biological process	GO:0022409	positive regulation of cell-cell adhesion	11/494	242/23174	0.015214	0.0412074	0.0216563	21803/235320/21926/17863/19401/12144/15519/12053/12520/74131/18119	11
Biological process	GO:0010464	regulation of mesenchymal cell proliferation	4/494	45/23174	0.0152571	0.0412304	0.0216684	14180/19242/16905/22061	4
Biological process	GO:0030890	positive regulation of B cell proliferation	4/494	45/23174	0.0152571	0.0412304	0.0216684	227059/12053/12520/74131	4
Biological process	GO:0032965	regulation of collagen biosynthetic process	4/494	45/23174	0.0152571	0.0412304	0.0216684	21803/18591/18159/22417	4
Biological process	GO:0050974	detection of mechanical stimulus involved in sensory perception	4/494	45/23174	0.0152571	0.0412304	0.0216684	21926/14360/16590/20496	4
Biological process	GO:0030178	negative regulation of Wnt signaling pathway	8/494	150/23174	0.0153186	0.0413704	0.0217419	12558/14180/26416/20869/56637/433759/71890/14632	8
Biological process	GO:0045069	regulation of viral genome replication	6/494	94/23174	0.0153349	0.0413704	0.0217419	21926/18983/13205/21849/100038882/94244	6
Biological process	GO:1902882	regulation of response to oxidative stress	6/494	94/23174	0.0153349	0.0413704	0.0217419	21926/22059/23939/14360/227743/15507	6
Biological process	GO:0002274	myeloid leukocyte activation	10/494	211/23174	0.0154883	0.0417605	0.0219469	21803/21926/16476/16590/11920/12801/18173/14125/22259/12802	10
Biological process	GO:0000289	nuclear-transcribed mRNA poly(A) tail shortening	3/494	25/23174	0.015631	0.0418376	0.0219875	18983/17350/22057	3
Biological process	GO:0014821	phasic smooth muscle contraction	3/494	25/23174	0.015631	0.0418376	0.0219875	13614/16590/14573	3
Biological process	GO:0031440	regulation of mRNA 3'-end processing	3/494	25/23174	0.015631	0.0418376	0.0219875	15499/268697/12877	3
Biological process	GO:0035024	negative regulation of Rho protein signal transduction	3/494	25/23174	0.015631	0.0418376	0.0219875	11548/16765/12053	3
Biological process	GO:0048148	behavioral response to cocaine	3/494	25/23174	0.015631	0.0418376	0.0219875	11548/110147/12568	3
Biological process	GO:0051767	nitric-oxide synthase biosynthetic process	3/494	25/23174	0.015631	0.0418376	0.0219875	13614/26420/12877	3
Biological process	GO:0051769	regulation of nitric-oxide synthase biosynthetic process	3/494	25/23174	0.015631	0.0418376	0.0219875	13614/26420/12877	3
Biological process	GO:0071312	cellular response to alkaloid	3/494	25/23174	0.015631	0.0418376	0.0219875	110147/12144/19361	3
Biological process	GO:0086019	cell-cell signaling involved in cardiac conduction	3/494	25/23174	0.015631	0.0418376	0.0219875	109676/12288/13052	3
Biological process	GO:1902473	regulation of protein localization to synapse	3/494	25/23174	0.015631	0.0418376	0.0219875	56637/26395/56508	3
Biological process	GO:1903747	regulation of establishment of protein localization to mitochondrion	3/494	25/23174	0.015631	0.0418376	0.0219875	606496/12578/105787	3
Biological process	GO:1904376	negative regulation of protein localization to cell periphery	3/494	25/23174	0.015631	0.0418376	0.0219875	21803/18222/233489	3
Biological process	GO:1905809	negative regulation of synapse organization	3/494	25/23174	0.015631	0.0418376	0.0219875	19242/14360/19211	3
Biological process	GO:0032609	interferon-gamma production	7/494	122/23174	0.0157675	0.0421794	0.0221671	26362/21926/11350/19401/18173/100038882/74131	7
Biological process	GO:0006949	syncytium formation	5/494	69/23174	0.0158704	0.0423595	0.0222617	26416/56637/13870/12520/12633	5
Biological process	GO:0007492	endoderm development	5/494	69/23174	0.0158704	0.0423595	0.0222617	21803/433759/81702/17126/18119	5
Biological process	GO:0030808	regulation of nucleotide biosynthetic process	5/494	69/23174	0.0158704	0.0423595	0.0222617	19017/108099/22059/26395/105787	5
Biological process	GO:1900371	regulation of purine nucleotide biosynthetic process	5/494	69/23174	0.0158704	0.0423595	0.0222617	19017/108099/22059/26395/105787	5
Biological process	GO:0045685	regulation of glial cell differentiation	6/494	95/23174	0.0160839	0.0429053	0.0225486	83557/22062/21803/19242/15904/433759	6
Biological process	GO:0007628	adult walking behavior	4/494	46/23174	0.016436	0.0437221	0.0229778	12288/22223/50933/67269	4
Biological process	GO:0030857	negative regulation of epithelial cell differentiation	4/494	46/23174	0.016436	0.0437221	0.0229778	15901/17702/18119/22061	4
Biological process	GO:0035036	sperm-egg recognition	4/494	46/23174	0.016436	0.0437221	0.0229778	14595/12745/56746/107970	4
Biological process	GO:0043029	T cell homeostasis	4/494	46/23174	0.016436	0.0437221	0.0229778	21803/11651/12028/14605	4
Biological process	GO:0090199	regulation of release of cytochrome c from mitochondria	4/494	46/23174	0.016436	0.0437221	0.0229778	11651/22059/12028/16905	4
Biological process	GO:0002696	positive regulation of leukocyte activation	17/494	448/23174	0.0164451	0.0437221	0.0229778	21803/235320/26362/17863/19401/18861/17350/227059/17685/71890/12144/15519/56746/12053/12520/14125/74131	17
Biological process	GO:0006457	protein folding	8/494	152/23174	0.0164668	0.0437554	0.0229953	14828/18159/12317/12745/15519/15512/15507/94244	8
Biological process	GO:0032412	regulation of ion transmembrane transporter activity	11/494	245/23174	0.0165233	0.0438812	0.0230614	109676/19017/108058/100986/22218/15194/15512/18795/19211/19417/19229	11
Biological process	GO:0046173	polyol biosynthetic process	5/494	70/23174	0.0168009	0.044544	0.0234098	114875/16867/18795/19229/17171	5
Biological process	GO:0048641	regulation of skeletal muscle tissue development	5/494	70/23174	0.0168009	0.044544	0.0234098	21803/232174/14605/56449/105787	5
Biological process	GO:0051193	regulation of cofactor metabolic process	5/494	70/23174	0.0168009	0.044544	0.0234098	19017/108099/22059/14360/105787	5
Biological process	GO:0061351	neural precursor cell proliferation	9/494	183/23174	0.0169727	0.0449742	0.0236359	21803/12558/22059/18222/19242/18472/15904/12316/21335	9
Biological process	GO:0042303	molting cycle	7/494	124/23174	0.0170975	0.0452547	0.0237833	71175/21926/13649/13039/433759/17702/22061	7
Biological process	GO:0042633	hair cycle	7/494	124/23174	0.0170975	0.0452547	0.0237833	71175/21926/13649/13039/433759/17702/22061	7
Biological process	GO:0009299	mRNA transcription	3/494	26/23174	0.0173957	0.045815	0.0240777	22059/20683/15499	3
Biological process	GO:0010829	negative regulation of glucose transmembrane transport	3/494	26/23174	0.0173957	0.045815	0.0240777	21926/13982/606496	3
Biological process	GO:0016577	histone demethylation	3/494	26/23174	0.0173957	0.045815	0.0240777	20592/75605/22210	3
Biological process	GO:0032801	receptor catabolic process	3/494	26/23174	0.0173957	0.045815	0.0240777	21803/12568/77116	3
Biological process	GO:0048642	negative regulation of skeletal muscle tissue development	3/494	26/23174	0.0173957	0.045815	0.0240777	21803/14605/56449	3
Biological process	GO:0051123	RNA polymerase II preinitiation complex assembly	3/494	26/23174	0.0173957	0.045815	0.0240777	22059/21374/13982	3
Biological process	GO:0061436	establishment of skin barrier	3/494	26/23174	0.0173957	0.045815	0.0240777	232174/16765/22061	3
Biological process	GO:0070076	histone lysine demethylation	3/494	26/23174	0.0173957	0.045815	0.0240777	20592/75605/22210	3
Biological process	GO:0099010	modification of postsynaptic structure	3/494	26/23174	0.0173957	0.045815	0.0240777	56637/12540/77579	3
Biological process	GO:0031503	protein-containing complex localization	11/494	247/23174	0.0174419	0.0459114	0.0241284	225160/56637/21750/18222/23969/13436/26395/110350/83454/11799/56508	11
Biological process	GO:0006334	nucleosome assembly	6/494	97/23174	0.0176569	0.0463733	0.0243712	56086/22589/20586/171506/68231/107970	6
Biological process	GO:0043502	regulation of muscle adaptation	6/494	97/23174	0.0176569	0.0463733	0.0243712	108058/13614/22632/56637/606496/16905	6
Biological process	GO:0045638	negative regulation of myeloid cell differentiation	6/494	97/23174	0.0176569	0.0463733	0.0243712	235320/19401/99375/76044/18708/19229	6
Biological process	GO:0006368	transcription elongation from RNA polymerase II promoter	4/494	47/23174	0.0176704	0.0463733	0.0243712	70238/58230/57261/26395	4
Biological process	GO:0045907	positive regulation of vasoconstriction	4/494	47/23174	0.0176704	0.0463733	0.0243712	11548/11651/18591/13649	4
Biological process	GO:0014013	regulation of gliogenesis	8/494	154/23174	0.0176758	0.0463733	0.0243712	83557/22062/21803/12558/21926/19242/15904/433759	8
Biological process	GO:0042733	embryonic digit morphogenesis	5/494	71/23174	0.017767	0.0465615	0.0244701	235320/12028/17701/433759/17702	5
Biological process	GO:0051851	modification by host of symbiont morphology or physiology	5/494	71/23174	0.017767	0.0465615	0.0244701	16476/20683/230908/433759/20586	5
Biological process	GO:0032273	positive regulation of protein polymerization	7/494	125/23174	0.0177913	0.0465996	0.0244901	17755/12576/56378/434204/54418/15519/19229	7
Biological process	GO:0002315	marginal zone B cell differentiation	2/494	10/23174	0.0182214	0.0472587	0.0248365	16848/19229	2
Biological process	GO:0002318	myeloid progenitor cell differentiation	2/494	10/23174	0.0182214	0.0472587	0.0248365	83964/16590	2
Biological process	GO:0010958	regulation of amino acid import across plasma membrane	2/494	10/23174	0.0182214	0.0472587	0.0248365	21926/18000	2
Biological process	GO:0019374	galactolipid metabolic process	2/494	10/23174	0.0182214	0.0472587	0.0248365	53897/57370	2
Biological process	GO:0021873	forebrain neuroblast division	2/494	10/23174	0.0182214	0.0472587	0.0248365	18222/12316	2
Biological process	GO:0030853	negative regulation of granulocyte differentiation	2/494	10/23174	0.0182214	0.0472587	0.0248365	19401/99375	2
Biological process	GO:0031620	regulation of fever generation	2/494	10/23174	0.0182214	0.0472587	0.0248365	21926/12801	2
Biological process	GO:0033314	mitotic DNA replication checkpoint	2/494	10/23174	0.0182214	0.0472587	0.0248365	235559/23834	2
Biological process	GO:0060513	prostatic bud formation	2/494	10/23174	0.0182214	0.0472587	0.0248365	11835/22061	2
Biological process	GO:0070673	response to interleukin-18	2/494	10/23174	0.0182214	0.0472587	0.0248365	11651/18591	2
Biological process	GO:0090435	protein localization to nuclear envelope	2/494	10/23174	0.0182214	0.0472587	0.0248365	22218/18817	2
Biological process	GO:0099004	calmodulin dependent kinase signaling pathway	2/494	10/23174	0.0182214	0.0472587	0.0248365	15194/105787	2
Biological process	GO:0099541	trans-synaptic signaling by lipid	2/494	10/23174	0.0182214	0.0472587	0.0248365	12801/18795	2
Biological process	GO:0099542	trans-synaptic signaling by endocannabinoid	2/494	10/23174	0.0182214	0.0472587	0.0248365	12801/18795	2
Biological process	GO:1900038	negative regulation of cellular response to hypoxia	2/494	10/23174	0.0182214	0.0472587	0.0248365	26395/110213	2
Biological process	GO:1900103	positive regulation of endoplasmic reticulum unfolded protein response	2/494	10/23174	0.0182214	0.0472587	0.0248365	12028/18708	2
Biological process	GO:1903749	positive regulation of establishment of protein localization to mitochondrion	2/494	10/23174	0.0182214	0.0472587	0.0248365	606496/105787	2
Biological process	GO:1904526	regulation of microtubule binding	2/494	10/23174	0.0182214	0.0472587	0.0248365	11350/15499	2
Biological process	GO:0050708	regulation of protein secretion	18/494	489/23174	0.0182399	0.0472808	0.0248481	13121/21803/17932/26416/21926/11350/20779/13649/23957/77579/269800/433759/110213/11799/12801/330890/22259/56508	18
Biological process	GO:0009152	purine ribonucleotide biosynthetic process	10/494	217/23174	0.018463	0.0478073	0.0251248	19017/21803/108099/22059/18159/230103/26395/16833/105787/18597	10
Biological process	GO:0030258	lipid modification	10/494	217/23174	0.018463	0.0478073	0.0251248	19017/11651/26416/16330/77116/105787/12801/19211/18708/14421	10
Biological process	GO:0043627	response to estrogen	5/494	72/23174	0.0187691	0.0485471	0.0255136	12189/26413/19401/13982/381022	5
Biological process	GO:0048645	animal organ formation	5/494	72/23174	0.0187691	0.0485471	0.0255136	26413/11835/26395/14573/22061	5
Biological process	GO:0007162	negative regulation of cell adhesion	12/494	283/23174	0.0189437	0.0489109	0.0257048	21803/11651/11350/20779/17120/23939/12578/26395/71890/12053/19211/18708	12
Biological process	GO:0007520	myoblast fusion	4/494	48/23174	0.0189611	0.0489109	0.0257048	26416/56637/12520/12633	4
Biological process	GO:0070534	protein K63-linked ubiquitination	4/494	48/23174	0.0189611	0.0489109	0.0257048	70238/58230/12578/22210	4
Biological process	GO:0090659	walking behavior	4/494	48/23174	0.0189611	0.0489109	0.0257048	12288/22223/50933/67269	4
Biological process	GO:0120193	tight junction organization	4/494	48/23174	0.0189611	0.0489109	0.0257048	21926/18747/13605/93742	4
Biological process	GO:0048640	negative regulation of developmental growth	7/494	127/23174	0.019238	0.0494589	0.0259928	22062/22632/12576/12568/606496/19211/13052	7
Biological process	GO:0051592	response to calcium ion	7/494	127/23174	0.019238	0.0494589	0.0259928	16476/66722/13649/15194/233908/13605/105787	7
Biological process	GO:0050870	positive regulation of T cell activation	9/494	187/23174	0.0192477	0.0494589	0.0259928	21803/235320/17863/19401/12144/15519/12053/12520/74131	9
Biological process	GO:0030212	hyaluronan metabolic process	3/494	27/23174	0.0192669	0.0494589	0.0259928	21803/18591/18033	3
Biological process	GO:0032069	regulation of nuclease activity	3/494	27/23174	0.0192669	0.0494589	0.0259928	11651/21750/110213	3
Biological process	GO:0036003	positive regulation of transcription from RNA polymerase II promoter in response to stress	3/494	27/23174	0.0192669	0.0494589	0.0259928	22059/23939/15499	3
Biological process	GO:0050849	negative regulation of calcium-mediated signaling	3/494	27/23174	0.0192669	0.0494589	0.0259928	56637/16438/23939	3
Biological process	GO:0061311	cell surface receptor signaling pathway involved in heart development	3/494	27/23174	0.0192669	0.0494589	0.0259928	21803/17701/17702	3
Biological process	GO:0070050	neuron cellular homeostasis	3/494	27/23174	0.0192669	0.0494589	0.0259928	22174/105787/12801	3
Cellular component	GO:0000793	condensed chromosome	68/495	208/23407	6.50301e-62	3.40107e-59	2.51222e-59	19355/12189/19357/22589/18970/232811/21976/67949/57261/66140/217716/218914/17687/54427/17350/211651/66468/13018/226026/17535/219114/56739/12566/67241/75828/16319/15270/75033/20877/72415/235559/68298/18817/12144/67052/12649/71846/76044/239083/55993/70385/15512/68549/13404/75514/75459/11799/83558/12190/19361/268697/18005/20878/12236/74075/50878/67981/320558/140557/20957/66654/20962/20843/223697/942…	68
Cellular component	GO:0000794	condensed nuclear chromosome	55/495	155/23407	2.27626e-52	5.95241e-50	4.39677e-50	19355/12189/19357/22589/18970/232811/67949/57261/217716/218914/17687/54427/17350/17535/56739/75828/16319/15270/75033/20877/72415/235559/68298/18817/12144/67052/12649/71846/239083/55993/15512/68549/13404/75514/75459/83558/12190/19361/268697/18005/20878/12236/74075/50878/67981/320558/140557/20957/66654/20962/223697/94244/668929/384619/107970	55
Cellular component	GO:0098687	chromosomal region	69/495	298/23407	1.92297e-51	3.35238e-49	2.47625e-49	50505/225160/26931/19357/21750/17120/22589/13870/58230/232811/12412/29871/18472/66140/13436/12237/15499/13435/66468/13018/14375/226026/17535/219114/56739/52864/12566/11920/228421/22594/67773/20937/67241/64707/20466/16319/73804/15270/20877/72415/15201/68298/18817/12144/67052/12649/26972/70385/68549/13404/11799/12190/19361/268697/18005/20878/12236/50878/71988/140557/20957/20962/67117/18000/20843/22…	69
Cellular component	GO:0005819	spindle	52/495	272/23407	2.27072e-34	2.95989e-32	2.18633e-32	218294/11651/54204/26416/17120/216166/18970/77579/12412/18472/66140/99412/15499/66468/54418/17997/219114/74237/12531/11920/228421/16319/12316/76123/218977/12545/71890/74187/20877/72415/18817/12534/72119/23834/67141/70385/15512/13605/21335/11799/268697/18005/12877/105988/20878/12236/67117/229776/18000/20843/93742/384619	52
Cellular component	GO:0000775	chromosome, centromeric region	45/495	189/23407	2.82972e-34	2.95989e-32	2.18633e-32	26931/19357/17120/22589/232811/12412/18472/66140/13436/12237/15499/13435/66468/13018/219114/56739/228421/67773/20937/64707/20466/16319/73804/20877/72415/15201/68298/18817/67052/70385/68549/11799/268697/18005/20878/12236/50878/71988/140557/20957/20962/67117/18000/20843/68231	45
Cellular component	GO:0000795	synaptonemal complex	32/495	94/23407	3.70277e-30	2.7665e-28	2.04348e-28	12189/18970/217716/218914/17687/17350/56739/75828/16319/75033/18817/12144/71846/239083/55993/15512/75514/75459/83558/12190/19361/74075/50878/67981/320558/140557/20957/66654/20962/94244/668929/384619	32
Cellular component	GO:0099086	synaptonemal structure	32/495	94/23407	3.70277e-30	2.7665e-28	2.04348e-28	12189/18970/217716/218914/17687/17350/56739/75828/16319/75033/18817/12144/71846/239083/55993/15512/75514/75459/83558/12190/19361/74075/50878/67981/320558/140557/20957/66654/20962/94244/668929/384619	32
Cellular component	GO:0000800	lateral element	14/495	17/23407	1.91429e-21	1.25147e-19	9.24403e-20	12189/56739/16319/75033/12144/12190/19361/50878/320558/140557/20957/20962/668929/384619	14
Cellular component	GO:0043073	germ cell nucleus	16/495	29/23407	6.63376e-20	3.85495e-18	2.84747e-18	21750/217716/17350/56739/17450/15270/69716/235559/12144/171506/15512/20878/50878/20957/20962/16875	16
Cellular component	GO:0000790	nuclear chromatin	45/495	404/23407	7.58362e-20	3.96623e-18	2.92967e-18	71175/19017/110147/16476/22632/22059/211064/20683/19401/22589/11835/21374/19763/13982/232811/57261/69260/13436/54427/433759/13435/17126/17535/52864/22594/67773/20937/64707/20586/21849/20466/15270/22702/19362/18140/19361/71988/18795/22259/20181/22061/22210/68231/328440/107970	45
Cellular component	GO:0000781	chromosome, telomeric region	25/495	110/23407	5.11755e-19	2.43316e-17	1.79726e-17	50505/225160/21750/22589/13870/58230/12412/14375/226026/17535/52864/12566/11920/22594/67241/15270/12144/12649/26972/13404/12190/19361/223697/19364/384619	25
Cellular component	GO:0000792	heterochromatin	23/495	95/23407	2.91038e-18	1.26844e-16	9.3694e-17	22589/22218/19763/232811/12412/13436/54427/433759/15499/13435/12578/12416/20937/64707/20586/21849/16319/15361/15201/18140/71988/22210/68231	23
Cellular component	GO:0000779	condensed chromosome, centromeric region	18/495	50/23407	5.09509e-18	2.04979e-16	1.51409e-16	22589/232811/66140/66468/219114/56739/20877/72415/68298/18817/67052/70385/68549/11799/268697/20878/12236/20962	18
Cellular component	GO:0000922	spindle pole	25/495	128/23407	2.48675e-17	9.2898e-16	6.86194e-16	218294/26416/17120/216166/99412/15499/17997/74237/12531/12316/76123/218977/74187/20877/72415/18817/72119/23834/70385/268697/18005/20878/229776/20843/384619	25
Cellular component	GO:0000776	kinetochore	25/495	130/23407	3.6726e-17	1.28051e-15	9.45856e-16	17120/18472/66140/12237/15499/66468/219114/56739/228421/67773/20466/16319/73804/20877/72415/18817/67052/70385/68549/11799/268697/18005/12236/67117/18000	25
Cellular component	GO:0001673	male germ cell nucleus	13/495	22/23407	6.05396e-17	1.97889e-15	1.46171e-15	21750/217716/17350/56739/17450/15270/69716/235559/12144/15512/50878/20957/20962	13
Cellular component	GO:1990391	DNA repair complex	14/495	37/23407	1.16715e-14	3.59071e-13	2.65229e-13	50505/70238/19359/13870/217716/18861/17687/17350/14375/52864/11920/22594/17685/55993	14
Cellular component	GO:0000803	sex chromosome	14/495	39/23407	2.7734e-14	8.05827e-13	5.95227e-13	22218/19763/80720/13435/226026/12566/67241/15270/58186/71241/75514/71988/98558/22210	14
Cellular component	GO:0000780	condensed nuclear chromosome, centromeric region	12/495	29/23407	2.62508e-13	7.22588e-12	5.33742e-12	22589/232811/56739/20877/72415/18817/67052/68549/268697/20878/12236/20962	12
Cellular component	GO:0072686	mitotic spindle	19/495	107/23407	1.04871e-12	2.74237e-11	2.02566e-11	218294/17120/99412/15499/66468/228421/12316/76123/12545/20877/12534/72119/13605/21335/105988/20878/67117/229776/20843	19
Cellular component	GO:0005876	spindle microtubule	14/495	53/23407	3.3712e-12	8.3959e-11	6.20166e-11	18970/18472/66140/66468/219114/228421/20877/18817/12534/72119/11799/20878/67117/18000	14
Cellular component	GO:0001741	XY body	10/495	21/23407	4.68047e-12	1.11268e-10	8.21882e-11	22218/80720/13435/15270/58186/71241/75514/71988/98558/22210	10
Cellular component	GO:0008278	cohesin complex	8/495	12/23407	1.73812e-11	3.95233e-10	2.9194e-10	19357/218914/56739/68549/50878/140557/20843/668929	8
Cellular component	GO:0000940	condensed chromosome outer kinetochore	8/495	14/23407	1.01584e-10	2.21368e-09	1.63514e-09	66140/66468/219114/18817/67052/70385/268697/12236	8
Cellular component	GO:0016605	PML body	14/495	73/23407	3.52259e-10	7.36927e-09	5.44333e-09	170930/235320/22059/22589/22218/22196/23939/15499/226026/17535/67241/235559/12144/19361	14
Cellular component	GO:0005874	microtubule	32/495	419/23407	4.60771e-10	9.26858e-09	6.84627e-09	12799/17755/12568/56637/18970/434204/18472/66140/606496/99412/66468/26395/110350/19256/219114/74237/228421/16765/16319/12316/73804/74187/20877/18817/12534/72119/11799/18005/20878/67117/18000/52004	32
Cellular component	GO:0000784	nuclear chromosome, telomeric region	14/495	75/23407	5.13922e-10	9.95487e-09	7.3532e-09	50505/225160/21750/22589/13870/12412/14375/17535/52864/22594/12190/19361/223697/19364	14
Cellular component	GO:0005720	nuclear heterochromatin	11/495	43/23407	1.05788e-09	1.97597e-08	1.45955e-08	22589/19763/232811/13436/54427/13435/20937/64707/21849/18140/71988	11
Cellular component	GO:0000777	condensed chromosome kinetochore	10/495	34/23407	1.35951e-09	2.4518e-08	1.81103e-08	66140/66468/219114/56739/18817/67052/70385/11799/268697/12236	10
Cellular component	GO:0000791	euchromatin	11/495	46/23407	2.31706e-09	4.03942e-08	2.98373e-08	19017/16476/211064/21374/15499/13435/12416/20586/21849/18140/107970	11
Cellular component	GO:0005657	replication fork	13/495	71/23407	2.75004e-09	4.63958e-08	3.42705e-08	22059/52915/71702/17535/15270/58186/114714/18140/12144/12649/12053/22210/19364	13
Cellular component	GO:0072687	meiotic spindle	7/495	14/23407	5.47399e-09	8.94655e-08	6.6084e-08	54204/12316/67141/15512/12877/20878/384619	7
Cellular component	GO:0045120	pronucleus	8/495	23/23407	1.4025e-08	2.22275e-07	1.64184e-07	114875/21374/12412/15499/68298/12144/12428/20878	8
Cellular component	GO:0000151	ubiquitin ligase complex	23/495	283/23407	4.30411e-08	6.62073e-07	4.89043e-07	21402/12189/103583/30945/224826/70238/22195/65247/19763/58230/68999/99375/65255/56371/12234/12416/20437/71890/58186/66197/107995/22210/56705	23
Cellular component	GO:0090734	site of DNA damage	11/495	64/23407	9.16456e-08	1.36945e-06	1.01155e-06	22059/70238/58230/12412/226026/17535/67241/15270/58186/19361/71988	11
Cellular component	GO:0035861	site of double-strand break	10/495	51/23407	9.59983e-08	1.39464e-06	1.03016e-06	22059/70238/58230/226026/17535/67241/15270/58186/19361/71988	10
Cellular component	GO:0000307	cyclin-dependent protein kinase holoenzyme complex	9/495	42/23407	1.88674e-07	2.66693e-06	1.96994e-06	12567/57261/12427/12566/12534/12428/268697/66197/18647	9
Cellular component	GO:1902911	protein kinase complex	13/495	101/23407	2.17006e-07	2.98669e-06	2.20613e-06	12567/108099/12568/57261/18747/12427/12566/12534/12428/268697/66197/105787/18647	13
Cellular component	GO:0061695	transferase complex, transferring phosphorus-containing groups	20/495	244/23407	2.8578e-07	3.83239e-06	2.83081e-06	12567/50505/108099/22059/12568/13870/21374/57261/18747/12427/12566/71890/12534/72504/12428/268697/66197/105787/18647/18708	20
Cellular component	GO:0005667	transcription factor complex	27/495	417/23407	3.16165e-07	4.13386e-06	3.05349e-06	12567/50505/16476/22632/22059/19401/17701/13870/21374/14536/69260/433759/84113/14375/17126/18044/12566/18291/21849/20466/22702/15361/26910/72504/22259/17702/20181	27
Cellular component	GO:0035770	ribonucleoprotein granule	18/495	204/23407	3.80534e-07	4.85413e-06	3.58552e-06	83557/15568/22218/16211/18861/15194/18983/15499/13205/74203/74691/57749/74068/83456/98558/330890/76850/378430	18
Cellular component	GO:0005721	pericentric heterochromatin	7/495	24/23407	4.59437e-07	5.72108e-06	4.2259e-06	22589/232811/12412/16319/15201/71988/68231	7
Cellular component	GO:0030496	midbody	14/495	139/23407	1.5643e-06	1.90263e-05	1.40538e-05	54204/14828/77579/13852/16319/12316/74187/20877/18817/12534/13605/11799/18005/18000	14
Cellular component	GO:0030426	growth cone	17/495	203/23407	1.65348e-06	1.96539e-05	1.45174e-05	17755/11350/12568/56637/12402/77579/56378/18472/74187/15519/12877/12801/19417/19229/56508/13052/93742	17
Cellular component	GO:0097431	mitotic spindle pole	7/495	29/23407	1.89049e-06	2.19717e-05	1.62295e-05	17120/15499/12316/76123/20877/20878/20843	7
Cellular component	GO:0030427	site of polarized growth	17/495	206/23407	2.02283e-06	2.29987e-05	1.69881e-05	17755/11350/12568/56637/12402/77579/56378/18472/74187/15519/12877/12801/19417/19229/56508/13052/93742	17
Cellular component	GO:0005635	nuclear envelope	25/495	409/23407	2.44725e-06	2.72322e-05	2.01151e-05	76407/11548/16646/12567/67030/12028/16438/17120/22218/22196/16211/66011/18472/22174/56371/81702/77053/12317/83454/12745/78284/16905/16649/223697/384619	25
Cellular component	GO:0016363	nuclear matrix	11/495	88/23407	2.49954e-06	2.72346e-05	2.01169e-05	22632/22059/19357/68479/13435/59004/67773/18140/12144/16905/20843	11
Cellular component	GO:0036464	cytoplasmic ribonucleoprotein granule	16/495	193/23407	3.79915e-06	4.05501e-05	2.99525e-05	83557/15568/16211/18861/15194/18983/13205/74203/74691/57749/74068/83456/98558/330890/76850/378430	16
Cellular component	GO:0000109	nucleotide-excision repair complex	5/495	13/23407	4.63666e-06	4.84995e-05	3.58243e-05	50505/19359/13870/52864/22594	5
Cellular component	GO:0090575	RNA polymerase II transcription factor complex	14/495	160/23407	8.20965e-06	8.41892e-05	6.21866e-05	50505/16476/22059/19401/13870/21374/69260/17126/18044/21849/15361/72504/22259/20181	14
Cellular component	GO:0034399	nuclear periphery	12/495	119/23407	8.57482e-06	8.62429e-05	6.37036e-05	22632/22059/19357/16211/68479/13435/59004/67773/18140/12144/16905/20843	12
Cellular component	GO:0005719	nuclear euchromatin	7/495	36/23407	8.89595e-06	8.66976e-05	6.40395e-05	19017/16476/211064/21374/20586/21849/107970	7
Cellular component	GO:1902554	serine/threonine protein kinase complex	10/495	82/23407	8.95157e-06	8.66976e-05	6.40395e-05	12567/12568/57261/12427/12566/12534/12428/268697/66197/18647	10
Cellular component	GO:0098984	neuron to neuron synapse	24/495	416/23407	1.0276e-05	9.7715e-05	7.21775e-05	109676/17755/12288/16646/12558/26413/20779/12568/30945/228998/56637/16438/18222/233489/100986/23969/15194/14360/26395/77116/12877/15507/19229/56508	24
Cellular component	GO:0014069	postsynaptic density	23/495	389/23407	1.05824e-05	9.88319e-05	7.30025e-05	109676/17755/12288/16646/12558/26413/20779/12568/228998/56637/16438/18222/233489/100986/23969/15194/14360/26395/77116/12877/15507/19229/56508	23
Cellular component	GO:0032279	asymmetric synapse	23/495	392/23407	1.19725e-05	0.000109853	8.11434e-05	109676/17755/12288/16646/12558/26413/20779/12568/228998/56637/16438/18222/233489/100986/23969/15194/14360/26395/77116/12877/15507/19229/56508	23
Cellular component	GO:0000778	condensed nuclear chromosome kinetochore	5/495	16/23407	1.49305e-05	0.000125946	9.30306e-05	56739/18817/67052/268697/12236	5
Cellular component	GO:0010369	chromocenter	5/495	16/23407	1.49305e-05	0.000125946	9.30306e-05	12412/29871/16319/20877/71988	5
Cellular component	GO:0043186	P granule	5/495	16/23407	1.49305e-05	0.000125946	9.30306e-05	74691/74068/83456/98558/330890	5
Cellular component	GO:0045495	pole plasm	5/495	16/23407	1.49305e-05	0.000125946	9.30306e-05	74691/74068/83456/98558/330890	5
Cellular component	GO:0060293	germ plasm	5/495	16/23407	1.49305e-05	0.000125946	9.30306e-05	74691/74068/83456/98558/330890	5
Cellular component	GO:0044798	nuclear transcription factor complex	15/495	202/23407	2.81779e-05	0.000233921	0.000172787	50505/16476/22059/19401/13870/21374/69260/84113/17126/18044/21849/15361/72504/22259/20181	15
Cellular component	GO:0000152	nuclear ubiquitin ligase complex	7/495	43/23407	3.02214e-05	0.000246965	0.000182422	12189/19763/68999/56371/12416/71890/107995	7
Cellular component	GO:0033267	axon part	24/495	446/23407	3.18983e-05	0.000256659	0.000189582	108058/17755/30957/11350/12568/56637/12402/77579/13982/56378/23969/18472/74187/72119/15519/12877/20878/12801/19417/19229/56508/13052/93742/211323	24
Cellular component	GO:0099572	postsynaptic specialization	23/495	428/23407	4.74056e-05	0.000375654	0.000277478	109676/17755/12288/16646/12558/26413/20779/12568/228998/56637/16438/18222/233489/100986/23969/15194/14360/26395/77116/12877/15507/19229/56508	23
Cellular component	GO:0043209	myelin sheath	15/495	213/23407	5.19737e-05	0.000405705	0.000299675	12799/12540/14828/83964/140559/23969/22223/22187/15519/15512/18597/18795/19211/18000/93742	15
Cellular component	GO:0034992	microtubule organizing center attachment site	4/495	11/23407	5.79475e-05	0.000426852	0.000315296	76407/77053/223697/384619	4
Cellular component	GO:0034993	meiotic nuclear membrane microtubule tethering complex	4/495	11/23407	5.79475e-05	0.000426852	0.000315296	76407/77053/223697/384619	4
Cellular component	GO:0106083	nuclear membrane protein complex	4/495	11/23407	5.79475e-05	0.000426852	0.000315296	76407/77053/223697/384619	4
Cellular component	GO:0106094	nuclear membrane microtubule tethering complex	4/495	11/23407	5.79475e-05	0.000426852	0.000315296	76407/77053/223697/384619	4
Cellular component	GO:0005818	aster	4/495	12/23407	8.54693e-05	0.000620839	0.000458585	18472/228421/72119/67117	4
Cellular component	GO:0045121	membrane raft	20/495	364/23407	0.000108278	0.000775744	0.000573006	12288/12558/21926/26413/20779/56637/16438/12402/13649/13852/18747/14360/228421/56746/16890/12801/12633/14125/19229/13052	20
Cellular component	GO:0098857	membrane microdomain	20/495	365/23407	0.000112356	0.000794086	0.000586555	12288/12558/21926/26413/20779/56637/16438/12402/13649/13852/18747/14360/228421/56746/16890/12801/12633/14125/19229/13052	20
Cellular component	GO:0098589	membrane region	20/495	377/23407	0.000173009	0.00120645	0.000891147	12288/12558/21926/26413/20779/56637/16438/12402/13649/13852/18747/14360/228421/56746/16890/12801/12633/14125/19229/13052	20
Cellular component	GO:0150034	distal axon	19/495	369/23407	0.000362087	0.00249173	0.00184053	17755/11350/12568/56637/12402/77579/13982/56378/23969/18472/74187/15519/12877/12801/19417/19229/56508/13052/93742	19
Cellular component	GO:0016607	nuclear speck	17/495	317/23407	0.000460255	0.00312614	0.00230914	235320/110147/26416/225160/11835/14105/18747/71702/18983/68479/11614/226026/15270/76044/105787/18795/17702	17
Cellular component	GO:0031519	PcG protein complex	6/495	48/23407	0.000501553	0.00336298	0.00248408	21402/22632/19763/54427/12416/22702	6
Cellular component	GO:0031965	nuclear membrane	14/495	238/23407	0.000583292	0.00385697	0.00284897	76407/11548/12567/16438/22218/16211/56371/81702/77053/78284/16905/16649/223697/384619	14
Cellular component	GO:0031461	cullin-RING ubiquitin ligase complex	11/495	159/23407	0.000589977	0.00385697	0.00284897	21402/103583/68999/99375/65255/56371/12234/20437/71890/66197/107995	11
Cellular component	GO:0051233	spindle midzone	5/495	34/23407	0.000694957	0.00448719	0.00331448	228421/20877/18817/23834/20878	5
Cellular component	GO:0005680	anaphase-promoting complex	4/495	21/23407	0.00088851	0.00566696	0.00418592	68999/56371/71890/107995	4
Cellular component	GO:0005669	transcription factor TFIID complex	5/495	36/23407	0.000909459	0.00573069	0.00423299	50505/22059/13870/21374/72504	5
Cellular component	GO:0005844	polysome	7/495	74/23407	0.000961593	0.00598706	0.00442236	83557/13164/77579/233908/11614/12317/53422	7
Cellular component	GO:0005875	microtubule associated complex	10/495	147/23407	0.00117614	0.00723673	0.00534543	17755/18472/110350/228421/73804/74187/20877/11799/20878/67117	10
Cellular component	GO:0000235	astral microtubule	3/495	11/23407	0.00136669	0.00831137	0.00613922	18472/228421/67117	3
Cellular component	GO:0042555	MCM complex	3/495	12/23407	0.00179376	0.0107832	0.00796504	71567/66634/240697	3
Cellular component	GO:0097440	apical dendrite	4/495	26/23407	0.00204163	0.0121338	0.00896266	19017/17755/19417/19229	4
Cellular component	GO:0032993	protein-DNA complex	11/495	186/23407	0.00210439	0.0123662	0.00913437	21750/20683/21374/13982/71702/14375/18044/15270/171506/68231/107970	11
Cellular component	GO:0016580	Sin3 complex	3/495	13/23407	0.00229547	0.0133392	0.00985307	69260/433759/20466	3
Cellular component	GO:0043204	perikaryon	9/495	137/23407	0.00259141	0.0148935	0.0110011	17755/12724/26413/26420/13039/13982/233908/26395/15507	9
Cellular component	GO:0031588	nucleotide-activated protein kinase complex	3/495	14/23407	0.00287593	0.016349	0.0120763	108099/18747/105787	3
Cellular component	GO:0019005	SCF ubiquitin ligase complex	6/495	67/23407	0.00291274	0.0163802	0.0120993	21402/103583/99375/12234/20437/66197	6
Cellular component	GO:0005911	cell-cell junction	20/495	475/23407	0.00295011	0.0164139	0.0121242	109676/108058/11548/12558/11651/12567/242687/12540/83964/14612/13852/14595/16590/56449/13605/14619/18708/22324/13052/93742	20
Cellular component	GO:0031252	cell leading edge	17/495	380/23407	0.0032261	0.0177605	0.0131189	30957/12558/11350/20779/12568/17311/242687/12540/77579/56378/23969/18472/13852/228421/15519/19229/211323	17
Cellular component	GO:0016323	basolateral plasma membrane	12/495	227/23407	0.00340802	0.0185666	0.0137143	12558/18591/18222/13649/13852/14595/15519/12520/19417/56508/13052/20496	12
Cellular component	GO:0032156	septin cytoskeleton	3/495	15/23407	0.00353889	0.0188861	0.0139503	54204/50772/18000	3
Cellular component	GO:0043220	Schmidt-Lanterman incisure	3/495	15/23407	0.00353889	0.0188861	0.0139503	83964/19211/93742	3
Cellular component	GO:0030315	T-tubule	6/495	70/23407	0.00362967	0.0191749	0.0141636	109676/108058/11548/12288/12558/13982	6
Cellular component	GO:0031594	neuromuscular junction	7/495	97/23407	0.00453914	0.0237397	0.0175354	108058/12568/19242/77579/18747/13052/211323	7
Cellular component	GO:0044853	plasma membrane raft	8/495	123/23407	0.00468075	0.0242379	0.0179034	12288/12558/26413/20779/12402/18747/228421/16890	8
Cellular component	GO:0005847	mRNA cleavage and polyadenylation specificity factor complex	3/495	17/23407	0.0051256	0.0260261	0.0192243	83410/74320/108062	3
Cellular component	GO:0070822	Sin3-type complex	3/495	17/23407	0.0051256	0.0260261	0.0192243	69260/433759/20466	3
Cellular component	GO:0005790	smooth endoplasmic reticulum	4/495	36/23407	0.00681357	0.0342644	0.0253095	30957/16438/14828/12317	4
Cellular component	GO:0005849	mRNA cleavage factor complex	3/495	19/23407	0.00707897	0.0349273	0.0257992	83410/74320/108062	3
Cellular component	GO:0043218	compact myelin	3/495	19/23407	0.00707897	0.0349273	0.0257992	83964/19211/93742	3
Cellular component	GO:0045177	apical part of cell	17/495	413/23407	0.00729109	0.0356377	0.0263239	12558/12540/18222/13649/13039/17997/110350/12316/76123/15519/11799/105787/12520/19211/56508/93742/20496	17
Cellular component	GO:0045171	intercellular bridge	5/495	58/23407	0.0075672	0.0366449	0.0270679	225160/18747/12545/329207/72119	5
Cellular component	GO:0017053	transcriptional repressor complex	6/495	82/23407	0.00785023	0.0376667	0.0278226	235320/16476/20683/433759/20937/20466	6
Cellular component	GO:0043197	dendritic spine	10/495	192/23407	0.0079564	0.0378291	0.0279426	56637/12540/77579/13196/18747/233908/77116/19211/19229/56508	10
Cellular component	GO:0031616	spindle pole centrosome	3/495	20/23407	0.00819912	0.0386075	0.0285176	218977/20877/20878	3
Cellular component	GO:0044291	cell-cell contact zone	6/495	83/23407	0.00831495	0.0386075	0.0285176	109676/108058/11548/12558/83964/13052	6
Cellular component	GO:0044450	microtubule organizing center part	9/495	164/23407	0.00834159	0.0386075	0.0285176	100986/18004/15194/216846/17997/74237/74187/18817/11799	9
Cellular component	GO:0000242	pericentriolar material	3/495	21/23407	0.00941756	0.042569	0.0314437	100986/18004/17997	3
Cellular component	GO:0031514	motile cilium	10/495	197/23407	0.00944169	0.042569	0.0314437	76407/66722/18472/18747/110350/15519/16833/73333/18000/54562	10
Cellular component	GO:0044309	neuron spine	10/495	197/23407	0.00944169	0.042569	0.0314437	56637/12540/77579/13196/18747/233908/77116/19211/19229/56508	10
Cellular component	GO:0014704	intercalated disc	5/495	62/23407	0.00998028	0.0446127	0.0329533	109676/108058/11548/12558/13052	5
Cellular component	GO:0005637	nuclear inner membrane	4/495	41/23407	0.0107859	0.0478054	0.0353116	76407/16438/77053/223697	4
Molecular function	GO:0008022	protein C-terminus binding	31/489	234/22727	6.10867e-16	4.17833e-13	2.83571e-13	71175/19042/235320/26416/11350/50505/22059/20779/21750/16438/20683/13870/22218/22196/15901/14375/20437/59004/26395/17535/16648/17685/76123/12190/19361/107995/105787/21754/18708/19417/19229	31
Molecular function	GO:0140097	catalytic activity, acting on DNA	27/489	179/22727	1.80708e-15	6.18021e-13	4.19432e-13	19355/19366/50505/211064/21750/22589/13870/71567/54125/71711/18970/21976/13436/13205/13435/56626/14375/17535/52864/26909/22594/114714/15361/12144/26972/13404/19361	27
Molecular function	GO:0044389	ubiquitin-like protein ligase binding	34/489	325/22727	2.99917e-14	6.83812e-12	4.64083e-12	12189/170930/19017/67030/16476/20610/22059/20779/56637/22195/13649/14828/22218/58230/99375/65255/18747/17126/59004/110213/22223/224727/12317/67241/21849/58186/22187/15519/268697/20878/100038882/18708/19229/22210	34
Molecular function	GO:0031625	ubiquitin protein ligase binding	32/489	306/22727	1.7679e-13	3.0231e-11	2.05169e-11	12189/170930/19017/67030/16476/22059/20779/56637/22195/13649/14828/22218/58230/99375/65255/18747/17126/59004/110213/22223/224727/12317/67241/21849/58186/22187/15519/20878/100038882/18708/19229/22210	32
Molecular function	GO:0004674	protein serine/threonine kinase activity	38/489	456/22727	1.20162e-12	1.64382e-10	1.11561e-10	108058/11651/12567/26416/26413/108099/110651/20869/12568/56637/26420/16886/50772/23939/57261/18747/18004/22367/606496/26395/12566/11920/12545/20877/117229/18817/12534/12649/18005/20878/12236/105787/18647/17164/21754/19229/217718/17451	38
Molecular function	GO:0003697	single-stranded DNA binding	19/489	112/22727	3.29217e-12	3.75307e-10	2.5471e-10	50505/21750/13870/71567/53424/18861/17350/15499/17685/58186/19362/12144/66634/56449/13404/12190/19361/19364/240697	19
Molecular function	GO:0008094	DNA-dependent ATPase activity	16/489	91/22727	9.78454e-11	9.56089e-09	6.48869e-09	22589/17687/13205/14375/17535/214901/17685/20586/58186/114714/12144/26972/55993/13404/19361/19364	16
Molecular function	GO:0035173	histone kinase activity	8/489	17/22727	8.89734e-10	7.60722e-08	5.1628e-08	22367/12566/20877/12534/12649/268697/20878/105787	8
Molecular function	GO:0051427	hormone receptor binding	20/489	177/22727	1.67199e-09	1.27071e-07	8.62393e-08	20592/170930/19017/20779/230673/23957/11835/22218/13982/18159/233908/14360/11614/12317/20586/15361/19183/22259/18708/20181	20
Molecular function	GO:0002039	p53 binding	13/489	71/22727	3.37084e-09	2.30566e-07	1.56478e-07	22062/110147/22059/20869/12568/56637/17701/15194/433759/12578/20586/12144/22061	13
Molecular function	GO:0035257	nuclear hormone receptor binding	18/489	149/22727	3.75048e-09	2.33211e-07	1.58274e-07	20592/170930/19017/20779/230673/23957/11835/22218/13982/233908/11614/12317/20586/15361/19183/22259/18708/20181	18
Molecular function	GO:0001228	DNA-binding transcription activator activity, RNA polymerase II-specific	30/489	432/22727	2.1247e-08	1.15976e-06	7.87094e-07	22062/17932/17863/16476/22059/22026/20683/56218/17701/230908/11835/13982/14536/269800/71702/13018/17126/18044/17864/18291/50796/15361/26910/78284/22259/20843/22061/18033/664799/22697	30
Molecular function	GO:0000217	DNA secondary structure binding	8/489	24/22727	2.35736e-08	1.15976e-06	7.87094e-07	11350/22632/11614/17685/58186/114714/12144/19364	8
Molecular function	GO:0016887	ATPase activity	30/489	435/22727	2.48151e-08	1.15976e-06	7.87094e-07	22589/14828/77579/217716/18861/17687/17350/13205/14375/110350/17535/228421/214901/17685/20586/73804/74691/60530/74187/58186/114714/12144/15519/26972/55993/15512/13404/83456/19361/19364	30
Molecular function	GO:0003684	damaged DNA binding	11/489	56/22727	2.54333e-08	1.15976e-06	7.87094e-07	12189/50505/19359/13870/18970/14375/22594/17685/15270/12144/22061	11
Molecular function	GO:0035258	steroid hormone receptor binding	13/489	86/22727	3.76527e-08	1.51981e-06	1.03145e-06	20592/19017/20779/230673/11835/22218/13982/233908/11614/12317/20586/19183/18708	13
Molecular function	GO:0042393	histone binding	21/489	233/22727	3.7773e-08	1.51981e-06	1.03145e-06	70238/22589/13039/58230/11634/69260/75605/22367/12416/381022/67773/20586/15270/68298/18140/114642/76044/66197/68231/664799/328440	21
Molecular function	GO:0004520	endodeoxyribonuclease activity	9/489	40/22727	1.38818e-07	5.27509e-06	3.58004e-06	50505/13870/71711/17535/52864/26909/22594/114714/26972	9
Molecular function	GO:0042623	ATPase activity, coupled	25/489	350/22727	1.90128e-07	6.84462e-06	4.64524e-06	22589/14828/77579/17687/13205/14375/110350/17535/228421/214901/17685/20586/74691/60530/74187/58186/114714/12144/26972/55993/15512/13404/83456/19361/19364	25
Molecular function	GO:0015631	tubulin binding	24/489	334/22727	2.99849e-07	1.02549e-05	6.95966e-06	19017/17755/18970/434204/18472/14595/66140/15194/99412/14360/66468/54418/74237/228421/16765/73804/74187/18817/11799/12190/74281/67269/19364/14632	24
Molecular function	GO:0003729	mRNA binding	21/489	266/22727	3.56843e-07	1.16229e-05	7.8881e-06	83557/13164/22059/15568/19401/230908/77579/83410/230861/13205/108062/12317/74203/83454/70248/57749/15519/56449/12877/378430/53422	21
Molecular function	GO:0004536	deoxyribonuclease activity	10/489	58/22727	4.01397e-07	1.24798e-05	8.46966e-06	19355/50505/13870/71711/17535/52864/26909/22594/114714/26972	10
Molecular function	GO:0097718	disordered domain specific binding	8/489	34/22727	4.8165e-07	1.42851e-05	9.69488e-06	22059/14360/12578/17126/20437/15519/15512/12050	8
[truncated: 152 more rows]
